# Supplementary material
Source: publisher site journal article supplement (https://www.spandidos-publications.com/6799/downloadSupplementary)
Supplement: Supplementary file 1 [file downloadSupplementary]

## Sheet: Sheet1
Table SVI. GO annotation analysis of biological process for targets of downregulated piwi-interacting RNAs.
Term	Overlap	P-value	Adjusted P-value	Odds Ratio	Combined Score	Genes
Regulation Of Microtubule Nucleation (GO:0010968)	2024-10-03	0.000915411	0.600848	20.6728	144.63	RANGRF;HSPA1B;HSPA1A
Cellular Response To Heat (GO:0034605)	1940-05-01	0.00127408	0.600848	6.91513	46.093	HSP90AA2P;HSP90AB2P;DAXX;HSPA1B;HSPA1A
Negative Regulation Of Potassium Ion Transport (GO:0043267)	2024-12-03	0.00162792	0.600848	16.0772	103.223	CAV3;BIN1;PTK2B
Mitochondrial Electron Transport, Cytochrome C To Oxygen (GO:0006123)	2016-03-01	0.00389967	0.600848	11.1281	61.7259	COX4I1;MTCO2P12;COX6A1
Cellular Heat Acclimation (GO:0070370)	2024-05-02	0.0040047	0.600848	32.0852	177.119	HSPA1B;HSPA1A
Heat Acclimation (GO:0010286)	2024-05-02	0.0040047	0.600848	32.0852	177.119	HSPA1B;HSPA1A
Cellular Response To Unfolded Protein (GO:0034620)	2017-03-01	0.00466417	0.600848	10.3327	55.4643	DAXX;DAB2IP;HSPA1A
Negative Regulation Of Cell Cycle Process (GO:0010948)	1934-04-01	0.00492089	0.600848	6.43984	34.223	ESPL1;VPS4A;DAB2IP;BAZ1B
Regulation Of Nucleotide-Binding Oligomerization Domain Containing 2 Signaling Pathway (GO:0070432)	2024-06-02	0.00592597	0.600848	24.0627	123.403	HSPA1B;HSPA1A
Axonemal Dynein Complex Assembly (GO:0070286)	1937-04-01	0.00667977	0.600848	5.8535	29.3182	CLXN;DNAH17;DNAH5;CCDC40
Cilium Movement (GO:0003341)	1959-05-01	0.00706972	0.600848	4.47768	22.1732	CLXN;CFAP251;DNAH17;DNAH5;CCDC40
Release Of Sequestered Calcium Ion Into Cytosol (GO:0051209)	1939-04-01	0.00805756	0.600848	5.51845	26.6052	LCK;PLCH2;SLC8B1;CHERP
Positive Regulation Of Microtubule Nucleation (GO:0090063)	2024-07-02	0.00818457	0.600848	19.2491	92.5018	HSPA1B;HSPA1A
Positive Regulation Of Oligodendrocyte Differentiation (GO:0048714)	2024-07-02	0.00818457	0.600848	19.2491	92.5018	TENM4;IL34
Purine-Containing Compound Metabolic Process (GO:0072521)	2024-07-02	0.00818457	0.600848	19.2491	92.5018	MACROD1;FHIT
Regulation Of Cardiac Muscle Cell Action Potential Involved In Regulation Of Contraction (GO:0098909)	2024-07-02	0.00818457	0.600848	19.2491	92.5018	CAV3;RANGRF
Outer Dynein Arm Assembly (GO:0036158)	2021-03-01	0.00858788	0.600848	8.03489	38.2252	CLXN;DNAH17;DNAH5
Cellular Response To Topologically Incorrect Protein (GO:0035967)	2022-03-01	0.00979523	0.600848	7.61162	35.2103	DAXX;DAB2IP;HSPA1A
Embryonic Placenta Development (GO:0001892)	2024-08-02	0.010766	0.600848	16.0401	72.6837	IGF2;ZNF568
Positive Regulation Of Synapse Maturation (GO:0090129)	2024-08-02	0.010766	0.600848	16.0401	72.6837	NEURL1;DAB2IP
Positive Regulation Of Tumor Necrosis Factor-Mediated Signaling Pathway (GO:1903265)	2024-08-02	0.010766	0.600848	16.0401	72.6837	HSPA1B;HSPA1A
Energy Derivation By Oxidation Of Organic Compounds (GO:0015980)	1943-04-01	0.0113437	0.600848	4.95144	22.1779	COX4I1;GFPT2;MTCO2P12;COX6A1
Response To Unfolded Protein (GO:0006986)	1944-04-01	0.0122814	0.600848	4.82741	21.239	DAXX;DAB2IP;HERPUD1;HSPA1A
Retrograde Transport, Endosome To Golgi (GO:0042147)	1994-06-01	0.0126982	0.600848	3.29963	14.4071	SGSM2;ARL1;VPS26B;SNX8;PHETA1;STX10
Serine Family Amino Acid Catabolic Process (GO:0009071)	2024-09-02	0.0136561	0.600848	13.748	59.0279	CBS;SDSL
Myelin Assembly (GO:0032288)	2024-09-02	0.0136561	0.600848	13.748	59.0279	TENM4;NCMAP
Positive Regulation Of Protein Polymerization (GO:0032273)	1970-05-01	0.0142584	0.600848	3.71782	15.8023	CAV3;BIN1;PTK2B;AMBRA1;BAIAP2
Insulin Receptor Signaling Pathway (GO:0008286)	1947-04-01	0.0153867	0.600848	4.48992	18.7421	SHC1;IGF2;PIK3R2;BAIAP2
Protein Monoubiquitination (GO:0006513)	1947-04-01	0.0153867	0.600848	4.48992	18.7421	NEURL1;TRIM37;FAAP100;RNF220
Regulation Of Cardiac Muscle Cell Contraction (GO:0086004)	2026-03-01	0.0155732	0.600848	6.28657	26.166	CAV3;PDE4B;RANGRF
Cellular Response To Insulin Stimulus (GO:0032869)	1999-06-01	0.0160659	0.600848	3.12143	12.8948	TBC1D4;SHC1;IGF2;PIK3R2;BAIAP2;LPIN3
Regulation Of Tumor Necrosis Factor-Mediated Signaling Pathway (GO:0010803)	1948-04-01	0.0165217	0.600848	4.38765	18.0029	SPHK1;MIB2;HSPA1B;HSPA1A
L-serine Metabolic Process (GO:0006563)	2024-10-02	0.0168412	0.600848	12.0289	49.125	CBS;SDSL
Regulation Of Inclusion Body Assembly (GO:0090083)	2024-10-02	0.0168412	0.600848	12.0289	49.125	HSPA1B;HSPA1A
Regulation Of Synapse Maturation (GO:0090128)	2024-10-02	0.0168412	0.600848	12.0289	49.125	NEURL1;DAB2IP
Negative Regulation Of Inclusion Body Assembly (GO:0090084)	2024-10-02	0.0168412	0.600848	12.0289	49.125	HSPA1B;HSPA1A
Chaperone Cofactor-Dependent Protein Refolding (GO:0051085)	2027-03-01	0.0172594	0.600848	6.02432	24.4551	HSPA7;HSPA1B;HSPA1A
Protein Depolymerization (GO:0051261)	2028-03-01	0.0190435	0.600848	5.78305	22.9068	VPS4A;MICAL3;KIF2C
Cholesterol Transport (GO:0030301)	1951-04-01	0.0202356	0.600848	4.10696	16.0184	MSR1;VPS4A;LCAT;ABCA8
Regulation Of Cilium Movement (GO:0003352)	2024-11-02	0.0203083	0.600848	10.6918	41.663	CLXN;CCDC40
Glycerol Metabolic Process (GO:0006071)	2024-11-02	0.0203083	0.600848	10.6918	41.663	TKFC;PGPEP1
Negative Regulation Of Potassium Ion Transmembrane Transport (GO:1901380)	2024-11-02	0.0203083	0.600848	10.6918	41.663	CAV3;BIN1
Pentose-Phosphate Shunt (GO:0006098)	2024-11-02	0.0203083	0.600848	10.6918	41.663	G6PD;H6PD
Positive Regulation Of Myelination (GO:0031643)	2024-11-02	0.0203083	0.600848	10.6918	41.663	TENM4;NCMAP
Positive Regulation Of Stress-Activated MAPK Cascade (GO:0032874)	6/105	0.0208651	0.600848	2.93135	11.3434	SPHK1;MBIP;DUSP19;DAB2IP;PTK2B;RELL1
JNK Cascade (GO:0007254)	2029-03-01	0.0209258	0.600848	5.56034	21.5006	MAP4K1;DAXX;SH2D3A
Regulation Of Protein Modification By Small Protein Conjugation Or Removal (GO:1903320)	2029-03-01	0.0209258	0.600848	5.56034	21.5006	DAXX;HSPA1B;HSPA1A
Response To Steroid Hormone (GO:0048545)	2029-03-01	0.0209258	0.600848	5.56034	21.5006	PAQR8;HSPA1B;HSPA1A
Positive Regulation Of Microtubule Polymerization (GO:0031116)	2029-03-01	0.0209258	0.600848	5.56034	21.5006	CAV3;HSPA1B;HSPA1A
NADPH Regeneration (GO:0006740)	2024-12-02	0.0240443	0.600848	9.62211	35.8698	G6PD;H6PD
Regulation Of Lymphocyte Migration (GO:2000401)	2024-12-02	0.0240443	0.600848	9.62211	35.8698	SPNS2;SLC8B1
Early Endosome To Golgi Transport (GO:0034498)	2024-12-02	0.0240443	0.600848	9.62211	35.8698	SNX8;STX10
Synaptic Membrane Adhesion (GO:0099560)	2024-12-02	0.0240443	0.600848	9.62211	35.8698	LRFN5;SLITRK2
De Novo' Post-Translational Protein Folding (GO:0051084)	1932-03-01	0.0271624	0.600848	4.98437	17.9733	HSPA7;HSPA1B;HSPA1A
Muscle Cell Development (GO:0055001)	1932-03-01	0.0271624	0.600848	4.98437	17.9733	RAMP2;CAV3;BIN1
Peptidyl-Tyrosine Autophosphorylation (GO:0038083)	2013-02-01	0.0280371	0.600848	8.74693	31.2635	LCK;PTK2B
Protein Import Into Peroxisome Matrix (GO:0016558)	2013-02-01	0.0280371	0.600848	8.74693	31.2635	PEX5;TRIM37
Integrin-Mediated Signaling Pathway (GO:0007229)	1985-05-01	0.0302399	0.600848	3.01841	10.5602	COL16A1;PTPRA;ADAM11;PTK2B;ITGB6
ATP Metabolic Process (GO:0046034)	1934-03-01	0.03181	0.600848	4.66232	16.0756	ATP5PO;HSPA1B;HSPA1A
Regulation Of Phosphatidylinositol 3-Kinase Activity (GO:0043551)	1934-03-01	0.03181	0.600848	4.66232	16.0756	DAB2IP;PTK2B;PIK3R2
Cellular Response To Vascular Endothelial Growth Factor Stimulus (GO:0035924)	1934-03-01	0.03181	0.600848	4.66232	16.0756	RAMP2;SPHK1;DAB2IP
Establishment Of Chromosome Localization (GO:0051303)	2014-02-01	0.0322744	0.600848	8.01761	27.5283	SPICE1;KIF2C
Cellular Response To Oxidative Stress (GO:0034599)	6/117	0.0331855	0.600848	2.61284	8.89839	G6PD;PEX5;KEAP1;MPV17;HSPA1B;HSPA1A
Cellular Response To Chemical Stress (GO:0062197)	1989-05-01	0.0358579	0.600848	2.87409	9.56551	G6PD;KEAP1;LRRC8E;HSPA1B;HSPA1A
Negative Regulation Of Cation Transmembrane Transport (GO:1904063)	2015-02-01	0.0367449	0.600848	7.40049	24.4494	CAV3;BIN1
Negative Regulation Of Endoplasmic Reticulum Stress-Induced Intrinsic Apoptotic Signaling Pathway (GO:1902236)	2015-02-01	0.0367449	0.600848	7.40049	24.4494	HERPUD1;HSPA1A
Negative Regulation Of Sequestering Of Calcium Ion (GO:0051283)	1936-03-01	0.0368456	0.600848	4.37931	14.4562	LCK;PLCH2;CHERP
Phosphatidylinositol-Mediated Signaling (GO:0048015)	1962-04-01	0.037996	0.600848	3.32618	10.8775	TYRO3;PIK3R2;PI4KB;PLCH2
Regulation Of p38MAPK Cascade (GO:1900744)	1937-03-01	0.0395073	0.600848	4.25029	13.7338	SPHK1;DAB2IP;RELL1
Cellular Response To Growth Factor Stimulus (GO:0071363)	7/155	0.0404423	0.600848	2.28757	7.33823	RAMP2;SMAD3;SHC1;SPHK1;DAB2IP;LRP2;TGFBR2
Regulation Of Presynapse Assembly (GO:1905606)	2016-02-01	0.041437	0.600848	6.87153	21.8761	LRFN5;SLITRK2
Regulation Of Presynapse Organization (GO:0099174)	2016-02-01	0.041437	0.600848	6.87153	21.8761	LRFN5;SLITRK2
Regulation Of Protein Kinase C Signaling (GO:0090036)	2016-02-01	0.041437	0.600848	6.87153	21.8761	MC1R;SEZ6
Regulation Of Transforming Growth Factor Beta Production (GO:0071634)	2016-02-01	0.041437	0.600848	6.87153	21.8761	SMAD3;ITGB6
Nuclear Chromosome Segregation (GO:0098813)	2016-02-01	0.041437	0.600848	6.87153	21.8761	SPICE1;KIF2C
Protein Targeting To Peroxisome (GO:0006625)	2016-02-01	0.041437	0.600848	6.87153	21.8761	PEX5;TRIM37
Regulation Of NMDA Receptor Activity (GO:2000310)	2016-02-01	0.041437	0.600848	6.87153	21.8761	SLC6A9;PTK2B
Regulation Of Autophagosome Maturation (GO:1901096)	2016-02-01	0.041437	0.600848	6.87153	21.8761	CLEC16A;TECPR1
RNA Transport (GO:0050658)	1939-03-01	0.0451144	0.600848	4.01375	12.4368	PEG10;TGFBR2;SIDT2
T Cell Receptor Signaling Pathway (GO:0050852)	1995-05-01	0.0454183	0.600848	2.68166	8.29125	BTNL9;BTN2A2;LCK;PDE4B;CD276
Regulation Of Leukocyte Chemotaxis (GO:0002688)	2017-02-01	0.0463401	0.600848	6.4131	19.6994	PTK2B;SLC8B1
Aorta Morphogenesis (GO:0035909)	2017-02-01	0.0463401	0.600848	6.4131	19.6994	MYLK;TGFBR2
Branched-Chain Amino Acid Catabolic Process (GO:0009083)	2017-02-01	0.0463401	0.600848	6.4131	19.6994	HIBADH;SLC25A44
Extracellular Matrix Assembly (GO:0085029)	2017-02-01	0.0463401	0.600848	6.4131	19.6994	RAMP2;FBLN5
Motile Cilium Assembly (GO:0044458)	2017-02-01	0.0463401	0.600848	6.4131	19.6994	SPATA6;CCDC40
Peroxisomal Membrane Transport (GO:0015919)	2017-02-01	0.0463401	0.600848	6.4131	19.6994	PEX5;TRIM37
Positive Regulation Of Alpha-Beta T Cell Proliferation (GO:0046641)	2017-02-01	0.0463401	0.600848	6.4131	19.6994	RASAL3;TGFBR2
Positive Regulation Of Glial Cell Differentiation (GO:0045687)	2017-02-01	0.0463401	0.600848	6.4131	19.6994	TENM4;IL34
Receptor Recycling (GO:0001881)	2017-02-01	0.0463401	0.600848	6.4131	19.6994	PEX5;PHETA1
Golgi Vesicle Transport (GO:0048193)	8/197	0.0501149	0.600848	2.048	6.13056	COPB2;TRAPPC6A;SGSM2;RANGRF;SEC24D;SNX8;SCAMP3;STX10
Positive Regulation Of Actin Filament Polymerization (GO:0030838)	1941-03-01	0.0510933	0.600848	3.80211	11.3079	BIN1;PTK2B;BAIAP2
Regulation Of Oligodendrocyte Differentiation (GO:0048713)	2018-02-01	0.0514435	0.600848	6.01198	17.8392	TENM4;IL34
Glucose 6-Phosphate Metabolic Process (GO:0051156)	2018-02-01	0.0514435	0.600848	6.01198	17.8392	G6PD;H6PD
Negative Regulation Of Amyloid Precursor Protein Catabolic Process (GO:1902992)	2018-02-01	0.0514435	0.600848	6.01198	17.8392	BIN1;FLOT2
Negative Regulation Of Monoatomic Ion Transport (GO:0043271)	2018-02-01	0.0514435	0.600848	6.01198	17.8392	CAV3;PTK2B
Positive Regulation Of Nervous System Process (GO:0031646)	2018-02-01	0.0514435	0.600848	6.01198	17.8392	TENM4;NCMAP
Stress-Activated MAPK Cascade (GO:0051403)	1942-03-01	0.0542195	0.600848	3.70443	10.7974	MAP4K1;DAXX;SH2D3A
Regulation Of Actin Filament Polymerization (GO:0030833)	1970-04-01	0.0551238	0.600848	2.92181	8.46792	BIN1;COTL1;PTK2B;BAIAP2
Regulation Of Centriole Replication (GO:0046599)	2019-02-01	0.056737	0.600848	5.65804	16.2348	SPICE1;TRIM37
RNA-templated DNA Biosynthetic Process (GO:0006278)	2019-02-01	0.056737	0.600848	5.65804	16.2348	TNKS1BP1;WRAP53
Regulation Of Protein-Containing Complex Disassembly (GO:0043244)	2019-02-01	0.056737	0.600848	5.65804	16.2348	CLEC16A;TECPR1
Cellular Response To Catecholamine Stimulus (GO:0071870)	2019-02-01	0.056737	0.600848	5.65804	16.2348	PDE4B;TGM2
Telomere Maintenance Via Telomerase (GO:0007004)	2019-02-01	0.056737	0.600848	5.65804	16.2348	TNKS1BP1;WRAP53
Phosphate Ion Transport (GO:0006817)	2019-02-01	0.056737	0.600848	5.65804	16.2348	SLC34A1;SLC37A3
Protein Transport (GO:0015031)	11/313	0.0580182	0.600848	1.76528	5.02574	GSDMD;MACF1;COPB2;RAMP2;TFR2;ARL1;VPS26B;LRP2;SNX8;SCAMP3;STX10
Activation Of GTPase Activity (GO:0090630)	5/102	0.0583203	0.600848	2.48724	7.06825	RAP1GAP2;TBC1D9B;TBC1D4;SGSM2;SIPA1L2
Regulation Of MAPK Cascade (GO:0043408)	8/204	0.0590981	0.600848	1.97415	5.58399	DUSP4;MAP4K1;CAV3;SHC1;IGF2;DAB2IP;DUSP19;PIK3R2
Regulation Of Macrophage Chemotaxis (GO:0010758)	2020-02-01	0.0622108	0.600848	5.34343	14.8399	IL34;PTK2B
Regulation Of Membrane Depolarization (GO:0003254)	2020-02-01	0.0622108	0.600848	5.34343	14.8399	CAV3;RANGRF
Regulation Of Mitotic Spindle Assembly (GO:1901673)	2020-02-01	0.0622108	0.600848	5.34343	14.8399	HSPA1B;HSPA1A
Cilium-Dependent Cell Motility (GO:0060285)	2020-02-01	0.0622108	0.600848	5.34343	14.8399	DNAH3;DNAH17
Endoplasmic Reticulum Calcium Ion Homeostasis (GO:0032469)	2020-02-01	0.0622108	0.600848	5.34343	14.8399	HERPUD1;TGM2
Negative Regulation Of Small GTPase Mediated Signal Transduction (GO:0051058)	2020-02-01	0.0622108	0.600848	5.34343	14.8399	DAB2IP;RASAL3
Regulation Of Calcium Ion Transmembrane Transport (GO:1903169)	2020-02-01	0.0622108	0.600848	5.34343	14.8399	CAV3;PTK2B
Triglyceride Metabolic Process (GO:0006641)	1945-03-01	0.06413	0.600848	3.4393	9.44723	CAV3;LPIN3;SLC27A5
Lysosomal Transport (GO:0007041)	5/105	0.0644282	0.600848	2.41225	6.61489	BIN1;FHIP1B;VPS4A;CLEC16A;HSPA1A
Regulation Of Nervous System Development (GO:0051960)	1946-03-01	0.0676063	0.600848	3.35915	9.04972	TENM4;BHLHE40;ELAPOR2
Response To Cadmium Ion (GO:0046686)	2021-02-01	0.0678554	0.600848	5.06194	13.6185	DAXX;SLC34A1
Mitochondrial Calcium Ion Homeostasis (GO:0051560)	2021-02-01	0.0678554	0.600848	5.06194	13.6185	SLC8B1;TGM2
Regulation Of Cell-Substrate Junction Assembly (GO:0090109)	2021-02-01	0.0678554	0.600848	5.06194	13.6185	MACF1;PTPRA
Transmembrane Receptor Protein Tyrosine Kinase Signaling Pathway (GO:0007169)	10/284	0.0678697	0.600848	1.76692	4.7533	SHC1;LCK;TYRO3;IGF2;COL4A6;PTK2B;PIK3R2;ARHGEF7;BAIAP2;MPZL1
Positive Regulation Of JNK Cascade (GO:0046330)	1977-04-01	0.0729933	0.600848	2.64069	6.91171	DUSP19;MBIP;DAB2IP;PTK2B
Regulation Of Proteasomal Ubiquitin-Dependent Protein Catabolic Process (GO:0032434)	5/109	0.0731085	0.600848	2.319	6.06606	KEAP1;FHIT;HSPA1B;HERPUD1;HSPA1A
Extracellular Structure Organization (GO:0043062)	5/109	0.0731085	0.600848	2.319	6.06606	COL16A1;COL7A1;COL4A6;COL4A5;COL10A1
Negative Regulation Of Extrinsic Apoptotic Signaling Pathway In Absence Of Ligand (GO:2001240)	2022-02-01	0.0736614	0.600848	4.8086	12.5422	HSPA1B;HSPA1A
Negative Regulation Of Signal Transduction In Absence Of Ligand (GO:1901099)	2022-02-01	0.0736614	0.600848	4.8086	12.5422	HSPA1B;HSPA1A
Positive Regulation Of Cholesterol Efflux (GO:0010875)	2022-02-01	0.0736614	0.600848	4.8086	12.5422	ABCA3;ABCA8
Positive Regulation Of Viral Life Cycle (GO:1903902)	2022-02-01	0.0736614	0.600848	4.8086	12.5422	VPS4A;TYRO3
Cellular Defense Response (GO:0006968)	1948-03-01	0.0748098	0.600848	3.20952	8.32167	NCR2;PTK2B;CCR3
External Encapsulating Structure Organization (GO:0045229)	5/110	0.0753737	0.600848	2.29679	5.93789	COL16A1;COL7A1;COL4A6;COL4A5;COL10A1
Positive Regulation Of Protein Kinase Activity (GO:0045860)	6/145	0.0776523	0.600848	2.08351	5.32444	DAXX;IL34;DUSP19;DAB2IP;PTK2B;TGFBR2
Mitotic Sister Chromatid Segregation (GO:0000070)	5/111	0.0776766	0.600848	2.27501	5.81311	ESPL1;VPS4A;SPICE1;KIF2C;SMC4
Negative Regulation Of Transmembrane Receptor Protein Serine/Threonine Kinase Signaling Pathway (GO:0090101)	5/111	0.0776766	0.600848	2.27501	5.81311	PEG10;LDLRAD4;LRP2;FSTL3;HSPA1A
Positive Regulation Of miRNA Metabolic Process (GO:2000630)	1949-03-01	0.0785338	0.600848	3.13959	7.98783	SREBF1;SMAD3;ZSWIM8
Positive Regulation Of Nervous System Development (GO:0051962)	1949-03-01	0.0785338	0.600848	3.13959	7.98783	SLITRK2;LRP2;TGM2
Heparan Sulfate Proteoglycan Biosynthetic Process (GO:0015012)	2023-02-01	0.07962	0.600848	4.57938	11.5881	XYLT2;EXTL3
Positive Regulation Of Protein Targeting To Membrane (GO:0090314)	2023-02-01	0.07962	0.600848	4.57938	11.5881	TCAF1;MTCL1
Neuron Projection Morphogenesis (GO:0048812)	6/146	0.0796636	0.600848	2.06852	5.23324	TRIO;SLITRK2;DAB2IP;LRP2;BAIAP2;PAX2
Regulation Of TORC1 Signaling (GO:1903432)	1950-03-01	0.0823373	0.600848	3.07263	7.67215	SZT2;NPRL2;CLEC16A
Regulation Of Endoplasmic Reticulum Stress-Induced Intrinsic Apoptotic Signaling Pathway (GO:1902235)	2024-02-01	0.0857225	0.600848	4.37101	10.738	HERPUD1;HSPA1A
Regulation Of Heterotypic Cell-Cell Adhesion (GO:0034114)	2024-02-01	0.0857225	0.600848	4.37101	10.738	LCK;FLOT2
Negative Regulation Of Ion Transmembrane Transporter Activity (GO:0032413)	2024-02-01	0.0857225	0.600848	4.37101	10.738	CAV3;SLC6A9
Outflow Tract Septum Morphogenesis (GO:0003148)	2024-02-01	0.0857225	0.600848	4.37101	10.738	LRP2;TGFBR2
Positive Regulation Of p38MAPK Cascade (GO:1900745)	2024-02-01	0.0857225	0.600848	4.37101	10.738	SPHK1;RELL1
Positive Regulation Of Peptidyl-Threonine Phosphorylation (GO:0010800)	2024-02-01	0.0857225	0.600848	4.37101	10.738	SPHK1;TNKS1BP1
Protein Exit From Endoplasmic Reticulum (GO:0032527)	2024-02-01	0.0857225	0.600848	4.37101	10.738	RANGRF;HERPUD1
Protein Kinase B Signaling (GO:0043491)	2024-02-01	0.0857225	0.600848	4.37101	10.738	TYRO3;PAX2
Metaphase Plate Congression (GO:0051310)	1951-03-01	0.0862187	0.600848	3.00847	7.37336	VPS4A;SPICE1;KIF2C
Microtubule Bundle Formation (GO:0001578)	1951-03-01	0.0862187	0.600848	3.00847	7.37336	RSPH1;MTCL1;CCDC40
Negative Regulation Of MAP Kinase Activity (GO:0043407)	1951-03-01	0.0862187	0.600848	3.00847	7.37336	CAV3;DUSP19;DAB2IP
Regulation Of Epithelial To Mesenchymal Transition (GO:0010717)	1983-04-01	0.0903642	0.600848	2.43938	5.86405	SMAD3;DAB2IP;LDLRAD4;TGFBR2
Calcium Ion Transmembrane Import Into Cytosol (GO:0097553)	1983-04-01	0.0903642	0.600848	2.43938	5.86405	LCK;TRPV3;PLCH2;CHERP
Positive Regulation Of Proteasomal Ubiquitin-Dependent Protein Catabolic Process (GO:0032436)	1983-04-01	0.0903642	0.600848	2.43938	5.86405	KEAP1;HSPA1B;HERPUD1;HSPA1A
Positive Regulation Of Ubiquitin-Dependent Protein Catabolic Process (GO:2000060)	1983-04-01	0.0903642	0.600848	2.43938	5.86405	CAV3;KEAP1;HSPA1B;HSPA1A
Regulation Of Glycogen Biosynthetic Process (GO:0005979)	2025-02-01	0.0919606	0.600848	4.18075	9.97692	PPP1R3B;IGF2
Regulation Of Myelination (GO:0031641)	2025-02-01	0.0919606	0.600848	4.18075	9.97692	TENM4;NCMAP
Cellular Response To Steroid Hormone Stimulus (GO:0071383)	2025-02-01	0.0919606	0.600848	4.18075	9.97692	HSPA1B;HSPA1A
Sterol Transport (GO:0015918)	2025-02-01	0.0919606	0.600848	4.18075	9.97692	MSR1;LCAT
Negative Regulation Of TORC1 Signaling (GO:1904262)	2025-02-01	0.0919606	0.600848	4.18075	9.97692	SZT2;NPRL2
Negative Regulation Of Response To Endoplasmic Reticulum Stress (GO:1903573)	2025-02-01	0.0919606	0.600848	4.18075	9.97692	HERPUD1;HSPA1A
Regulation Of Actin Cytoskeleton Reorganization (GO:2000249)	2025-02-01	0.0919606	0.600848	4.18075	9.97692	PTK2B;BAIAP2
Regulation Of Cell Size (GO:0008361)	2025-02-01	0.0919606	0.600848	4.18075	9.97692	RAP1GAP2;CAV3
Positive Regulation Of NF-kappaB Transcription Factor Activity (GO:0051092)	6/152	0.0923383	0.600848	1.9829	4.72386	SPHK1;FLOT2;TRIM37;CARD14;HSPA1B;HSPA1A
Endocytosis (GO:0006897)	7/189	0.0939592	0.600848	1.85697	4.39153	MSR1;CAV3;BIN1;TFR2;TYRO3;PI4KB;LRP2
7-Methylguanosine RNA Capping (GO:0009452)	2024-05-01	0.0981617	0.600848	12.0018	27.8579	CMTR2
Regulation Of Establishment Of T Cell Polarity (GO:1903903)	2024-05-01	0.0981617	0.600848	12.0018	27.8579	FLOT2
L-ornithine Transmembrane Transport (GO:1903352)	2024-05-01	0.0981617	0.600848	12.0018	27.8579	SLC7A3
Regulation Of Glycogen (Starch) Synthase Activity (GO:2000465)	2024-05-01	0.0981617	0.600848	12.0018	27.8579	IGF2
Regulation Of Macrophage Proliferation (GO:0120040)	2024-05-01	0.0981617	0.600848	12.0018	27.8579	IL34
Amylin Receptor Signaling Pathway (GO:0097647)	2024-05-01	0.0981617	0.600848	12.0018	27.8579	RAMP2
Regulation Of Protein Targeting (GO:1903533)	2024-05-01	0.0981617	0.600848	12.0018	27.8579	SREBF1
Regulation Of Relaxation Of Cardiac Muscle (GO:1901897)	2024-05-01	0.0981617	0.600848	12.0018	27.8579	PDE4B
Regulation Of Sarcomere Organization (GO:0060297)	2024-05-01	0.0981617	0.600848	12.0018	27.8579	CAV3
Regulation Of Superoxide Metabolic Process (GO:0090322)	2024-05-01	0.0981617	0.600848	12.0018	27.8579	FBLN5
Cellular Response To Iron Ion (GO:0071281)	2024-05-01	0.0981617	0.600848	12.0018	27.8579	TFR2
Choline Metabolic Process (GO:0019695)	2024-05-01	0.0981617	0.600848	12.0018	27.8579	DMGDH
Determination Of Liver Left/Right Asymmetry (GO:0071910)	2024-05-01	0.0981617	0.600848	12.0018	27.8579	CCDC40
Endothelin Receptor Signaling Pathway (GO:0086100)	2024-05-01	0.0981617	0.600848	12.0018	27.8579	PTK2B
Epithelial Tube Formation (GO:0072175)	2024-05-01	0.0981617	0.600848	12.0018	27.8579	PAX2
Transmembrane Receptor Protein Tyrosine Phosphatase Signaling Pathway (GO:0007185)	2024-05-01	0.0981617	0.600848	12.0018	27.8579	TRIO
Valine Metabolic Process (GO:0006573)	2024-05-01	0.0981617	0.600848	12.0018	27.8579	HIBADH
Vascular Endothelial Growth Factor Receptor-2 Signaling Pathway (GO:0036324)	2024-05-01	0.0981617	0.600848	12.0018	27.8579	DAB2IP
Guanine Nucleotide Transmembrane Transport (GO:1903790)	2024-05-01	0.0981617	0.600848	12.0018	27.8579	LRRC8E
Ventricular Compact Myocardium Morphogenesis (GO:0003223)	2024-05-01	0.0981617	0.600848	12.0018	27.8579	LRP2
Inclusion Body Assembly (GO:0070841)	2024-05-01	0.0981617	0.600848	12.0018	27.8579	TRIM37
Intracellular Phosphate Ion Homeostasis (GO:0030643)	2024-05-01	0.0981617	0.600848	12.0018	27.8579	SLC34A1
Isoleucine Metabolic Process (GO:0006549)	2024-05-01	0.0981617	0.600848	12.0018	27.8579	SDSL
Ketone Body Biosynthetic Process (GO:0046951)	2024-05-01	0.0981617	0.600848	12.0018	27.8579	SLC27A5
Mesenchymal Cell Differentiation Involved In Kidney Development (GO:0072161)	2024-05-01	0.0981617	0.600848	12.0018	27.8579	PAX2
Mesenchymal To Epithelial Transition Involved In Metanephros Morphogenesis (GO:0003337)	2024-05-01	0.0981617	0.600848	12.0018	27.8579	PAX2
Mesodermal Cell Fate Commitment (GO:0001710)	2024-05-01	0.0981617	0.600848	12.0018	27.8579	PAX2
Metanephric Collecting Duct Development (GO:0072205)	2024-05-01	0.0981617	0.600848	12.0018	27.8579	PAX2
Mitochondrial Protein Catabolic Process (GO:0035694)	2024-05-01	0.0981617	0.600848	12.0018	27.8579	SFI1
Monoterpenoid Metabolic Process (GO:0016098)	2024-05-01	0.0981617	0.600848	12.0018	27.8579	CYP2E1
Negative Regulation Of Amyloid Precursor Protein Biosynthetic Process (GO:0042985)	2024-05-01	0.0981617	0.600848	12.0018	27.8579	AGO2
Negative Regulation Of Cell Size (GO:0045792)	2024-05-01	0.0981617	0.600848	12.0018	27.8579	CAV3
Negative Regulation Of Cytokinesis (GO:0032466)	2024-05-01	0.0981617	0.600848	12.0018	27.8579	VPS4A
Negative Regulation Of Endoplasmic Reticulum Calcium Ion Concentration (GO:0032471)	2024-05-01	0.0981617	0.600848	12.0018	27.8579	TGM2
Negative Regulation Of Heterochromatin Formation (GO:0031452)	2024-05-01	0.0981617	0.600848	12.0018	27.8579	PHF1
Negative Regulation Of Relaxation Of Muscle (GO:1901078)	2024-05-01	0.0981617	0.600848	12.0018	27.8579	PDE4B
Ornithine Transport (GO:0015822)	2024-05-01	0.0981617	0.600848	12.0018	27.8579	SLC7A3
Pexophagy (GO:0000425)	2024-05-01	0.0981617	0.600848	12.0018	27.8579	PEX5
Plasma Membrane Raft Assembly (GO:0044854)	2024-05-01	0.0981617	0.600848	12.0018	27.8579	CAV3
Positive Regulation Of NK T Cell Proliferation (GO:0051142)	2024-05-01	0.0981617	0.600848	12.0018	27.8579	RASAL3
Positive Regulation Of Cholesterol Biosynthetic Process (GO:0045542)	2024-05-01	0.0981617	0.600848	12.0018	27.8579	SREBF1
Positive Regulation Of Cholesterol Storage (GO:0010886)	2024-05-01	0.0981617	0.600848	12.0018	27.8579	MSR1
Positive Regulation Of Epithelial Cell Differentiation Involved In Kidney Development (GO:2000698)	2024-05-01	0.0981617	0.600848	12.0018	27.8579	PAX2
Positive Regulation Of Hemoglobin Biosynthetic Process (GO:0046985)	2024-05-01	0.0981617	0.600848	12.0018	27.8579	SLC6A9
Positive Regulation Of Protein Catabolic Process In The Vacuole (GO:1904352)	2024-05-01	0.0981617	0.600848	12.0018	27.8579	LRP2
Positive Regulation Of Pyruvate Dehydrogenase Activity (GO:1904184)	2024-05-01	0.0981617	0.600848	12.0018	27.8579	PPM1H
Positive Regulation Of Sterol Biosynthetic Process (GO:0106120)	2024-05-01	0.0981617	0.600848	12.0018	27.8579	SREBF1
Pronephros Development (GO:0048793)	2024-05-01	0.0981617	0.600848	12.0018	27.8579	PAX2
Protein Localization To Membrane Raft (GO:1903044)	2024-05-01	0.0981617	0.600848	12.0018	27.8579	FLOT2
Regulation Of Focal Adhesion Assembly (GO:0051893)	1954-03-01	0.0983133	0.600848	2.83106	6.56692	MACF1;COL16A1;PTPRA
Regulation Of Transcription By RNA Polymerase III (GO:0006359)	2026-02-01	0.0983262	0.600848	4.00635	9.29258	ZNF76;BAZ1B
Telomere Maintenance Via Telomere Lengthening (GO:0010833)	2026-02-01	0.0983262	0.600848	4.00635	9.29258	TNKS1BP1;WRAP53
Positive Regulation Of Erythrocyte Differentiation (GO:0045648)	2026-02-01	0.0983262	0.600848	4.00635	9.29258	HSPA1B;HSPA1A
Positive Regulation Of Phosphatidylinositol 3-Kinase Activity (GO:0043552)	2026-02-01	0.0983262	0.600848	4.00635	9.29258	PTK2B;AMBRA1
Regulation Of Extrinsic Apoptotic Signaling Pathway In Absence Of Ligand (GO:2001239)	2027-02-01	0.104812	0.600848	3.8459	8.67477	HSPA1B;HSPA1A
Amino Acid Import Across Plasma Membrane (GO:0089718)	2027-02-01	0.104812	0.600848	3.8459	8.67477	SLC6A9;SLC7A3
In Utero Embryonic Development (GO:0001701)	2027-02-01	0.104812	0.600848	3.8459	8.67477	IGF2;ZNF568
Fatty Acid Metabolic Process (GO:0006631)	5/122	0.10544	0.600848	2.05996	4.6341	FASN;CYP2E1;CPT1C;SLC27A5;LPIN3
Receptor-Mediated Endocytosis (GO:0006898)	5/122	0.10544	0.600848	2.05996	4.6341	MSR1;RAMP2;TFR2;PI4KB;LRP2
Regulation Of Reactive Oxygen Species Metabolic Process (GO:2000377)	1956-03-01	0.106735	0.600848	2.72395	6.09459	MPV17;PAX2;TGFBR2
Positive Regulation Of GTPase Activity (GO:0043547)	8/234	0.108496	0.600848	1.70944	3.79674	RAP1GAP2;TBC1D9B;TBC1D4;SGSM2;RGL4;SIPA1L2;ARHGEF7;TGM2
RNA Catabolic Process (GO:0006401)	1957-03-01	0.111048	0.600848	2.67337	5.87552	HSPA1B;SIDT2;HSPA1A
Endosome To Lysosome Transport (GO:0008333)	1957-03-01	0.111048	0.600848	2.67337	5.87552	BIN1;FHIP1B;CLEC16A
Regulation Of Calcium Ion Transport (GO:0051924)	1957-03-01	0.111048	0.600848	2.67337	5.87552	CAV3;SLC8B1;MYLK
Regulation Of Chromosome Segregation (GO:0051983)	2028-02-01	0.111409	0.600848	3.69779	8.11497	KIF2C;SMC4
Apoptotic Cell Clearance (GO:0043277)	2028-02-01	0.111409	0.600848	3.69779	8.11497	TYRO3;TGM2
Regulation Of Protein Targeting To Membrane (GO:0090313)	2028-02-01	0.111409	0.600848	3.69779	8.11497	TCAF1;MTCL1
Regulation Of Sodium Ion Transmembrane Transport (GO:1902305)	2028-02-01	0.111409	0.600848	3.69779	8.11497	CAV3;RANGRF
Cellular Response To Osmotic Stress (GO:0071470)	2028-02-01	0.111409	0.600848	3.69779	8.11497	LRRC8E;MYLK
Glycosaminoglycan Metabolic Process (GO:0030203)	2028-02-01	0.111409	0.600848	3.69779	8.11497	XYLT2;GUSB
Vascular Endothelial Growth Factor Receptor Signaling Pathway (GO:0048010)	2028-02-01	0.111409	0.600848	3.69779	8.11497	DAB2IP;PTK2B
Hematopoietic Progenitor Cell Differentiation (GO:0002244)	2028-02-01	0.111409	0.600848	3.69779	8.11497	ARMC6;FSTL3
Positive Regulation Of Protein Import Into Nucleus (GO:0042307)	2028-02-01	0.111409	0.600848	3.69779	8.11497	SMAD3;PIK3R2
Primary Neural Tube Formation (GO:0014020)	2028-02-01	0.111409	0.600848	3.69779	8.11497	LRP2;PAX2
Regulation Of Cardiac Muscle Cell Action Potential (GO:0098901)	2028-02-01	0.111409	0.600848	3.69779	8.11497	CAV3;RANGRF
Positive Regulation Of Proteasomal Protein Catabolic Process (GO:1901800)	1990-04-01	0.112874	0.600848	2.24002	4.88657	DAB2IP;KEAP1;HSPA1B;HSPA1A
7-Methylguanosine mRNA Capping (GO:0006370)	2024-06-01	0.116609	0.600848	9.60098	20.6318	CMTR2
Regulation Of Cortisol Biosynthetic Process (GO:2000064)	2024-06-01	0.116609	0.600848	9.60098	20.6318	H6PD
Regulation Of Extracellular Matrix Assembly (GO:1901201)	2024-06-01	0.116609	0.600848	9.60098	20.6318	SMAD3
Regulation Of Hemoglobin Biosynthetic Process (GO:0046984)	2024-06-01	0.116609	0.600848	9.60098	20.6318	SLC6A9
SMAD Protein Complex Assembly (GO:0007183)	2024-06-01	0.116609	0.600848	9.60098	20.6318	SMAD3
Regulation Of Inositol Phosphate Biosynthetic Process (GO:0010919)	2024-06-01	0.116609	0.600848	9.60098	20.6318	PTK2B
Regulation Of Ketone Biosynthetic Process (GO:0010566)	2024-06-01	0.116609	0.600848	9.60098	20.6318	H6PD
Amino-Acid Betaine Metabolic Process (GO:0006577)	2024-06-01	0.116609	0.600848	9.60098	20.6318	CPT1C
Bleb Assembly (GO:0032060)	2024-06-01	0.116609	0.600848	9.60098	20.6318	MYLK
Calcitonin Family Receptor Signaling Pathway (GO:0097646)	2024-06-01	0.116609	0.600848	9.60098	20.6318	RAMP2
Regulation Of Pyruvate Dehydrogenase Activity (GO:1904182)	2024-06-01	0.116609	0.600848	9.60098	20.6318	PPM1H
Cellular Hypotonic Response (GO:0071476)	2024-06-01	0.116609	0.600848	9.60098	20.6318	MYLK
Regulation Of Skeletal Muscle Contraction (GO:0014819)	2024-06-01	0.116609	0.600848	9.60098	20.6318	CAV3
Cellular Response To Monoamine Stimulus (GO:0071868)	2024-06-01	0.116609	0.600848	9.60098	20.6318	TGM2
Regulation Of Transforming Growth Factor Beta2 Production (GO:0032909)	2024-06-01	0.116609	0.600848	9.60098	20.6318	SMAD3
Response To Cocaine (GO:0042220)	2024-06-01	0.116609	0.600848	9.60098	20.6318	TGM2
Response To Lead Ion (GO:0010288)	2024-06-01	0.116609	0.600848	9.60098	20.6318	SLC34A1
Delamination (GO:0060232)	2024-06-01	0.116609	0.600848	9.60098	20.6318	AKNA
Determination Of Digestive Tract Left/Right Asymmetry (GO:0071907)	2024-06-01	0.116609	0.600848	9.60098	20.6318	CCDC40
Ribose Phosphate Biosynthetic Process (GO:0046390)	2024-06-01	0.116609	0.600848	9.60098	20.6318	G6PD
Elastic Fiber Assembly (GO:0048251)	2024-06-01	0.116609	0.600848	9.60098	20.6318	FBLN5
Epithelial Cell Differentiation Involved In Kidney Development (GO:0035850)	2024-06-01	0.116609	0.600848	9.60098	20.6318	PAX2
Spontaneous Synaptic Transmission (GO:0098814)	2024-06-01	0.116609	0.600848	9.60098	20.6318	RPH3A
Ethanol Catabolic Process (GO:0006068)	2024-06-01	0.116609	0.600848	9.60098	20.6318	SULT1A2
Sulfur Amino Acid Catabolic Process (GO:0000098)	2024-06-01	0.116609	0.600848	9.60098	20.6318	CBS
Ureter Development (GO:0072189)	2024-06-01	0.116609	0.600848	9.60098	20.6318	PAX2
Vacuole Organization (GO:0007033)	2024-06-01	0.116609	0.600848	9.60098	20.6318	VPS4A
Vascular Associated Smooth Muscle Cell Development (GO:0097084)	2024-06-01	0.116609	0.600848	9.60098	20.6318	RAMP2
Histone H2A-K119 Monoubiquitination (GO:0036353)	2024-06-01	0.116609	0.600848	9.60098	20.6318	TRIM37
Hypotonic Response (GO:0006971)	2024-06-01	0.116609	0.600848	9.60098	20.6318	MYLK
Ketone Body Metabolic Process (GO:1902224)	2024-06-01	0.116609	0.600848	9.60098	20.6318	SLC27A5
Lipid Hydroxylation (GO:0002933)	2024-06-01	0.116609	0.600848	9.60098	20.6318	CYP2E1
Marginal Zone B Cell Differentiation (GO:0002315)	2024-06-01	0.116609	0.600848	9.60098	20.6318	PTK2B
Metanephric Nephron Tubule Development (GO:0072234)	2024-06-01	0.116609	0.600848	9.60098	20.6318	PAX2
Negative Regulation Of Centriole Replication (GO:0046600)	2024-06-01	0.116609	0.600848	9.60098	20.6318	TRIM37
Positive Regulation Of ER-associated Ubiquitin-Dependent Protein Catabolic Process (GO:1903071)	2024-06-01	0.116609	0.600848	9.60098	20.6318	HERPUD1
Positive Regulation Of IRE1-mediated Unfolded Protein Response (GO:1903896)	2024-06-01	0.116609	0.600848	9.60098	20.6318	DAB2IP
Positive Regulation Of Gastrulation (GO:2000543)	2024-06-01	0.116609	0.600848	9.60098	20.6318	TENM4
Positive Regulation Of Gliogenesis (GO:0014015)	2024-06-01	0.116609	0.600848	9.60098	20.6318	LRP2
Positive Regulation Of Steroid Metabolic Process (GO:0045940)	2024-06-01	0.116609	0.600848	9.60098	20.6318	FSHB
Positive Regulation Of Trophoblast Cell Migration (GO:1901165)	2024-06-01	0.116609	0.600848	9.60098	20.6318	AGO2
Protein Import Into Peroxisome Matrix, Receptor Recycling (GO:0016562)	2024-06-01	0.116609	0.600848	9.60098	20.6318	PEX5
Regulation Of MDA-5 Signaling Pathway (GO:0039533)	2024-06-01	0.116609	0.600848	9.60098	20.6318	TKFC
Regulation Of NK T Cell Proliferation (GO:0051140)	2024-06-01	0.116609	0.600848	9.60098	20.6318	RASAL3
Regulation Of T Cell Tolerance Induction (GO:0002664)	2024-06-01	0.116609	0.600848	9.60098	20.6318	TGFBR2
Regulation Of Anion Channel Activity (GO:0010359)	2024-06-01	0.116609	0.600848	9.60098	20.6318	TCAF1
Regulation Of Cardiac Muscle Cell Membrane Potential (GO:0086036)	2024-06-01	0.116609	0.600848	9.60098	20.6318	SLC8B1
Alpha-Amino Acid Catabolic Process (GO:1901606)	2029-02-01	0.118112	0.600848	3.56065	7.606	HIBADH;CBS
Regulation Of Spindle Assembly (GO:0090169)	2029-02-01	0.118112	0.600848	3.56065	7.606	HSPA1B;HSPA1A
Regulation Of Striated Muscle Contraction (GO:0006942)	2029-02-01	0.118112	0.600848	3.56065	7.606	CAV3;TNNI1
Tube Closure (GO:0060606)	2029-02-01	0.118112	0.600848	3.56065	7.606	LRP2;PAX2
Cytosolic Transport (GO:0016482)	5/127	0.119475	0.600848	1.97502	4.19622	FHIP1B;ARL1;VPS26B;PHETA1;STX10
Response To Retinoic Acid (GO:0032526)	1960-03-01	0.124375	0.600848	2.53228	5.27842	PTK2B;PAX2;MICB
Artery Morphogenesis (GO:0048844)	1930-02-01	0.124912	0.600848	3.43331	7.14179	LRP2;TGFBR2
Embryonic Skeletal System Morphogenesis (GO:0048704)	1930-02-01	0.124912	0.600848	3.43331	7.14179	HOXC4;TGFBR2
Extrinsic Apoptotic Signaling Pathway Via Death Domain Receptors (GO:0008625)	1930-02-01	0.124912	0.600848	3.43331	7.14179	DAXX;DAB2IP
Negative Regulation Of Epithelial To Mesenchymal Transition (GO:0010719)	1930-02-01	0.124912	0.600848	3.43331	7.14179	DAB2IP;LDLRAD4
Positive Regulation Of JUN Kinase Activity (GO:0043507)	1930-02-01	0.124912	0.600848	3.43331	7.14179	DUSP19;DAB2IP
Vesicle Organization (GO:0016050)	1994-04-01	0.126743	0.600848	2.14003	4.42042	FHIP1B;VPS4A;PHETA1;STX10
Regulation Of Macrophage Activation (GO:0043030)	1931-02-01	0.131803	0.600848	3.31475	6.71716	LRFN5;SPHK1
Regulation Of Protein Localization To Cell Surface (GO:2000008)	1931-02-01	0.131803	0.600848	3.31475	6.71716	CAV3;RANGRF
Regulation Of Transmembrane Receptor Protein Serine/Threonine Kinase Signaling Pathway (GO:0090092)	1931-02-01	0.131803	0.600848	3.31475	6.71716	SMAD3;FSTL3
Positive Regulation Of Cholesterol Transport (GO:0032376)	1931-02-01	0.131803	0.600848	3.31475	6.71716	ABCA3;ABCA8
Positive Regulation Of Proteolysis Involved In Protein Catabolic Process (GO:1903052)	1931-02-01	0.131803	0.600848	3.31475	6.71716	CAV3;DAB2IP
Positive Regulation Of DNA-binding Transcription Factor Activity (GO:0051091)	8/246	0.133135	0.600848	1.62225	3.27109	SMAD3;SPHK1;FLOT2;TRIM37;CARD14;HSPA1B;RNF220;HSPA1A
Glycerophospholipid Metabolic Process (GO:0006650)	1962-03-01	0.133565	0.600848	2.44619	4.92459	LCAT;PGPEP1;PIGG
Negative Regulation Of Kinase Activity (GO:0033673)	1962-03-01	0.133565	0.600848	2.44619	4.92459	CAV3;NPRL2;DUSP19
Protein-Containing Complex Disassembly (GO:0032984)	1962-03-01	0.133565	0.600848	2.44619	4.92459	PEX5;VPS4A;TECPR1
Positive Regulation Of Supramolecular Fiber Organization (GO:1902905)	1996-04-01	0.133934	0.600848	2.09329	4.20836	CAV3;BIN1;PTK2B;BAIAP2
ATP Synthesis Coupled Electron Transport (GO:0042773)	2024-07-01	0.13468	0.600848	8.00041	16.0397	MTCO2P12
Regulation Of Chromosome Condensation (GO:0060623)	2024-07-01	0.13468	0.600848	8.00041	16.0397	SMC4
Regulation Of Cilium Beat Frequency (GO:0003356)	2024-07-01	0.13468	0.600848	8.00041	16.0397	CCDC40
DNA Dealkylation (GO:0035510)	2024-07-01	0.13468	0.600848	8.00041	16.0397	ALKBH2
DNA Dealkylation Involved In DNA Repair (GO:0006307)	2024-07-01	0.13468	0.600848	8.00041	16.0397	ALKBH2
Regulation Of Epithelial To Mesenchymal Transition Involved In Endocardial Cushion Formation (GO:1905005)	2024-07-01	0.13468	0.600848	8.00041	16.0397	TGFBR2
Regulation Of Establishment Of Protein Localization To Mitochondrion (GO:1903747)	2024-07-01	0.13468	0.600848	8.00041	16.0397	SREBF1
SREBP Signaling Pathway (GO:0032933)	2024-07-01	0.13468	0.600848	8.00041	16.0397	SREBF1
UV Protection (GO:0009650)	2024-07-01	0.13468	0.600848	8.00041	16.0397	MC1R
Benzene-Containing Compound Metabolic Process (GO:0042537)	2024-07-01	0.13468	0.600848	8.00041	16.0397	CYP2E1
Regulation Of Protein Localization To Cilium (GO:1903564)	2024-07-01	0.13468	0.600848	8.00041	16.0397	LZTFL1
Cellular Biogenic Amine Catabolic Process (GO:0042402)	2024-07-01	0.13468	0.600848	8.00041	16.0397	DMGDH
Cellular Response To Epinephrine Stimulus (GO:0071872)	2024-07-01	0.13468	0.600848	8.00041	16.0397	PDE4B
Regulation Of Transforming Growth Factor Beta Activation (GO:1901388)	2024-07-01	0.13468	0.600848	8.00041	16.0397	ITGB6
Regulation Of Triglyceride Metabolic Process (GO:0090207)	2024-07-01	0.13468	0.600848	8.00041	16.0397	SREBF1
Collecting Duct Development (GO:0072044)	2024-07-01	0.13468	0.600848	8.00041	16.0397	PAX2
Response To Epinephrine (GO:0071871)	2024-07-01	0.13468	0.600848	8.00041	16.0397	PDE4B
Cyclic Nucleotide Transport (GO:0070729)	2024-07-01	0.13468	0.600848	8.00041	16.0397	LRRC8E
Endonucleolytic Cleavage In ITS1 To Separate SSU-rRNA From 5.8S rRNA And LSU-rRNA From Tricistronic rRNA Transcript (SSU-rRNA, 5.8S rRNA, LSU-rRNA) (GO:0000447)	2024-07-01	0.13468	0.600848	8.00041	16.0397	LTB4R2
Sodium-Dependent Phosphate Transport (GO:0044341)	2024-07-01	0.13468	0.600848	8.00041	16.0397	SLC34A1
tRNA Transcription By RNA Polymerase III (GO:0042797)	2024-07-01	0.13468	0.600848	8.00041	16.0397	POLR2F
Terpenoid Metabolic Process (GO:0006721)	2024-07-01	0.13468	0.600848	8.00041	16.0397	CYP2E1
Glycoside Catabolic Process (GO:0016139)	2024-07-01	0.13468	0.600848	8.00041	16.0397	GUSB
Very-Low-Density Lipoprotein Particle Remodeling (GO:0034372)	2024-07-01	0.13468	0.600848	8.00041	16.0397	LCAT
Kidney Epithelium Development (GO:0072073)	2024-07-01	0.13468	0.600848	8.00041	16.0397	PAX2
Kidney Mesenchyme Development (GO:0072074)	2024-07-01	0.13468	0.600848	8.00041	16.0397	PAX2
Monosaccharide Biosynthetic Process (GO:0046364)	2024-07-01	0.13468	0.600848	8.00041	16.0397	G6PD
Negative Regulation Of miRNA-mediated Gene Silencing (GO:0060965)	2024-07-01	0.13468	0.600848	8.00041	16.0397	ZSWIM8
Negative Regulation Of Monooxygenase Activity (GO:0032769)	2024-07-01	0.13468	0.600848	8.00041	16.0397	CAV3
Negative Regulation Of Muscle Cell Differentiation (GO:0051148)	2024-07-01	0.13468	0.600848	8.00041	16.0397	IGF2
Negative Regulation Of Muscle Hypertrophy (GO:0014741)	2024-07-01	0.13468	0.600848	8.00041	16.0397	CAV3
Neuron Projection Arborization (GO:0140058)	2024-07-01	0.13468	0.600848	8.00041	16.0397	LRP2
Olefinic Compound Biosynthetic Process (GO:0120255)	2024-07-01	0.13468	0.600848	8.00041	16.0397	FSHB
Positive Regulation Of Cardiac Epithelial To Mesenchymal Transition (GO:0062043)	2024-07-01	0.13468	0.600848	8.00041	16.0397	TGFBR2
Positive Regulation Of Chromosome Condensation (GO:1905821)	2024-07-01	0.13468	0.600848	8.00041	16.0397	SMC4
Positive Regulation Of Steroid Biosynthetic Process (GO:0010893)	2024-07-01	0.13468	0.600848	8.00041	16.0397	FSHB
Preassembly Of GPI Anchor In ER Membrane (GO:0016254)	2024-07-01	0.13468	0.600848	8.00041	16.0397	PIGG
Regulation Of Alpha-Beta T Cell Differentiation (GO:0046637)	2024-07-01	0.13468	0.600848	8.00041	16.0397	ZNF683
Regulation Of Apoptotic Cell Clearance (GO:2000425)	2024-07-01	0.13468	0.600848	8.00041	16.0397	TGM2
Protein Stabilization (GO:0050821)	7/208	0.135532	0.600848	1.67979	3.35713	HSP90AA2P;HSP90AB2P;FLOT2;TRIM37;CPN2;HSPA1B;HSPA1A
Regulation Of Cholesterol Efflux (GO:0010874)	1932-02-01	0.138779	0.600848	3.2041	6.32767	ABCA3;ABCA8
Cellular Nitrogen Compound Biosynthetic Process (GO:0044271)	1932-02-01	0.138779	0.600848	3.2041	6.32767	SPHK1;SULT1A2
miRNA Processing (GO:0035196)	1932-02-01	0.138779	0.600848	3.2041	6.32767	SMAD3;AGO2
Negative Regulation Of Fat Cell Differentiation (GO:0045599)	1932-02-01	0.138779	0.600848	3.2041	6.32767	TRIO;SMAD3
Neural Tube Closure (GO:0001843)	1932-02-01	0.138779	0.600848	3.2041	6.32767	LRP2;PAX2
Phosphatidylinositol 3-Kinase Signaling (GO:0014065)	1932-02-01	0.138779	0.600848	3.2041	6.32767	TYRO3;PIK3R2
Protein Transmembrane Import Into Intracellular Organelle (GO:0044743)	1932-02-01	0.138779	0.600848	3.2041	6.32767	PEX5;TRIM37
Proteoglycan Biosynthetic Process (GO:0030166)	1932-02-01	0.138779	0.600848	3.2041	6.32767	XYLT2;EXTL3
Purine Ribonucleoside Triphosphate Metabolic Process (GO:0009205)	1932-02-01	0.138779	0.600848	3.2041	6.32767	HSPA1B;HSPA1A
Vesicle-Mediated Transport (GO:0016192)	12/411	0.138859	0.600848	1.45391	2.87045	RPH3A;CAV3;TBC1D4;BIN1;FHIP1B;VPS4A;CADPS;ARL1;CLEC16A;LRP2;AP1M1;STX10
Antigen Receptor-Mediated Signaling Pathway (GO:0050851)	5/134	0.140505	0.600848	1.86718	3.66436	BTNL9;BTN2A2;LCK;PDE4B;CD276
Negative Regulation Of Cell Death (GO:0060548)	1964-03-01	0.142982	0.600848	2.36574	4.60146	VPS4A;PAX2;HSPA1B
Regulation Of Potassium Ion Transmembrane Transport (GO:1901379)	1933-02-01	0.145834	0.600848	3.10058	5.96951	CAV3;BIN1
Vasculogenesis (GO:0001570)	1933-02-01	0.145834	0.600848	3.10058	5.96951	RAMP2;TGFBR2
Inositol Lipid-Mediated Signaling (GO:0048017)	1933-02-01	0.145834	0.600848	3.10058	5.96951	PI4KB;PLCH2
Positive Regulation Of Protein Dephosphorylation (GO:0035307)	1933-02-01	0.145834	0.600848	3.10058	5.96951	ANKLE2;AMBRA1
Regulation Of Activated T Cell Proliferation (GO:0046006)	1933-02-01	0.145834	0.600848	3.10058	5.96951	BTN2A2;IGF2
Regulation Of Cell-Matrix Adhesion (GO:0001952)	1965-03-01	0.147771	0.600848	2.32747	4.45032	MACF1;PTPRA;PTK2B
Regulation Of Glucan Biosynthetic Process (GO:0010962)	2024-08-01	0.152382	0.600848	6.85714	12.9008	PPP1R3B
RISC Complex Assembly (GO:0070922)	2024-08-01	0.152382	0.600848	6.85714	12.9008	AGO2
Regulation Of Heme Biosynthetic Process (GO:0070453)	2024-08-01	0.152382	0.600848	6.85714	12.9008	SLC6A9
RNA Secondary Structure Unwinding (GO:0010501)	2024-08-01	0.152382	0.600848	6.85714	12.9008	AGO2
UDP-N-acetylglucosamine Biosynthetic Process (GO:0006048)	2024-08-01	0.152382	0.600848	6.85714	12.9008	GFPT2
Regulation Of Lysosomal Protein Catabolic Process (GO:1905165)	2024-08-01	0.152382	0.600848	6.85714	12.9008	LRP2
Regulation Of Macrophage Migration (GO:1905521)	2024-08-01	0.152382	0.600848	6.85714	12.9008	PTK2B
Regulation Of miRNA Metabolic Process (GO:2000628)	2024-08-01	0.152382	0.600848	6.85714	12.9008	SMAD3
Regulation Of Nephron Tubule Epithelial Cell Differentiation (GO:0072182)	2024-08-01	0.152382	0.600848	6.85714	12.9008	PAX2
Bone Resorption (GO:0045453)	2024-08-01	0.152382	0.600848	6.85714	12.9008	PTK2B
Regulation Of Sister Chromatid Cohesion (GO:0007063)	2024-08-01	0.152382	0.600848	6.85714	12.9008	ESPL1
Regulation Of Toll-Like Receptor 3 Signaling Pathway (GO:0034139)	2024-08-01	0.152382	0.600848	6.85714	12.9008	FLOT2
Cellular Response To Sterol Depletion (GO:0071501)	2024-08-01	0.152382	0.600848	6.85714	12.9008	SREBF1
Regulation Of Vesicle Fusion (GO:0031338)	2024-08-01	0.152382	0.600848	6.85714	12.9008	SPHK1
Cobalamin Transport (GO:0015889)	2024-08-01	0.152382	0.600848	6.85714	12.9008	LRP2
Collagen-Activated Signaling Pathway (GO:0038065)	2024-08-01	0.152382	0.600848	6.85714	12.9008	COL4A6
Response To Leptin (GO:0044321)	2024-08-01	0.152382	0.600848	6.85714	12.9008	LRP2
Sequestering Of Actin Monomers (GO:0042989)	2024-08-01	0.152382	0.600848	6.85714	12.9008	PFN4
Endosome To Melanosome Transport (GO:0035646)	2024-08-01	0.152382	0.600848	6.85714	12.9008	AP1M1
Endosome To Pigment Granule Transport (GO:0043485)	2024-08-01	0.152382	0.600848	6.85714	12.9008	AP1M1
Sphingosine-1-Phosphate Receptor Signaling Pathway (GO:0003376)	2024-08-01	0.152382	0.600848	6.85714	12.9008	SPNS2
tRNA Transcription (GO:0009304)	2024-08-01	0.152382	0.600848	6.85714	12.9008	POLR2F
Triglyceride-Rich Lipoprotein Particle Remodeling (GO:0034370)	2024-08-01	0.152382	0.600848	6.85714	12.9008	LCAT
Vascular Associated Smooth Muscle Cell Differentiation (GO:0035886)	2024-08-01	0.152382	0.600848	6.85714	12.9008	RAMP2
Negative Regulation Of Chromosome Organization (GO:2001251)	2024-08-01	0.152382	0.600848	6.85714	12.9008	ESPL1
Negative Regulation Of Glycoprotein Biosynthetic Process (GO:0010561)	2024-08-01	0.152382	0.600848	6.85714	12.9008	AGO2
Negative Regulation Of Retrograde Protein Transport, ER To Cytosol (GO:1904153)	2024-08-01	0.152382	0.600848	6.85714	12.9008	DERL3
Negative Regulation Of Triglyceride Metabolic Process (GO:0090209)	2024-08-01	0.152382	0.600848	6.85714	12.9008	SREBF1
Nucleic Acid Transport (GO:0050657)	2024-08-01	0.152382	0.600848	6.85714	12.9008	SIDT2
Positive Regulation Of NK T Cell Activation (GO:0051135)	2024-08-01	0.152382	0.600848	6.85714	12.9008	RASAL3
Positive Regulation Of Extracellular Matrix Assembly (GO:1901203)	2024-08-01	0.152382	0.600848	6.85714	12.9008	SMAD3
Positive Regulation Of Mitochondrial Calcium Ion Concentration (GO:0051561)	2024-08-01	0.152382	0.600848	6.85714	12.9008	TGM2
Positive Regulation Of Peptide Secretion (GO:0002793)	2024-08-01	0.152382	0.600848	6.85714	12.9008	TFR2
Positive Regulation Of Protein Kinase C Signaling (GO:0090037)	2024-08-01	0.152382	0.600848	6.85714	12.9008	MC1R
Protein K29-linked Ubiquitination (GO:0035519)	2024-08-01	0.152382	0.600848	6.85714	12.9008	UBE3C
Protein Localization To Perinuclear Region Of Cytoplasm (GO:1905719)	2024-08-01	0.152382	0.600848	6.85714	12.9008	FHIP1B
Regulation Of ER-associated Ubiquitin-Dependent Protein Catabolic Process (GO:1903069)	2024-08-01	0.152382	0.600848	6.85714	12.9008	HERPUD1
Regulation Of Aspartic-Type Endopeptidase Activity Involved In Amyloid Precursor Protein Catabolic Process (GO:1902959)	2024-08-01	0.152382	0.600848	6.85714	12.9008	BIN1
Hemopoiesis (GO:0030097)	4/101	0.15261	0.600848	1.98488	3.73132	ARMC6;LCK;TGFBR2;FSTL3
Regulation Of Endocytosis (GO:0030100)	1966-03-01	0.152612	0.600848	2.29041	4.30563	CD151;TFR2;SPHK1
Sister Chromatid Segregation (GO:0000819)	1934-02-01	0.15296	0.600848	3.00353	5.63936	ESPL1;SMC4
Negative Regulation Of Ras Protein Signal Transduction (GO:0046580)	1934-02-01	0.15296	0.600848	3.00353	5.63936	DAB2IP;RASAL3
Purine Nucleotide Metabolic Process (GO:0006163)	1934-02-01	0.15296	0.600848	3.00353	5.63936	G6PD;FHIT
Regulation Of Neurogenesis (GO:0050767)	1967-03-01	0.157503	0.600848	2.2545	4.16703	BHLHE40;LRP2;TGM2
Extrinsic Apoptotic Signaling Pathway (GO:0097191)	1967-03-01	0.157503	0.600848	2.2545	4.16703	DAXX;SMAD3;DAB2IP
Endoderm Formation (GO:0001706)	1935-02-01	0.160153	0.600848	2.91237	5.33436	DUSP4;COL7A1
Liver Development (GO:0001889)	1935-02-01	0.160153	0.600848	2.91237	5.33436	PHF1;CCDC40
Positive Regulation Of Cell Development (GO:0010720)	1935-02-01	0.160153	0.600848	2.91237	5.33436	LRP2;TGM2
Positive Regulation Of Mitotic Nuclear Division (GO:0045840)	1935-02-01	0.160153	0.600848	2.91237	5.33436	ESPL1;IGF2
Regulation Of Cardiac Muscle Contraction (GO:0055117)	1935-02-01	0.160153	0.600848	2.91237	5.33436	CAV3;PDE4B
Aerobic Electron Transport Chain (GO:0019646)	1968-03-01	0.162441	0.600848	2.2197	4.03418	COX4I1;MTCO2P12;COX6A1
Positive Regulation Of Kinase Activity (GO:0033674)	4/104	0.164263	0.600848	1.92504	3.47717	DAXX;TYRO3;DUSP19;PTK2B
Positive Regulation Of Vasculature Development (GO:1904018)	4/104	0.164263	0.600848	1.92504	3.47717	RAMP2;SPHK1;AGO2;CCR3
Endosomal Transport (GO:0016197)	6/180	0.164395	0.600848	1.66142	2.99966	VPS4A;ARL1;CLEC16A;VPS26B;PHETA1;STX10
COPII-coated Vesicle Budding (GO:0090114)	1936-02-01	0.167406	0.600848	2.82656	5.05201	TRAPPC6A;SEC24D
Regulation Of Erythrocyte Differentiation (GO:0045646)	1936-02-01	0.167406	0.600848	2.82656	5.05201	HSPA1B;HSPA1A
Regulation Of Peptidyl-Threonine Phosphorylation (GO:0010799)	1936-02-01	0.167406	0.600848	2.82656	5.05201	SPHK1;TNKS1BP1
Lytic Vacuole Organization (GO:0080171)	1936-02-01	0.167406	0.600848	2.82656	5.05201	FHIP1B;PI4KB
Negative Regulation Of Organelle Assembly (GO:1902116)	1936-02-01	0.167406	0.600848	2.82656	5.05201	CAV3;TRIM37
Positive Regulation Of Myeloid Cell Differentiation (GO:0045639)	1936-02-01	0.167406	0.600848	2.82656	5.05201	HSPA1B;HSPA1A
Regulation Of Monoatomic Ion Transmembrane Transporter Activity (GO:0032412)	1969-03-01	0.167425	0.600848	2.18596	3.90679	CAV3;PTK2B;RANGRF
Phagocytosis (GO:0006909)	1969-03-01	0.167425	0.600848	2.18596	3.90679	MSR1;TYRO3;TGM2
Negative Regulation Of MAPK Cascade (GO:0043409)	4/105	0.168216	0.600848	1.90588	3.39724	DUSP4;CAV3;DAB2IP;PIK3R2
Regulation Of Cellular Response To Oxidative Stress (GO:1900407)	2024-09-01	0.169722	0.600848	5.99969	10.641	FBLN5
Regulation Of Ceramide Biosynthetic Process (GO:2000303)	2024-09-01	0.169722	0.600848	5.99969	10.641	SPHK1
ESCRT III Complex Disassembly (GO:1904903)	2024-09-01	0.169722	0.600848	5.99969	10.641	VPS4A
ESCRT Complex Disassembly (GO:1904896)	2024-09-01	0.169722	0.600848	5.99969	10.641	VPS4A
I-kappaB Phosphorylation (GO:0007252)	2024-09-01	0.169722	0.600848	5.99969	10.641	DAB2IP
Regulation Of Hair Cycle (GO:0042634)	2024-09-01	0.169722	0.600848	5.99969	10.641	TRPV3
Regulation Of High Voltage-Gated Calcium Channel Activity (GO:1901841)	2024-09-01	0.169722	0.600848	5.99969	10.641	PDE4B
Regulation Of Inflammatory Response To Wounding (GO:0106014)	2024-09-01	0.169722	0.600848	5.99969	10.641	EXTL3
Adherens Junction Assembly (GO:0034333)	2024-09-01	0.169722	0.600848	5.99969	10.641	RAMP2
Alpha-Linolenic Acid Metabolic Process (GO:0036109)	2024-09-01	0.169722	0.600848	5.99969	10.641	RAPSN
Amine Metabolic Process (GO:0009308)	2024-09-01	0.169722	0.600848	5.99969	10.641	SULT1A2
Amino Sugar Biosynthetic Process (GO:0046349)	2024-09-01	0.169722	0.600848	5.99969	10.641	GFPT2
Amino Sugar Metabolic Process (GO:0006040)	2024-09-01	0.169722	0.600848	5.99969	10.641	GFPT2
Aminoglycan Metabolic Process (GO:0006022)	2024-09-01	0.169722	0.600848	5.99969	10.641	XYLT2
Aspartate Transmembrane Transport (GO:0015810)	2024-09-01	0.169722	0.600848	5.99969	10.641	LRRC8E
Autophagy Of Peroxisome (GO:0030242)	2024-09-01	0.169722	0.600848	5.99969	10.641	PEX5
Carbohydrate Phosphorylation (GO:0046835)	2024-09-01	0.169722	0.600848	5.99969	10.641	TKFC
Carnitine Metabolic Process (GO:0009437)	2024-09-01	0.169722	0.600848	5.99969	10.641	CPT1C
Cell Differentiation Involved In Metanephros Development (GO:0072202)	2024-09-01	0.169722	0.600848	5.99969	10.641	PAX2
Regulation Of Sequestering Of Calcium Ion (GO:0051282)	2024-09-01	0.169722	0.600848	5.99969	10.641	PTK2B
Regulation Of Store-Operated Calcium Entry (GO:2001256)	2024-09-01	0.169722	0.600848	5.99969	10.641	SLC8B1
Regulation Of Viral-Induced Cytoplasmic Pattern Recognition Receptor Signaling Pathway (GO:0039531)	2024-09-01	0.169722	0.600848	5.99969	10.641	FLOT2
Chondroitin Sulfate Proteoglycan Metabolic Process (GO:0050654)	2024-09-01	0.169722	0.600848	5.99969	10.641	XYLT2
Dopamine Transport (GO:0015872)	2024-09-01	0.169722	0.600848	5.99969	10.641	TGM2
Smooth Muscle Tissue Development (GO:0048745)	2024-09-01	0.169722	0.600848	5.99969	10.641	MYLK
Epithelial Cilium Movement Involved In Determination Of Left/Right Asymmetry (GO:0060287)	2024-09-01	0.169722	0.600848	5.99969	10.641	CCDC40
Fructose 6-Phosphate Metabolic Process (GO:0006002)	2024-09-01	0.169722	0.600848	5.99969	10.641	GFPT2
Transferrin Transport (GO:0033572)	2024-09-01	0.169722	0.600848	5.99969	10.641	TFR2
Glycerolipid Metabolic Process (GO:0046486)	2024-09-01	0.169722	0.600848	5.99969	10.641	PGPEP1
Homocysteine Metabolic Process (GO:0050667)	2024-09-01	0.169722	0.600848	5.99969	10.641	CBS
Ketone Biosynthetic Process (GO:0042181)	2024-09-01	0.169722	0.600848	5.99969	10.641	FSHB
Long-Chain Fatty Acid Import Into Cell (GO:0044539)	2024-09-01	0.169722	0.600848	5.99969	10.641	SLC27A5
Mesenchymal To Epithelial Transition (GO:0060231)	2024-09-01	0.169722	0.600848	5.99969	10.641	PAX2
Mitochondrial Ribosome Assembly (GO:0061668)	2024-09-01	0.169722	0.600848	5.99969	10.641	DHX30
Mitotic Nuclear Membrane Organization (GO:0101024)	2024-09-01	0.169722	0.600848	5.99969	10.641	VPS4A
Mitotic Nuclear Membrane Reassembly (GO:0007084)	2024-09-01	0.169722	0.600848	5.99969	10.641	VPS4A
Myeloid Dendritic Cell Differentiation (GO:0043011)	2024-09-01	0.169722	0.600848	5.99969	10.641	TGFBR2
Negative Regulation Of Potassium Ion Transmembrane Transporter Activity (GO:1901017)	2024-09-01	0.169722	0.600848	5.99969	10.641	CAV3
Negative Regulation Of Protein Exit From Endoplasmic Reticulum (GO:0070862)	2024-09-01	0.169722	0.600848	5.99969	10.641	DERL3
Negative Regulation Of Protein Localization To Cell Surface (GO:2000009)	2024-09-01	0.169722	0.600848	5.99969	10.641	CAV3
Negative Regulation Of Toll-Like Receptor 4 Signaling Pathway (GO:0034144)	2024-09-01	0.169722	0.600848	5.99969	10.641	DAB2IP
Negative Regulation Of Vascular Endothelial Growth Factor Signaling Pathway (GO:1900747)	2024-09-01	0.169722	0.600848	5.99969	10.641	DAB2IP
Nucleoside Metabolic Process (GO:0009116)	2024-09-01	0.169722	0.600848	5.99969	10.641	MACROD1
Phosphatidylethanolamine Biosynthetic Process (GO:0006646)	2024-09-01	0.169722	0.600848	5.99969	10.641	SFI1
Positive Regulation Of Epidermis Development (GO:0045684)	2024-09-01	0.169722	0.600848	5.99969	10.641	ELAPOR2
Positive Regulation Of Establishment Of Protein Localization To Telomere (GO:1904851)	2024-09-01	0.169722	0.600848	5.99969	10.641	WRAP53
Positive Regulation Of Mesenchymal Cell Proliferation (GO:0002053)	2024-09-01	0.169722	0.600848	5.99969	10.641	TGFBR2
Positive Regulation Of Monocyte Differentiation (GO:0045657)	2024-09-01	0.169722	0.600848	5.99969	10.641	IL34
Positive Regulation Of Protein Kinase A Signaling (GO:0010739)	2024-09-01	0.169722	0.600848	5.99969	10.641	MC1R
Positive Regulation Of Smooth Muscle Contraction (GO:0045987)	2024-09-01	0.169722	0.600848	5.99969	10.641	SPHK1
Primary Alcohol Catabolic Process (GO:0034310)	2024-09-01	0.169722	0.600848	5.99969	10.641	SULT1A2
Regulation Of CD4-positive, Alpha-Beta T Cell Proliferation (GO:2000561)	2024-09-01	0.169722	0.600848	5.99969	10.641	TGFBR2
Regulation Of Actin Filament-Based Movement (GO:1903115)	2024-09-01	0.169722	0.600848	5.99969	10.641	PDE4B
Sulfur Compound Biosynthetic Process (GO:0044272)	1970-03-01	0.172453	0.600848	2.15322	3.78457	CBS;XYLT2;EXTL3
Mitochondrial ATP Synthesis Coupled Electron Transport (GO:0042775)	1970-03-01	0.172453	0.600848	2.15322	3.78457	COX4I1;MTCO2P12;COX6A1
Regulation Of Sodium Ion Transmembrane Transporter Activity (GO:2000649)	1937-02-01	0.174715	0.600848	2.74567	4.79009	CAV3;RANGRF
Positive Regulation Of Exocytosis (GO:0045921)	1937-02-01	0.174715	0.600848	2.74567	4.79009	VPS4A;CADPS
Phosphate-Containing Compound Metabolic Process (GO:0006796)	6/184	0.176248	0.600848	1.62375	2.8186	DUSP4;G6PD;SLC34A1;GFPT2;SPHK1;LCAT
Negative Regulation Of Cellular Response To Growth Factor Stimulus (GO:0090288)	1971-03-01	0.177524	0.600848	2.12145	3.66724	DAB2IP;LRP2;FSTL3
Lipid Transport (GO:0006869)	4/108	0.180275	0.600848	1.85062	3.17061	ABCA3;SPNS2;ABCA8;SLC27A5
Protein Ubiquitination (GO:0016567)	12/434	0.180748	0.600848	1.37302	2.34876	TRIM7;UBE3C;NEURL1;ZSWIM8;RNF39;MIB2;KEAP1;TRIM37;AMBRA1;RNF220;FAAP100;BSPRY
Amino Acid Catabolic Process (GO:0009063)	1938-02-01	0.182073	0.600848	2.66926	4.54667	CBS;SLC25A44
Regulation Of Protein Import Into Nucleus (GO:0042306)	1938-02-01	0.182073	0.600848	2.66926	4.54667	SMAD3;PIK3R2
Tumor Necrosis Factor-Mediated Signaling Pathway (GO:0033209)	1938-02-01	0.182073	0.600848	2.66926	4.54667	PTK2B;CARD14
Heart Looping (GO:0001947)	1938-02-01	0.182073	0.600848	2.66926	4.54667	TGFBR2;CCDC40
Import Into Cell (GO:0098657)	1938-02-01	0.182073	0.600848	2.66926	4.54667	LRP2;LRRC8E
Transforming Growth Factor Beta Receptor Signaling Pathway (GO:0007179)	1972-03-01	0.182636	0.600848	2.0906	3.55456	SMAD3;FSHB;TGFBR2
Plasma Membrane Organization (GO:0007009)	1972-03-01	0.182636	0.600848	2.0906	3.55456	CAV3;BIN1;VPS4A
Protein Localization (GO:0008104)	10/351	0.184235	0.600848	1.41483	2.39324	COPB2;CAV3;FHIP1B;PEX5;ARL1;VPS26B;SNX8;FBLN5;STX10;CNTLN
Regulation Of Establishment Of Protein Localization To Telomere (GO:0070203)	2024-10-01	0.186709	0.600848	5.33279	8.9495	WRAP53
Regulation Of Gene Expression By Genomic Imprinting (GO:0006349)	2024-10-01	0.186709	0.600848	5.33279	8.9495	IGF2
UDP-N-acetylglucosamine Metabolic Process (GO:0006047)	2024-10-01	0.186709	0.600848	5.33279	8.9495	GFPT2
Actin Filament Depolymerization (GO:0030042)	2024-10-01	0.186709	0.600848	5.33279	8.9495	MICAL3
Regulation Of Long-Term Neuronal Synaptic Plasticity (GO:0048169)	2024-10-01	0.186709	0.600848	5.33279	8.9495	NEURL1
Alpha-Amino Acid Biosynthetic Process (GO:1901607)	2024-10-01	0.186709	0.600848	5.33279	8.9495	SDSL
Basement Membrane Organization (GO:0071711)	2024-10-01	0.186709	0.600848	5.33279	8.9495	RAMP2
Branched-Chain Amino Acid Transport (GO:0015803)	2024-10-01	0.186709	0.600848	5.33279	8.9495	SLC25A44
Response To Sterol (GO:0036314)	2024-10-01	0.186709	0.600848	5.33279	8.9495	TGFBR2
Diol Metabolic Process (GO:0034311)	2024-10-01	0.186709	0.600848	5.33279	8.9495	SPHK1
Signal Release (GO:0023061)	2024-10-01	0.186709	0.600848	5.33279	8.9495	TGM2
Endosomal Vesicle Fusion (GO:0034058)	2024-10-01	0.186709	0.600848	5.33279	8.9495	VPS4A
Epithelial Cell Apoptotic Process (GO:1904019)	2024-10-01	0.186709	0.600848	5.33279	8.9495	DAB2IP
Glycine Transport (GO:0015816)	2024-10-01	0.186709	0.600848	5.33279	8.9495	SLC6A9
Urogenital System Development (GO:0001655)	2024-10-01	0.186709	0.600848	5.33279	8.9495	PAX2
Histone H3-K14 Acetylation (GO:0044154)	2024-10-01	0.186709	0.600848	5.33279	8.9495	MBIP
Mesonephros Development (GO:0001823)	2024-10-01	0.186709	0.600848	5.33279	8.9495	PAX2
Metanephric Mesenchyme Development (GO:0072075)	2024-10-01	0.186709	0.600848	5.33279	8.9495	PAX2
miRNA Catabolic Process (GO:0010587)	2024-10-01	0.186709	0.600848	5.33279	8.9495	ZSWIM8
Negative Regulation Of Activin Receptor Signaling Pathway (GO:0032926)	2024-10-01	0.186709	0.600848	5.33279	8.9495	FSTL3
Negative Regulation Of Adenylate Cyclase Activity (GO:0007194)	2024-10-01	0.186709	0.600848	5.33279	8.9495	LTB4R2
Negative Regulation Of Centrosome Duplication (GO:0010826)	2024-10-01	0.186709	0.600848	5.33279	8.9495	TRIM37
Negative Regulation Of Mitochondrial Outer Membrane Permeabilization Involved In Apoptotic Signaling Pathway (GO:1901029)	2024-10-01	0.186709	0.600848	5.33279	8.9495	HSPA1A
Negative Regulation Of Pathway-Restricted SMAD Protein Phosphorylation (GO:0060394)	2024-10-01	0.186709	0.600848	5.33279	8.9495	LDLRAD4
Negative Regulation Of Vascular Endothelial Growth Factor Receptor Signaling Pathway (GO:0030948)	2024-10-01	0.186709	0.600848	5.33279	8.9495	DAB2IP
Phosphate Ion Transmembrane Transport (GO:0035435)	2024-10-01	0.186709	0.600848	5.33279	8.9495	SLC37A3
Positive Regulation Of Cholesterol Metabolic Process (GO:0090205)	2024-10-01	0.186709	0.600848	5.33279	8.9495	SREBF1
Positive Regulation Of Dendrite Development (GO:1900006)	2024-10-01	0.186709	0.600848	5.33279	8.9495	DAB2IP
Positive Regulation Of Macrophage Differentiation (GO:0045651)	2024-10-01	0.186709	0.600848	5.33279	8.9495	IL34
Purine Ribonucleoside Triphosphate Biosynthetic Process (GO:0009206)	2024-10-01	0.186709	0.600848	5.33279	8.9495	ATP5PO
Regulation Of ERAD Pathway (GO:1904292)	2024-10-01	0.186709	0.600848	5.33279	8.9495	HERPUD1
Regulation Of Amyloid Precursor Protein Biosynthetic Process (GO:0042984)	2024-10-01	0.186709	0.600848	5.33279	8.9495	AGO2
Cellular Response To Lipid (GO:0071396)	7/228	0.187397	0.600848	1.52619	2.55565	MAP4K1;DAB2IP;PDE4B;PTK2B;PAX2;HSPA1B;HSPA1A
Cellular Response To Reactive Oxygen Species (GO:0034614)	1973-03-01	0.187786	0.600848	2.06063	3.4463	PEX5;MPV17;PAX2
Ubiquitin-Dependent ERAD Pathway (GO:0030433)	1973-03-01	0.187786	0.600848	2.06063	3.4463	RHBDD2;DERL3;HERPUD1
Regulation Of JNK Cascade (GO:0046328)	4/110	0.18847	0.600848	1.81551	3.02976	MBIP;DUSP19;DAB2IP;PTK2B
Regulation Of Mitotic Spindle Organization (GO:0060236)	1939-02-01	0.189477	0.600848	2.59699	4.32006	HSPA1B;HSPA1A
Regulation Of Protein Tyrosine Kinase Activity (GO:0061097)	1939-02-01	0.189477	0.600848	2.59699	4.32006	SHC1;IL34
Positive Regulation Of Lipid Biosynthetic Process (GO:0046889)	1939-02-01	0.189477	0.600848	2.59699	4.32006	SREBF1;FSHB
T Cell Activation (GO:0042110)	4/111	0.192612	0.600848	1.79845	2.96219	LCK;PIK3R2;CD276;MICB
Regulation Of Transforming Growth Factor Beta Receptor Signaling Pathway (GO:0017015)	4/111	0.192612	0.600848	1.79845	2.96219	SMAD3;PEG10;LDLRAD4;HSPA1A
Positive Regulation Of Cell Migration (GO:0030335)	8/272	0.195142	0.600848	1.46052	2.38652	CD151;FSHB;SPHK1;AGO2;DAB2IP;PTK2B;ARHGEF7;MYLK
Regulation Of Cytokine-Mediated Signaling Pathway (GO:0001959)	1940-02-01	0.19692	0.600848	2.52851	4.10873	SPHK1;MIB2
Regulation Of Cytosolic Calcium Ion Concentration (GO:0051480)	1940-02-01	0.19692	0.600848	2.52851	4.10873	CAV3;SLC8B1
L-alpha-amino Acid Transmembrane Transport (GO:1902475)	1940-02-01	0.19692	0.600848	2.52851	4.10873	SLC6A9;SLC7A3
Negative Regulation Of Protein Localization (GO:1903828)	1940-02-01	0.19692	0.600848	2.52851	4.10873	CAV3;LZTFL1
Positive Regulation Of Neurogenesis (GO:0050769)	1975-03-01	0.198197	0.600848	2.00318	3.24214	NEURL1;LRP2;TGM2
Regulation Of BMP Signaling Pathway (GO:0030510)	1975-03-01	0.198197	0.600848	2.00318	3.24214	LRP2;ELAPOR2;FSTL3
Regulation Of Protein Ubiquitination (GO:0031396)	4/113	0.20098	0.600848	1.76527	2.83247	DAXX;SPHK1;HSPA1B;HSPA1A
Positive Regulation Of Cellular Component Organization (GO:0051130)	4/113	0.20098	0.600848	1.76527	2.83247	CD151;TFR2;NEURL1;DAB2IP
Regulation Of Glycogen Metabolic Process (GO:0070873)	2024-11-01	0.203349	0.600848	4.79926	7.64442	PPP1R3B
Actin Crosslink Formation (GO:0051764)	2024-11-01	0.203349	0.600848	4.79926	7.64442	BAIAP2
Regulation Of Leukocyte Cell-Cell Adhesion (GO:1903037)	2024-11-01	0.203349	0.600848	4.79926	7.64442	LCK
Regulation Of Lipid Kinase Activity (GO:0043550)	2024-11-01	0.203349	0.600848	4.79926	7.64442	PIK3R2
Regulation Of Mesenchymal Cell Proliferation (GO:0010464)	2024-11-01	0.203349	0.600848	4.79926	7.64442	TGFBR2
Regulation Of Microtubule-Based Movement (GO:0060632)	2024-11-01	0.203349	0.600848	4.79926	7.64442	CLXN
Aspartate Family Amino Acid Catabolic Process (GO:0009068)	2024-11-01	0.203349	0.600848	4.79926	7.64442	SDSL
Brain Morphogenesis (GO:0048854)	2024-11-01	0.203349	0.600848	4.79926	7.64442	PAX2
Central Nervous System Myelination (GO:0022010)	2024-11-01	0.203349	0.600848	4.79926	7.64442	TENM4
Central Nervous System Projection Neuron Axonogenesis (GO:0021952)	2024-11-01	0.203349	0.600848	4.79926	7.64442	SZT2
Cochlea Morphogenesis (GO:0090103)	2024-11-01	0.203349	0.600848	4.79926	7.64442	PAX2
Detection Of Light Stimulus Involved In Sensory Perception (GO:0050962)	2024-11-01	0.203349	0.600848	4.79926	7.64442	CACNA2D4
Detection Of Light Stimulus Involved In Visual Perception (GO:0050908)	2024-11-01	0.203349	0.600848	4.79926	7.64442	CACNA2D4
Sphingoid Metabolic Process (GO:0046519)	2024-11-01	0.203349	0.600848	4.79926	7.64442	SPHK1
Erythrocyte Development (GO:0048821)	2024-11-01	0.203349	0.600848	4.79926	7.64442	G6PD
Vitamin D Metabolic Process (GO:0042359)	2024-11-01	0.203349	0.600848	4.79926	7.64442	LRP2
Mitochondrial Genome Maintenance (GO:0000002)	2024-11-01	0.203349	0.600848	4.79926	7.64442	MPV17
Mitochondrion Distribution (GO:0048311)	2024-11-01	0.203349	0.600848	4.79926	7.64442	CLUH
Negative Regulation Of Cell Division (GO:0051782)	2024-11-01	0.203349	0.600848	4.79926	7.64442	VPS4A
Negative Regulation Of Cellular Response To Vascular Endothelial Growth Factor Stimulus (GO:1902548)	2024-11-01	0.203349	0.600848	4.79926	7.64442	DAB2IP
Negative Regulation Of Cyclase Activity (GO:0031280)	2024-11-01	0.203349	0.600848	4.79926	7.64442	LTB4R2
Negative Regulation Of Vascular Permeability (GO:0043116)	2024-11-01	0.203349	0.600848	4.79926	7.64442	RAMP2
Positive Regulation Of Branching Involved In Ureteric Bud Morphogenesis (GO:0090190)	2024-11-01	0.203349	0.600848	4.79926	7.64442	PAX2
Positive Regulation Of Endoplasmic Reticulum Unfolded Protein Response (GO:1900103)	2024-11-01	0.203349	0.600848	4.79926	7.64442	DAB2IP
Positive Regulation Of Lipid Transport (GO:0032370)	2024-11-01	0.203349	0.600848	4.79926	7.64442	ABCA3
Positive Regulation Of Metaphase/Anaphase Transition Of Cell Cycle (GO:1902101)	2024-11-01	0.203349	0.600848	4.79926	7.64442	ESPL1
Positive Regulation Of Mitotic Metaphase/Anaphase Transition (GO:0045842)	2024-11-01	0.203349	0.600848	4.79926	7.64442	ESPL1
Positive Regulation Of Muscle Contraction (GO:0045933)	2024-11-01	0.203349	0.600848	4.79926	7.64442	SPHK1
Positive Regulation Of Protein Localization To Chromosome, Telomeric Region (GO:1904816)	2024-11-01	0.203349	0.600848	4.79926	7.64442	WRAP53
Positive Regulation Of Protein Maturation (GO:1903319)	2024-11-01	0.203349	0.600848	4.79926	7.64442	TFR2
Positive Regulation Of Triglyceride Biosynthetic Process (GO:0010867)	2024-11-01	0.203349	0.600848	4.79926	7.64442	SREBF1
Regulation Of Alcohol Biosynthetic Process (GO:1902930)	2024-11-01	0.203349	0.600848	4.79926	7.64442	H6PD
Regulation Of Amyloid Precursor Protein Catabolic Process (GO:1902991)	2024-11-01	0.203349	0.600848	4.79926	7.64442	FLOT2
Regulation Of Dendrite Development (GO:0050773)	1941-02-01	0.204398	0.600848	2.46355	3.91135	SEZ6;DAB2IP
Axoneme Assembly (GO:0035082)	1941-02-01	0.204398	0.600848	2.46355	3.91135	RSPH1;CCDC40
Cellular Response To Retinoic Acid (GO:0071300)	1941-02-01	0.204398	0.600848	2.46355	3.91135	PTK2B;PAX2
Response To Amino Acid Starvation (GO:1990928)	1941-02-01	0.204398	0.600848	2.46355	3.91135	SZT2;NPRL2
Protein Localization To Lysosome (GO:0061462)	1941-02-01	0.204398	0.600848	2.46355	3.91135	SZT2;VPS4A
Regulation Of MAP Kinase Activity (GO:0043405)	4/114	0.205204	0.600848	1.74914	2.77019	CAV3;IL34;DUSP19;DAB2IP
Regulation Of Immune Response (GO:0050776)	1977-03-01	0.208743	0.600848	1.94884	3.05316	TKFC;SPNS2;CD276
Cell Morphogenesis Involved In Neuron Differentiation (GO:0048667)	1977-03-01	0.208743	0.600848	1.94884	3.05316	SLITRK2;BAIAP2;PAX2
Sphingolipid Biosynthetic Process (GO:0030148)	1977-03-01	0.208743	0.600848	1.94884	3.05316	SPHK1;SPNS2;ABCA8
Negative Regulation Of Transforming Growth Factor Beta Receptor Signaling Pathway (GO:0030512)	1977-03-01	0.208743	0.600848	1.94884	3.05316	PEG10;LDLRAD4;HSPA1A
Endoplasmic Reticulum To Golgi Vesicle-Mediated Transport (GO:0006888)	4/115	0.209455	0.600848	1.73329	2.70956	COPB2;TRAPPC6A;RANGRF;SEC24D
Branching Morphogenesis Of An Epithelial Tube (GO:0048754)	1942-02-01	0.211907	0.600848	2.40184	3.72672	PAX2;TGFBR2
Cellular Response To Amino Acid Starvation (GO:0034198)	1942-02-01	0.211907	0.600848	2.40184	3.72672	SZT2;NPRL2
Regulation Of Ubiquitin-Dependent Protein Catabolic Process (GO:2000058)	1942-02-01	0.211907	0.600848	2.40184	3.72672	CAV3;PTK2B
Determination Of Heart Left/Right Asymmetry (GO:0061371)	1942-02-01	0.211907	0.600848	2.40184	3.72672	TGFBR2;CCDC40
Embryonic Heart Tube Morphogenesis (GO:0003143)	1942-02-01	0.211907	0.600848	2.40184	3.72672	TGFBR2;CCDC40
Endomembrane System Organization (GO:0010256)	6/196	0.213745	0.600848	1.52026	2.34571	CAV3;FHIP1B;VPS4A;ARL1;ARHGEF7;PHETA1
Response To Insulin (GO:0032868)	1979-03-01	0.21941	0.600848	1.89736	2.87794	TBC1D4;PIK3R2;LPIN3
Negative Regulation Of Cellular Component Organization (GO:0051129)	1979-03-01	0.21941	0.600848	1.89736	2.87794	PEX5;HSPA1B;HSPA1A
Positive Regulation Of Cytoskeleton Organization (GO:0051495)	1979-03-01	0.21941	0.600848	1.89736	2.87794	BIN1;PTK2B;BAIAP2
Positive Regulation Of Protein Localization To Membrane (GO:1905477)	1979-03-01	0.21941	0.600848	1.89736	2.87794	TCAF1;MTCL1;RANGRF
Intracellular Glucose Homeostasis (GO:0001678)	1943-02-01	0.219442	0.600848	2.34314	3.55377	PIK3R2;PAX2
Lysosome Organization (GO:0007040)	1943-02-01	0.219442	0.600848	2.34314	3.55377	FHIP1B;PI4KB
mRNA Catabolic Process (GO:0006402)	1943-02-01	0.219442	0.600848	2.34314	3.55377	HSPA1B;HSPA1A
Negative Regulation Of BMP Signaling Pathway (GO:0030514)	1943-02-01	0.219442	0.600848	2.34314	3.55377	LRP2;FSTL3
Positive Regulation Of Cell-Matrix Adhesion (GO:0001954)	1943-02-01	0.219442	0.600848	2.34314	3.55377	COL16A1;PTK2B
Positive Regulation Of miRNA Transcription (GO:1902895)	1943-02-01	0.219442	0.600848	2.34314	3.55377	SREBF1;SMAD3
Regulation Of JUN Kinase Activity (GO:0043506)	1943-02-01	0.219442	0.600848	2.34314	3.55377	DUSP19;DAB2IP
Regulation Of Cell-Cell Adhesion (GO:0022407)	1943-02-01	0.219442	0.600848	2.34314	3.55377	FLOT2;FSTL3
Regulation Of Chromosome Separation (GO:1905818)	2024-12-01	0.21965	0.600848	4.36275	6.61271	SMC4
C4-dicarboxylate Transport (GO:0015740)	2024-12-01	0.21965	0.600848	4.36275	6.61271	LRRC8E
UV-damage Excision Repair (GO:0070914)	2024-12-01	0.21965	0.600848	4.36275	6.61271	MC1R
Attachment Of Mitotic Spindle Microtubules To Kinetochore (GO:0051315)	2024-12-01	0.21965	0.600848	4.36275	6.61271	KIF2C
Regulation Of Retrograde Protein Transport, ER To Cytosol (GO:1904152)	2024-12-01	0.21965	0.600848	4.36275	6.61271	DERL3
Regulation Of Sensory Perception (GO:0051931)	2024-12-01	0.21965	0.600848	4.36275	6.61271	ZFHX2
Response To Iron Ion (GO:0010039)	2024-12-01	0.21965	0.600848	4.36275	6.61271	TFR2
Secretion (GO:0046903)	2024-12-01	0.21965	0.600848	4.36275	6.61271	FBLN5
Sphingomyelin Metabolic Process (GO:0006684)	2024-12-01	0.21965	0.600848	4.36275	6.61271	ABCA8
Fatty Acid Transmembrane Transport (GO:1902001)	2024-12-01	0.21965	0.600848	4.36275	6.61271	SLC27A5
Gamma-Delta T Cell Activation (GO:0046629)	2024-12-01	0.21965	0.600848	4.36275	6.61271	MICB
Ionotropic Glutamate Receptor Signaling Pathway (GO:0035235)	2024-12-01	0.21965	0.600848	4.36275	6.61271	PTK2B
Lipid Droplet Formation (GO:0140042)	2024-12-01	0.21965	0.600848	4.36275	6.61271	SFI1
Mitochondrial Transcription (GO:0006390)	2024-12-01	0.21965	0.600848	4.36275	6.61271	MTERF2
Multicellular Organismal-Level Iron Ion Homeostasis (GO:0060586)	2024-12-01	0.21965	0.600848	4.36275	6.61271	TFR2
Myelination In Peripheral Nervous System (GO:0022011)	2024-12-01	0.21965	0.600848	4.36275	6.61271	NCMAP
Negative Regulation Of JUN Kinase Activity (GO:0043508)	2024-12-01	0.21965	0.600848	4.36275	6.61271	DUSP19
Negative Regulation Of Cardiac Muscle Hypertrophy (GO:0010614)	2024-12-01	0.21965	0.600848	4.36275	6.61271	CAV3
Negative Regulation Of Mitochondrial Membrane Permeability (GO:0035795)	2024-12-01	0.21965	0.600848	4.36275	6.61271	HSPA1A
Nuclear Body Organization (GO:0030575)	2024-12-01	0.21965	0.600848	4.36275	6.61271	WRAP53
Nucleotide Metabolic Process (GO:0009117)	2024-12-01	0.21965	0.600848	4.36275	6.61271	FHIT
Phosphate Ion Homeostasis (GO:0055062)	2024-12-01	0.21965	0.600848	4.36275	6.61271	SLC34A1
Positive Regulation Of CD4-positive, Alpha-Beta T Cell Activation (GO:2000516)	2024-12-01	0.21965	0.600848	4.36275	6.61271	TGFBR2
Positive Regulation Of ERAD Pathway (GO:1904294)	2024-12-01	0.21965	0.600848	4.36275	6.61271	HERPUD1
Positive Regulation Of Alcohol Biosynthetic Process (GO:1902932)	2024-12-01	0.21965	0.600848	4.36275	6.61271	SREBF1
Positive Regulation Of Insulin Receptor Signaling Pathway (GO:0046628)	2024-12-01	0.21965	0.600848	4.36275	6.61271	IGF2
Positive Regulation Of Neuron Migration (GO:2001224)	2024-12-01	0.21965	0.600848	4.36275	6.61271	DAB2IP
Positive Regulation Of Protein Localization To Cell Surface (GO:2000010)	2024-12-01	0.21965	0.600848	4.36275	6.61271	RANGRF
Positive Regulation Of Vascular Endothelial Cell Proliferation (GO:1905564)	2024-12-01	0.21965	0.600848	4.36275	6.61271	IGF2
pre-miRNA Processing (GO:0031054)	2024-12-01	0.21965	0.600848	4.36275	6.61271	AGO2
Primary miRNA Processing (GO:0031053)	2024-12-01	0.21965	0.600848	4.36275	6.61271	SMAD3
Regulation Of DNA-templated DNA Replication Initiation (GO:0030174)	2024-12-01	0.21965	0.600848	4.36275	6.61271	WRNIP1
Regulation Of SNARE Complex Assembly (GO:0035542)	2024-12-01	0.21965	0.600848	4.36275	6.61271	SEPTIN8
Central Nervous System Development (GO:0007417)	8/283	0.224453	0.600848	1.4013	2.09366	DHX30;ANKLE2;SZT2;ZFHX2;ZNF76;TBR1;SHROOM4;TGFBR2
Calcium Ion Transmembrane Transport (GO:0070588)	1980-03-01	0.224785	0.600848	1.87262	2.7951	TRPV3;CACNA2D4;SLC8B1
Wound Healing (GO:0042060)	1980-03-01	0.224785	0.600848	1.87262	2.7951	MACF1;SMAD3;VPS4A
Regulation Of Protein Kinase Activity (GO:0045859)	4/119	0.226696	0.600848	1.67266	2.48246	DAXX;CAV3;DUSP19;PTK2B
Positive Regulation Of Angiogenesis (GO:0045766)	4/119	0.226696	0.600848	1.67266	2.48246	RAMP2;SPHK1;AGO2;CCR3
Autophagosome Maturation (GO:0097352)	1944-02-01	0.226999	0.600848	2.28724	3.39153	VPS4A;TECPR1
Negative Regulation Of Immune System Process (GO:0002683)	1944-02-01	0.226999	0.600848	2.28724	3.39153	DAB2IP;TYRO3
Nucleus Organization (GO:0006997)	1944-02-01	0.226999	0.600848	2.28724	3.39153	BIN1;VPS4A
Phosphatidylinositol Phosphate Biosynthetic Process (GO:0046854)	1944-02-01	0.226999	0.600848	2.28724	3.39153	PIK3R2;PI4KB
Positive Regulation Of Cytokine-Mediated Signaling Pathway (GO:0001961)	1944-02-01	0.226999	0.600848	2.28724	3.39153	HSPA1B;HSPA1A
Positive Regulation Of Nucleocytoplasmic Transport (GO:0046824)	1944-02-01	0.226999	0.600848	2.28724	3.39153	SMAD3;PIK3R2
Organic Substance Transport (GO:0071702)	6/201	0.230129	0.600848	1.48089	2.17561	RAMP2;ABCA3;SPNS2;ABCA8;LRP2;SCAMP3
Activation Of Protein Kinase Activity (GO:0032147)	1981-03-01	0.230186	0.600848	1.84852	2.71524	PTK2B;CARD14;TGFBR2
Cytoskeleton-Dependent Cytokinesis (GO:0061640)	1981-03-01	0.230186	0.600848	1.84852	2.71524	ESPL1;VPS4A;SEPTIN8
Determination Of Left/Right Symmetry (GO:0007368)	1945-02-01	0.234575	0.600848	2.23393	3.23916	DNAH5;CCDC40
Epidermal Growth Factor Receptor Signaling Pathway (GO:0007173)	1945-02-01	0.234575	0.600848	2.23393	3.23916	SHC1;PTK2B
Hexose Metabolic Process (GO:0019318)	1945-02-01	0.234575	0.600848	2.23393	3.23916	G6PD;H6PD
Mitotic Nuclear Division (GO:0140014)	1945-02-01	0.234575	0.600848	2.23393	3.23916	ESPL1;SMC4
Regulation Of Flagellated Sperm Motility (GO:1901317)	2013-01-01	0.235617	0.600848	3.99898	5.78071	CLXN
Regulation Of Gastrulation (GO:0010470)	2013-01-01	0.235617	0.600848	3.99898	5.78071	TENM4
Regulation Of Humoral Immune Response (GO:0002920)	2013-01-01	0.235617	0.600848	3.99898	5.78071	SPNS2
Regulation Of Immune Effector Process (GO:0002697)	2013-01-01	0.235617	0.600848	3.99898	5.78071	ZNF683
Antigen Processing And Presentation Of Endogenous Peptide Antigen Via MHC Class I Via ER Pathway (GO:0002484)	2013-01-01	0.235617	0.600848	3.99898	5.78071	MICB
Antigen Processing And Presentation Of Endogenous Peptide Antigen Via MHC Class I Via ER Pathway, TAP-independent (GO:0002486)	2013-01-01	0.235617	0.600848	3.99898	5.78071	MICB
Antigen Processing And Presentation Of Endogenous Peptide Antigen Via MHC Class Ib (GO:0002476)	2013-01-01	0.235617	0.600848	3.99898	5.78071	MICB
Antigen Processing And Presentation Of Peptide Antigen Via MHC Class Ib (GO:0002428)	2013-01-01	0.235617	0.600848	3.99898	5.78071	MICB
Atrioventricular Valve Development (GO:0003171)	2013-01-01	0.235617	0.600848	3.99898	5.78071	TGFBR2
Regulation Of Oxidoreductase Activity (GO:0051341)	2013-01-01	0.235617	0.600848	3.99898	5.78071	SZT2
Branching Involved In Blood Vessel Morphogenesis (GO:0001569)	2013-01-01	0.235617	0.600848	3.99898	5.78071	TGFBR2
Cardiac Left Ventricle Morphogenesis (GO:0003214)	2013-01-01	0.235617	0.600848	3.99898	5.78071	TGFBR2
Cellular Modified Amino Acid Catabolic Process (GO:0042219)	2013-01-01	0.235617	0.600848	3.99898	5.78071	CBS
Cellular Response To Arsenic-Containing Substance (GO:0071243)	2013-01-01	0.235617	0.600848	3.99898	5.78071	DAXX
Regulation Of Trophoblast Cell Migration (GO:1901163)	2013-01-01	0.235617	0.600848	3.99898	5.78071	AGO2
Cranial Nerve Development (GO:0021545)	2013-01-01	0.235617	0.600848	3.99898	5.78071	PAX2
Cytoplasmic Sequestering Of Protein (GO:0051220)	2013-01-01	0.235617	0.600848	3.99898	5.78071	KEAP1
Cytoplasmic Sequestering Of Transcription Factor (GO:0042994)	2013-01-01	0.235617	0.600848	3.99898	5.78071	KEAP1
Secondary Palate Development (GO:0062009)	2013-01-01	0.235617	0.600848	3.99898	5.78071	TGFBR2
Embryonic Hemopoiesis (GO:0035162)	2013-01-01	0.235617	0.600848	3.99898	5.78071	TGFBR2
Endonucleolytic Cleavage Of Tricistronic rRNA Transcript (SSU-rRNA, 5.8S rRNA, LSU-rRNA) (GO:0000479)	2013-01-01	0.235617	0.600848	3.99898	5.78071	LTB4R2
Sphingoid Biosynthetic Process (GO:0046520)	2013-01-01	0.235617	0.600848	3.99898	5.78071	SPHK1
Sphingosine Biosynthetic Process (GO:0046512)	2013-01-01	0.235617	0.600848	3.99898	5.78071	SPHK1
Spliceosomal tri-snRNP Complex Assembly (GO:0000244)	2013-01-01	0.235617	0.600848	3.99898	5.78071	PRPF8
Extracellular Transport (GO:0006858)	2013-01-01	0.235617	0.600848	3.99898	5.78071	CCDC40
Immune Response-Regulating Cell Surface Receptor Signaling Pathway (GO:0002768)	2013-01-01	0.235617	0.600848	3.99898	5.78071	MICB
Mature B Cell Differentiation Involved In Immune Response (GO:0002313)	2013-01-01	0.235617	0.600848	3.99898	5.78071	PTK2B
Microtubule-Based Transport (GO:0099111)	2013-01-01	0.235617	0.600848	3.99898	5.78071	CCDC40
Myeloid Dendritic Cell Activation (GO:0001773)	2013-01-01	0.235617	0.600848	3.99898	5.78071	TGFBR2
Negative Regulation Of Bone Mineralization (GO:0030502)	2013-01-01	0.235617	0.600848	3.99898	5.78071	PTK2B
Negative Regulation Of Lyase Activity (GO:0051350)	2013-01-01	0.235617	0.600848	3.99898	5.78071	LTB4R2
Negative Regulation Of Toll-Like Receptor Signaling Pathway (GO:0034122)	2013-01-01	0.235617	0.600848	3.99898	5.78071	TYRO3
Nucleotide-Sugar Metabolic Process (GO:0009225)	2013-01-01	0.235617	0.600848	3.99898	5.78071	GFPT2
Positive Regulation Of T Cell Receptor Signaling Pathway (GO:0050862)	2013-01-01	0.235617	0.600848	3.99898	5.78071	LCK
Positive Regulation Of Alpha-Beta T Cell Differentiation (GO:0046638)	2013-01-01	0.235617	0.600848	3.99898	5.78071	TGFBR2
Positive Regulation Of Brown Fat Cell Differentiation (GO:0090336)	2013-01-01	0.235617	0.600848	3.99898	5.78071	FNDC5
Positive Regulation Of Cellular Response To Insulin Stimulus (GO:1900078)	2013-01-01	0.235617	0.600848	3.99898	5.78071	IGF2
Positive Regulation Of Chromosome Separation (GO:1905820)	2013-01-01	0.235617	0.600848	3.99898	5.78071	SMC4
Positive Regulation Of Double-Strand Break Repair Via Nonhomologous End Joining (GO:2001034)	2013-01-01	0.235617	0.600848	3.99898	5.78071	WRAP53
Positive Regulation Of Glycogen Biosynthetic Process (GO:0045725)	2013-01-01	0.235617	0.600848	3.99898	5.78071	IGF2
Positive Regulation Of Macrophage Chemotaxis (GO:0010759)	2013-01-01	0.235617	0.600848	3.99898	5.78071	IL34
Purine Ribonucleoside Bisphosphate Metabolic Process (GO:0034035)	2013-01-01	0.235617	0.600848	3.99898	5.78071	SULT1A2
Regulation Of IRE1-mediated Unfolded Protein Response (GO:1903894)	2013-01-01	0.235617	0.600848	3.99898	5.78071	DAB2IP
Regulation Of Cell Projection Organization (GO:0031344)	2013-01-01	0.235617	0.600848	3.99898	5.78071	MACF1
Epigenetic Regulation Of Gene Expression (GO:0040029)	1983-03-01	0.241057	0.600848	1.80212	2.56392	PHF1;IGF2;TRIM37
Vascular Transport (GO:0010232)	1983-03-01	0.241057	0.600848	1.80212	2.56392	SLC6A9;LRP2;SLC7A3
Regulation Of Fibroblast Proliferation (GO:0048145)	1946-02-01	0.242164	0.600848	2.18305	3.09586	SPHK1;DAB2IP
T Cell Differentiation (GO:0030217)	1946-02-01	0.242164	0.600848	2.18305	3.09586	LCK;PIK3R2
Amino Acid Transport (GO:0006865)	1946-02-01	0.242164	0.600848	2.18305	3.09586	SLC25A44;SLC7A3
Intracellular Protein Transmembrane Transport (GO:0065002)	1946-02-01	0.242164	0.600848	2.18305	3.09586	PEX5;TRIM37
Negative Regulation Of Cellular Metabolic Process (GO:0031324)	1946-02-01	0.242164	0.600848	2.18305	3.09586	SREBF1;PAX2
Positive Regulation Of Cell-Cell Adhesion (GO:0022409)	1946-02-01	0.242164	0.600848	2.18305	3.09586	LCK;FSTL3
Regulation Of Angiogenesis (GO:0045765)	6/205	0.243514	0.600848	1.45083	2.04941	RAMP2;SPHK1;AGO2;DAB2IP;CCR3;AMOT
Modulation Of Chemical Synaptic Transmission (GO:0050804)	4/123	0.244283	0.600848	1.6161	2.27778	TRIO;IQSEC2;SLC6A9;TPRG1L
Organonitrogen Compound Biosynthetic Process (GO:1901566)	4/123	0.244283	0.600848	1.6161	2.27778	SPHK1;SPNS2;LCAT;SULT1A2
Positive Regulation Of Protein Phosphorylation (GO:0001934)	10/377	0.244965	0.600848	1.31282	1.84666	DAXX;SH2D3A;SPHK1;IL34;IGF2;DUSP19;TNKS1BP1;PTK2B;CARD14;TGFBR2
Purine Ribonucleotide Metabolic Process (GO:0009150)	1984-03-01	0.246524	0.600848	1.77978	2.49222	HSPA1B;SULT1A2;HSPA1A
Enzyme-Linked Receptor Protein Signaling Pathway (GO:0007167)	4/124	0.248728	0.600848	1.60255	2.22978	TRIO;LCK;TYRO3;MPZL1
Positive Regulation Of Epithelial To Mesenchymal Transition (GO:0010718)	1947-02-01	0.249764	0.600848	2.13443	2.96096	SMAD3;TGFBR2
Negative Regulation Of Cell Differentiation (GO:0045596)	6/207	0.250291	0.600848	1.43624	1.98939	TRIO;SMAD3;IGF2;DAB2IP;PTK2B;LDLRAD4
2-Oxoglutarate Metabolic Process (GO:0006103)	2014-01-01	0.251259	0.600848	3.69118	5.09851	GPT2
Regulation Of Cholesterol Storage (GO:0010885)	2014-01-01	0.251259	0.600848	3.69118	5.09851	MSR1
COPII-coated Vesicle Cargo Loading (GO:0090110)	2014-01-01	0.251259	0.600848	3.69118	5.09851	SEC24D
Regulation Of Leukocyte Activation (GO:0002694)	2014-01-01	0.251259	0.600848	3.69118	5.09851	LCK
Regulation Of Macrophage Differentiation (GO:0045649)	2014-01-01	0.251259	0.600848	3.69118	5.09851	IL34
Aminoglycan Catabolic Process (GO:0006026)	2014-01-01	0.251259	0.600848	3.69118	5.09851	GUSB
Regulation Of Microglial Cell Activation (GO:1903978)	2014-01-01	0.251259	0.600848	3.69118	5.09851	SPHK1
Aorta Development (GO:0035904)	2014-01-01	0.251259	0.600848	3.69118	5.09851	TGFBR2
Regulation Of Neuron Projection Arborization (GO:0150011)	2014-01-01	0.251259	0.600848	3.69118	5.09851	MACF1
Regulation Of Sensory Perception Of Pain (GO:0051930)	2014-01-01	0.251259	0.600848	3.69118	5.09851	ZFHX2
Respiratory Electron Transport Chain (GO:0022904)	2014-01-01	0.251259	0.600848	3.69118	5.09851	MTCO2P12
Response To Muscle Stretch (GO:0035994)	2014-01-01	0.251259	0.600848	3.69118	5.09851	CAV3
Embryonic Cranial Skeleton Morphogenesis (GO:0048701)	2014-01-01	0.251259	0.600848	3.69118	5.09851	TGFBR2
Serine Family Amino Acid Metabolic Process (GO:0009069)	2014-01-01	0.251259	0.600848	3.69118	5.09851	CBS
Endoderm Development (GO:0007492)	2014-01-01	0.251259	0.600848	3.69118	5.09851	DUSP4
Smooth Muscle Contraction (GO:0006939)	2014-01-01	0.251259	0.600848	3.69118	5.09851	MYLK
Establishment Of Spindle Localization (GO:0051293)	2014-01-01	0.251259	0.600848	3.69118	5.09851	ESPL1
Ethanol Metabolic Process (GO:0006067)	2014-01-01	0.251259	0.600848	3.69118	5.09851	SULT1A2
Histone H2A Monoubiquitination (GO:0035518)	2014-01-01	0.251259	0.600848	3.69118	5.09851	TRIM37
Inner Dynein Arm Assembly (GO:0036159)	2014-01-01	0.251259	0.600848	3.69118	5.09851	CCDC40
Membrane Raft Organization (GO:0031579)	2014-01-01	0.251259	0.600848	3.69118	5.09851	CAV3
miRNA-mediated Gene Silencing By Inhibition Of Translation (GO:0035278)	2014-01-01	0.251259	0.600848	3.69118	5.09851	AGO2
Mitochondrial Calcium Ion Transmembrane Transport (GO:0006851)	2014-01-01	0.251259	0.600848	3.69118	5.09851	SLC8B1
Negative Regulation Of Defense Response To Virus (GO:0050687)	2014-01-01	0.251259	0.600848	3.69118	5.09851	MICB
Pancreas Development (GO:0031016)	2014-01-01	0.251259	0.600848	3.69118	5.09851	CCDC40
Pathway-Restricted SMAD Protein Phosphorylation (GO:0060389)	2014-01-01	0.251259	0.600848	3.69118	5.09851	TGFBR2
Positive Regulation Of Exosomal Secretion (GO:1903543)	2014-01-01	0.251259	0.600848	3.69118	5.09851	VPS4A
Positive Regulation Of Glycogen Metabolic Process (GO:0070875)	2014-01-01	0.251259	0.600848	3.69118	5.09851	IGF2
Positive Regulation Of Heterotypic Cell-Cell Adhesion (GO:0034116)	2014-01-01	0.251259	0.600848	3.69118	5.09851	LCK
Positive Regulation Of Histone Acetylation (GO:0035066)	2014-01-01	0.251259	0.600848	3.69118	5.09851	BAZ1B
Protein Localization To Vacuole (GO:0072665)	2014-01-01	0.251259	0.600848	3.69118	5.09851	SZT2
Regulation Of Branching Involved In Ureteric Bud Morphogenesis (GO:0090189)	2014-01-01	0.251259	0.600848	3.69118	5.09851	PAX2
Regulation Of Carbohydrate Catabolic Process (GO:0043470)	2014-01-01	0.251259	0.600848	3.69118	5.09851	PPP1R3B
Negative Regulation Of Gene Expression (GO:0010629)	9/336	0.251513	0.600848	1.3255	1.82954	MSR1;DAXX;SMAD3;BTN2A2;AGO2;FLOT2;TRIM37;HSPA1B;HSPA1A
Cellular Respiration (GO:0045333)	1985-03-01	0.252011	0.600848	1.75799	2.42301	COX4I1;MTCO2P12;COX6A1
Epidermis Development (GO:0008544)	1985-03-01	0.252011	0.600848	1.75799	2.42301	COL7A1;FLOT2;OVOL1
Transport Across Blood-Brain Barrier (GO:0150104)	1985-03-01	0.252011	0.600848	1.75799	2.42301	SLC6A9;LRP2;SLC7A3
mRNA Metabolic Process (GO:0016071)	1985-03-01	0.252011	0.600848	1.75799	2.42301	PRPF8;HSPA1B;HSPA1A
Regulation Of Intrinsic Apoptotic Signaling Pathway (GO:2001242)	1948-02-01	0.257371	0.611118	2.08792	2.8338	LCK;HERPUD1
Negative Regulation Of ERK1 And ERK2 Cascade (GO:0070373)	1948-02-01	0.257371	0.611118	2.08792	2.8338	DUSP4;DAB2IP
Cellular Response To Starvation (GO:0009267)	4/126	0.257668	0.611118	1.57612	2.13735	SREBF1;SZT2;NPRL2;CLEC16A
Positive Regulation Of Intracellular Protein Transport (GO:0090316)	4/126	0.257668	0.611118	1.57612	2.13735	TCAF1;SMAD3;MTCL1;PIK3R2
Glucose Homeostasis (GO:0042593)	1987-03-01	0.263036	0.613781	1.71596	2.2916	CAV3;PIK3R2;SLC8B1
Brain Development (GO:0007420)	5/169	0.264761	0.613781	1.46606	1.94828	ZFHX2;TBR1;PAX2;SHROOM4;TGFBR2
3'-Phosphoadenosine 5'-Phosphosulfate Metabolic Process (GO:0050427)	2015-01-01	0.266582	0.613781	3.42735	4.53121	SULT1A2
Regulation Of Cholesterol Biosynthetic Process (GO:0045540)	2015-01-01	0.266582	0.613781	3.42735	4.53121	SREBF1
Activation Of NF-kappaB-inducing Kinase Activity (GO:0007250)	2015-01-01	0.266582	0.613781	3.42735	4.53121	CARD14
Regulation Of Monocyte Differentiation (GO:0045655)	2015-01-01	0.266582	0.613781	3.42735	4.53121	IL34
Branched-Chain Amino Acid Metabolic Process (GO:0009081)	2015-01-01	0.266582	0.613781	3.42735	4.53121	SLC25A44
Endoplasmic Reticulum To Cytosol Transport (GO:1903513)	2015-01-01	0.266582	0.613781	3.42735	4.53121	HERPUD1
Endosome To Lysosome Transport Via Multivesicular Body Sorting Pathway (GO:0032510)	2015-01-01	0.266582	0.613781	3.42735	4.53121	VPS4A
Epiboly Involved In Wound Healing (GO:0090505)	2015-01-01	0.266582	0.613781	3.42735	4.53121	CD151
Sphingolipid Catabolic Process (GO:0030149)	2015-01-01	0.266582	0.613781	3.42735	4.53121	SPHK1
Glycosaminoglycan Catabolic Process (GO:0006027)	2015-01-01	0.266582	0.613781	3.42735	4.53121	GUSB
High-Density Lipoprotein Particle Remodeling (GO:0034375)	2015-01-01	0.266582	0.613781	3.42735	4.53121	LCAT
Intracellular Sterol Transport (GO:0032366)	2015-01-01	0.266582	0.613781	3.42735	4.53121	VPS4A
Midbody Abscission (GO:0061952)	2015-01-01	0.266582	0.613781	3.42735	4.53121	VPS4A
Mitotic Chromosome Condensation (GO:0007076)	2015-01-01	0.266582	0.613781	3.42735	4.53121	SMC4
Negative Regulation Of Gluconeogenesis (GO:0045721)	2015-01-01	0.266582	0.613781	3.42735	4.53121	PGPEP1
Negative Regulation Of Macrophage Activation (GO:0043031)	2015-01-01	0.266582	0.613781	3.42735	4.53121	LRFN5
Nucleotide-Sugar Biosynthetic Process (GO:0009226)	2015-01-01	0.266582	0.613781	3.42735	4.53121	GFPT2
Peptidyl-Lysine Trimethylation (GO:0018023)	2015-01-01	0.266582	0.613781	3.42735	4.53121	VCPKMT
Positive Regulation Of Mitotic Sister Chromatid Separation (GO:1901970)	2015-01-01	0.266582	0.613781	3.42735	4.53121	ESPL1
Positive Regulation Of Transcription By RNA Polymerase III (GO:0045945)	2015-01-01	0.266582	0.613781	3.42735	4.53121	BAZ1B
Regulation Of Activin Receptor Signaling Pathway (GO:0032925)	2015-01-01	0.266582	0.613781	3.42735	4.53121	FSTL3
Negative Regulation Of Protein Kinase Activity (GO:0006469)	1988-03-01	0.268571	0.617577	1.69568	2.22921	CAV3;DUSP19;DAB2IP
Regulation Of Epithelial Cell Migration (GO:0010632)	1950-02-01	0.272591	0.622869	2.00072	2.6005	MACF1;DAB2IP
Regulation Of Mitochondrion Organization (GO:0010821)	1950-02-01	0.272591	0.622869	2.00072	2.6005	SREBF1;SFI1
Mitotic Metaphase Plate Congression (GO:0007080)	1950-02-01	0.272591	0.622869	2.00072	2.6005	VPS4A;KIF2C
Plasma Membrane Bounded Cell Projection Morphogenesis (GO:0120039)	1950-02-01	0.272591	0.622869	2.00072	2.6005	TRIO;DAB2IP
Positive Regulation Of Transport (GO:0051050)	1950-02-01	0.272591	0.622869	2.00072	2.6005	CD151;TFR2
ERAD Pathway (GO:0036503)	1989-03-01	0.274119	0.624	1.67588	2.16891	RHBDD2;DERL3;HERPUD1
Cellular Response To Peptide Hormone Stimulus (GO:0071375)	1989-03-01	0.274119	0.624	1.67588	2.16891	TBC1D4;PIK3R2;LPIN3
Organic Anion Transport (GO:0015711)	1989-03-01	0.274119	0.624	1.67588	2.16891	CYB5R2;LRRC8E;MFSD10
Regulation Of Synapse Assembly (GO:0051963)	1951-02-01	0.280198	0.624533	1.95979	2.49335	LRFN5;SLITRK2
Receptor Internalization (GO:0031623)	1951-02-01	0.280198	0.624533	1.95979	2.49335	RAMP2;CAV3
DNA Repair-Dependent Chromatin Remodeling (GO:0140861)	2016-01-01	0.281591	0.624533	3.19869	4.0537	PHF1
DNA-templated Transcription Termination (GO:0006353)	2016-01-01	0.281591	0.624533	3.19869	4.0537	MTERF2
Activin Receptor Signaling Pathway (GO:0032924)	2016-01-01	0.281591	0.624533	3.19869	4.0537	SMAD3
Regulation Of Natural Killer Cell Activation (GO:0032814)	2016-01-01	0.281591	0.624533	3.19869	4.0537	ZNF683
Regulation Of Protein Kinase A Signaling (GO:0010738)	2016-01-01	0.281591	0.624533	3.19869	4.0537	MC1R
Regulation Of Steroid Biosynthetic Process (GO:0050810)	2016-01-01	0.281591	0.624533	3.19869	4.0537	FSHB
Cellular Response To Nitrogen Compound (GO:1901699)	2016-01-01	0.281591	0.624533	3.19869	4.0537	DAXX
Regulation Of Triglyceride Biosynthetic Process (GO:0010866)	2016-01-01	0.281591	0.624533	3.19869	4.0537	SREBF1
Reverse Cholesterol Transport (GO:0043691)	2016-01-01	0.281591	0.624533	3.19869	4.0537	LCAT
Sulfation (GO:0051923)	2016-01-01	0.281591	0.624533	3.19869	4.0537	SULT1A2
Synaptic Transmission, Cholinergic (GO:0007271)	2016-01-01	0.281591	0.624533	3.19869	4.0537	RAPSN
Heart Process (GO:0003015)	2016-01-01	0.281591	0.624533	3.19869	4.0537	RANGRF
Intracellular Cholesterol Transport (GO:0032367)	2016-01-01	0.281591	0.624533	3.19869	4.0537	VPS4A
Late Endosome To Lysosome Transport (GO:1902774)	2016-01-01	0.281591	0.624533	3.19869	4.0537	VPS4A
Negative Regulation Of ATP-dependent Activity (GO:0032780)	2016-01-01	0.281591	0.624533	3.19869	4.0537	VCPKMT
Negative Regulation Of Amyloid-Beta Formation (GO:1902430)	2016-01-01	0.281591	0.624533	3.19869	4.0537	BIN1
Negative Regulation Of Viral-Induced Cytoplasmic Pattern Recognition Receptor Signaling Pathway (GO:0039532)	2016-01-01	0.281591	0.624533	3.19869	4.0537	TKFC
Nuclear Migration (GO:0007097)	2016-01-01	0.281591	0.624533	3.19869	4.0537	SYNE3
Protein O-linked Mannosylation (GO:0035269)	2016-01-01	0.281591	0.624533	3.19869	4.0537	LARGE2
Positive Regulation Of MAP Kinase Activity (GO:0043406)	1991-03-01	0.28525	0.62673	1.63762	2.05422	IL34;DUSP19;DAB2IP
Regulation Of Peptide Hormone Secretion (GO:0090276)	1952-02-01	0.287799	0.62673	1.92049	2.39196	TFR2;SLC8B1
Sprouting Angiogenesis (GO:0002040)	1952-02-01	0.287799	0.62673	1.92049	2.39196	RAMP2;PTK2B
Extracellular Matrix Organization (GO:0030198)	5/176	0.292243	0.62673	1.40554	1.72905	COL16A1;COL7A1;COL4A6;COL4A5;COL10A1
Blood Vessel Morphogenesis (GO:0048514)	1953-02-01	0.295391	0.62673	1.88274	2.29592	RAMP2;TGFBR2
Carboxylic Acid Transport (GO:0046942)	1953-02-01	0.295391	0.62673	1.88274	2.29592	SLC16A4;SLC7A3
Endosome Organization (GO:0007032)	1953-02-01	0.295391	0.62673	1.88274	2.29592	FHIP1B;PHETA1
DNA Biosynthetic Process (GO:0071897)	2017-01-01	0.296294	0.62673	2.99862	3.64753	WRNIP1
Regulation Of Establishment Of Cell Polarity (GO:2000114)	2017-01-01	0.296294	0.62673	2.99862	3.64753	PTK2B
Androgen Receptor Signaling Pathway (GO:0030521)	2017-01-01	0.296294	0.62673	2.99862	3.64753	DAXX
cGMP-mediated Signaling (GO:0019934)	2017-01-01	0.296294	0.62673	2.99862	3.64753	GUCY1B2
Cellular Response To Alkaloid (GO:0071312)	2017-01-01	0.296294	0.62673	2.99862	3.64753	TGM2
Regulation Of Tubulin Deacetylation (GO:0090043)	2017-01-01	0.296294	0.62673	2.99862	3.64753	MBIP
Detection Of Visible Light (GO:0009584)	2017-01-01	0.296294	0.62673	2.99862	3.64753	CACNA2D4
Retrograde Protein Transport, ER To Cytosol (GO:0030970)	2017-01-01	0.296294	0.62673	2.99862	3.64753	HERPUD1
Diol Biosynthetic Process (GO:0034312)	2017-01-01	0.296294	0.62673	2.99862	3.64753	SPHK1
Embryo Development Ending In Birth Or Egg Hatching (GO:0009792)	2017-01-01	0.296294	0.62673	2.99862	3.64753	RAI2
Epoxygenase P450 Pathway (GO:0019373)	2017-01-01	0.296294	0.62673	2.99862	3.64753	CYP2E1
Sulfur Amino Acid Metabolic Process (GO:0000096)	2017-01-01	0.296294	0.62673	2.99862	3.64753	CBS
Transcription By RNA Polymerase I (GO:0006360)	2017-01-01	0.296294	0.62673	2.99862	3.64753	POLR2F
Triglyceride Biosynthetic Process (GO:0019432)	2017-01-01	0.296294	0.62673	2.99862	3.64753	LPIN3
Ventricular Cardiac Muscle Cell Action Potential (GO:0086005)	2017-01-01	0.296294	0.62673	2.99862	3.64753	CAV3
Intracellular Zinc Ion Homeostasis (GO:0006882)	2017-01-01	0.296294	0.62673	2.99862	3.64753	LCK
Microtubule Depolymerization (GO:0007019)	2017-01-01	0.296294	0.62673	2.99862	3.64753	KIF2C
Muscle Tissue Morphogenesis (GO:0060415)	2017-01-01	0.296294	0.62673	2.99862	3.64753	MYLK
Negative Regulation Of Calcium Ion Transport (GO:0051926)	2017-01-01	0.296294	0.62673	2.99862	3.64753	CAV3
Negative Regulation Of Fibroblast Proliferation (GO:0048147)	2017-01-01	0.296294	0.62673	2.99862	3.64753	DAB2IP
Negative Regulation Of Leukocyte Activation (GO:0002695)	2017-01-01	0.296294	0.62673	2.99862	3.64753	LRFN5
Nicotinamide Nucleotide Metabolic Process (GO:0046496)	2017-01-01	0.296294	0.62673	2.99862	3.64753	G6PD
Nuclear Envelope Organization (GO:0006998)	2017-01-01	0.296294	0.62673	2.99862	3.64753	VPS4A
Positive Regulation Of Leukocyte Proliferation (GO:0070665)	2017-01-01	0.296294	0.62673	2.99862	3.64753	IL34
Positive Regulation Of Lymphocyte Chemotaxis (GO:0140131)	2017-01-01	0.296294	0.62673	2.99862	3.64753	PTK2B
Positive Regulation Of Macrophage Derived Foam Cell Differentiation (GO:0010744)	2017-01-01	0.296294	0.62673	2.99862	3.64753	MSR1
Positive Regulation Of Peptidyl-Lysine Acetylation (GO:2000758)	2017-01-01	0.296294	0.62673	2.99862	3.64753	BAZ1B
Positive Regulation Of Small GTPase Mediated Signal Transduction (GO:0051057)	2017-01-01	0.296294	0.62673	2.99862	3.64753	TGM2
Regulation Of DNA-templated DNA Replication (GO:0090329)	2017-01-01	0.296294	0.62673	2.99862	3.64753	WRNIP1
Regulation Of Adenylate Cyclase Activity (GO:0045761)	2017-01-01	0.296294	0.62673	2.99862	3.64753	LTB4R2
Regulation Of Brown Fat Cell Differentiation (GO:0090335)	2017-01-01	0.296294	0.62673	2.99862	3.64753	FNDC5
Positive Regulation Of Cellular Component Biogenesis (GO:0044089)	1993-03-01	0.296417	0.62673	1.60107	1.94688	SMAD3;VPS4A;DAB2IP
Positive Regulation Of Protein Kinase B Signaling (GO:0051897)	1993-03-01	0.296417	0.62673	1.60107	1.94688	MC1R;IGF2;LRP2
Cellular Response To Hormone Stimulus (GO:0032870)	1994-03-01	0.302011	0.633278	1.58339	1.89578	RAMP2;HSPA1B;HSPA1A
ERBB Signaling Pathway (GO:0038127)	1954-02-01	0.302971	0.633278	1.84644	2.20487	SHC1;PTK2B
Negative Regulation Of TOR Signaling (GO:0032007)	1954-02-01	0.302971	0.633278	1.84644	2.20487	SZT2;NPRL2
Negative Regulation Of Protein Modification By Small Protein Conjugation Or Removal (GO:1903321)	1954-02-01	0.302971	0.633278	1.84644	2.20487	HSPA1B;HSPA1A
Negative Regulation Of Protein Ubiquitination (GO:0031397)	1954-02-01	0.302971	0.633278	1.84644	2.20487	HSPA1B;HSPA1A
Nucleosome Assembly (GO:0006334)	1954-02-01	0.302971	0.633278	1.84644	2.20487	BRD2;DAXX
Peptidyl-Tyrosine Modification (GO:0018212)	1954-02-01	0.302971	0.633278	1.84644	2.20487	LCK;PTK2B
Regulation Of Synaptic Transmission, Glutamatergic (GO:0051966)	1955-02-01	0.310536	0.633278	1.81151	2.11848	TPRG1L;PTK2B
Regulation Of Establishment Or Maintenance Of Cell Polarity (GO:0032878)	2018-01-01	0.310697	0.633278	2.82209	3.29884	PTK2B
Regulation Of Exosomal Secretion (GO:1903541)	2018-01-01	0.310697	0.633278	2.82209	3.29884	VPS4A
Regulation Of Histone Modification (GO:0031056)	2018-01-01	0.310697	0.633278	2.82209	3.29884	MBIP
Regulation Of Lymphocyte Activation (GO:0051249)	2018-01-01	0.310697	0.633278	2.82209	3.29884	LCK
Regulation Of Mitochondrial Outer Membrane Permeabilization Involved In Apoptotic Signaling Pathway (GO:1901028)	2018-01-01	0.310697	0.633278	2.82209	3.29884	HSPA1A
Branching Involved In Ureteric Bud Morphogenesis (GO:0001658)	2018-01-01	0.310697	0.633278	2.82209	3.29884	PAX2
Regulation Of Protein Deacetylation (GO:0090311)	2018-01-01	0.310697	0.633278	2.82209	3.29884	MBIP
Regulation Of Vascular Endothelial Cell Proliferation (GO:1905562)	2018-01-01	0.310697	0.633278	2.82209	3.29884	IGF2
Regulation Of Ventricular Cardiac Muscle Cell Membrane Repolarization (GO:0060307)	2018-01-01	0.310697	0.633278	2.82209	3.29884	CAV3
Response To Cholesterol (GO:0070723)	2018-01-01	0.310697	0.633278	2.82209	3.29884	TGFBR2
Energy Reserve Metabolic Process (GO:0006112)	2018-01-01	0.310697	0.633278	2.82209	3.29884	GFPT2
Ureteric Bud Morphogenesis (GO:0060675)	2018-01-01	0.310697	0.633278	2.82209	3.29884	PAX2
Vesicle Transport Along Actin Filament (GO:0030050)	2018-01-01	0.310697	0.633278	2.82209	3.29884	MYO15A
Melanosome Assembly (GO:1903232)	2018-01-01	0.310697	0.633278	2.82209	3.29884	AP1M1
Mitotic Cytokinetic Process (GO:1902410)	2018-01-01	0.310697	0.633278	2.82209	3.29884	VPS4A
Myoblast Fusion (GO:0007520)	2018-01-01	0.310697	0.633278	2.82209	3.29884	ERVFRD-1
Negative Regulation Of ERBB Signaling Pathway (GO:1901185)	2018-01-01	0.310697	0.633278	2.82209	3.29884	DAB2IP
Negative Regulation Of Nervous System Development (GO:0051961)	2018-01-01	0.310697	0.633278	2.82209	3.29884	ELAPOR2
Positive Regulation Of Chromosome Segregation (GO:0051984)	2018-01-01	0.310697	0.633278	2.82209	3.29884	SMC4
Positive Regulation Of Establishment Of Protein Localization (GO:1904951)	2018-01-01	0.310697	0.633278	2.82209	3.29884	WRAP53
Positive Regulation Of Extracellular Matrix Organization (GO:1903055)	2018-01-01	0.310697	0.633278	2.82209	3.29884	SMAD3
Positive Regulation Of Focal Adhesion Assembly (GO:0051894)	2018-01-01	0.310697	0.633278	2.82209	3.29884	COL16A1
Positive Regulation Of Macrophage Migration (GO:1905523)	2018-01-01	0.310697	0.633278	2.82209	3.29884	IL34
Positive Regulation Of Triglyceride Metabolic Process (GO:0090208)	2018-01-01	0.310697	0.633278	2.82209	3.29884	SREBF1
Regulation Of Macroautophagy (GO:0016241)	1996-03-01	0.313212	0.636471	1.54918	1.79841	CLEC16A;VPS26B;TECPR1
Cellular Response To Transforming Growth Factor Beta Stimulus (GO:0071560)	1996-03-01	0.313212	0.636471	1.54918	1.79841	SMAD3;FSHB;TGFBR2
Positive Regulation Of Protein Modification Process (GO:0031401)	6/225	0.313318	0.636471	1.31697	1.52839	ANKLE2;DAXX;IL34;IGF2;AMBRA1;CARD14
Intracellular Calcium Ion Homeostasis (GO:0006874)	4/139	0.317028	0.639033	1.42339	1.63515	CAV3;SLC8B1;CHERP;HERPUD1
Phosphatidylinositol Biosynthetic Process (GO:0006661)	1998-03-01	0.324423	0.639033	1.51641	1.70704	PIK3R2;PI4KB;PIGG
Regulation Of Cellular Response To Growth Factor Stimulus (GO:0090287)	2019-01-01	0.324806	0.639033	2.66517	2.99705	FSTL3
COPII Vesicle Coating (GO:0048208)	2019-01-01	0.324806	0.639033	2.66517	2.99705	TRAPPC6A
NADP Metabolic Process (GO:0006739)	2019-01-01	0.324806	0.639033	2.66517	2.99705	G6PD
Regulation Of Granulocyte Chemotaxis (GO:0071622)	2019-01-01	0.324806	0.639033	2.66517	2.99705	IL34
Regulation Of Lymphocyte Differentiation (GO:0045619)	2019-01-01	0.324806	0.639033	2.66517	2.99705	ZNF683
Regulation Of Neuroinflammatory Response (GO:0150077)	2019-01-01	0.324806	0.639033	2.66517	2.99705	SPHK1
Atrioventricular Valve Morphogenesis (GO:0003181)	2019-01-01	0.324806	0.639033	2.66517	2.99705	TGFBR2
Bicarbonate Transport (GO:0015701)	2019-01-01	0.324806	0.639033	2.66517	2.99705	CYB5R2
Regulation Of Vascular Endothelial Growth Factor Signaling Pathway (GO:1900746)	2019-01-01	0.324806	0.639033	2.66517	2.99705	DAB2IP
Chondroitin Sulfate Proteoglycan Biosynthetic Process (GO:0050650)	2019-01-01	0.324806	0.639033	2.66517	2.99705	XYLT2
Skeletal Muscle Contraction (GO:0003009)	2019-01-01	0.324806	0.639033	2.66517	2.99705	TNNI1
snRNA Processing (GO:0016180)	2019-01-01	0.324806	0.639033	2.66517	2.99705	SAGE2P
Sphingosine Metabolic Process (GO:0006670)	2019-01-01	0.324806	0.639033	2.66517	2.99705	SPHK1
Vesicle Docking (GO:0048278)	2019-01-01	0.324806	0.639033	2.66517	2.99705	STX10
Vesicle Targeting, Rough ER To cis-Golgi (GO:0048207)	2019-01-01	0.324806	0.639033	2.66517	2.99705	TRAPPC6A
Linoleic Acid Metabolic Process (GO:0043651)	2019-01-01	0.324806	0.639033	2.66517	2.99705	RAPSN
Negative Regulation Of Calcium Ion Transmembrane Transport (GO:1903170)	2019-01-01	0.324806	0.639033	2.66517	2.99705	BIN1
Phosphatidylcholine Biosynthetic Process (GO:0006656)	2019-01-01	0.324806	0.639033	2.66517	2.99705	LCAT
Pore Complex Assembly (GO:0046931)	2019-01-01	0.324806	0.639033	2.66517	2.99705	GSDMD
Positive Regulation Of Activated T Cell Proliferation (GO:0042104)	2019-01-01	0.324806	0.639033	2.66517	2.99705	IGF2
Positive Regulation Of Axon Extension (GO:0045773)	2019-01-01	0.324806	0.639033	2.66517	2.99705	MACF1
Positive Regulation Of calcineurin-NFAT Signaling Cascade (GO:0070886)	2019-01-01	0.324806	0.639033	2.66517	2.99705	CHERP
Positive Regulation Of Calcineurin-Mediated Signaling (GO:0106058)	2019-01-01	0.324806	0.639033	2.66517	2.99705	CHERP
Positive Regulation Of Hormone Secretion (GO:0046887)	2019-01-01	0.324806	0.639033	2.66517	2.99705	TFR2
Protein Heterooligomerization (GO:0051291)	2019-01-01	0.324806	0.639033	2.66517	2.99705	ZNF746
Purine Ribonucleotide Transport (GO:0015868)	2019-01-01	0.324806	0.639033	2.66517	2.99705	LRRC8E
Regulation Of Autophagy Of Mitochondrion (GO:1903146)	2019-01-01	0.324806	0.639033	2.66517	2.99705	SREBF1
Membrane Lipid Biosynthetic Process (GO:0046467)	1957-02-01	0.325613	0.639231	1.74545	1.95848	SPHK1;SPNS2
Monoatomic Anion Transport (GO:0006820)	1957-02-01	0.325613	0.639231	1.74545	1.95848	SLC34A1;LRRC8E
Axon Development (GO:0061564)	1999-03-01	0.330029	0.642217	1.50054	1.66346	SLITRK2;BAIAP2;PAX2
Regulation Of Phagocytosis (GO:0050764)	1958-02-01	0.333119	0.642217	1.7142	1.88434	SPHK1;TGM2
Selective Autophagy (GO:0061912)	1958-02-01	0.333119	0.642217	1.7142	1.88434	PEX5;AMBRA1
Positive Regulation Of Type II Interferon Production (GO:0032729)	1958-02-01	0.333119	0.642217	1.7142	1.88434	PDE4B;CD276
Negative Regulation Of Intracellular Signal Transduction (GO:1902532)	6/231	0.334915	0.642217	1.28146	1.40175	DUSP4;CAV3;NPRL2;DAB2IP;PIK3R2;HERPUD1
Regulation Of Organelle Organization (GO:0033043)	3/100	0.335634	0.642217	1.48499	1.62122	CLEC16A;SFI1;TECPR1
Protein Complex Oligomerization (GO:0051259)	3/100	0.335634	0.642217	1.48499	1.62122	GSDMD;PEG10;ZNF746
Regulation Of Fibroblast Migration (GO:0010762)	2020-01-01	0.338627	0.642217	2.52477	2.73396	ARHGEF7
Actin Filament-Based Transport (GO:0099515)	2020-01-01	0.338627	0.642217	2.52477	2.73396	MYO15A
Adenine Nucleotide Transport (GO:0051503)	2020-01-01	0.338627	0.642217	2.52477	2.73396	LRRC8E
Ameboidal-Type Cell Migration (GO:0001667)	2020-01-01	0.338627	0.642217	2.52477	2.73396	AMOT
Regulation Of Protein Localization To Cell Periphery (GO:1904375)	2020-01-01	0.338627	0.642217	2.52477	2.73396	VPS4A
Regulation Of Smooth Muscle Contraction (GO:0006940)	2020-01-01	0.338627	0.642217	2.52477	2.73396	SPHK1
Cellular Response To Copper Ion (GO:0071280)	2020-01-01	0.338627	0.642217	2.52477	2.73396	DAXX
Regulation Of Toll-Like Receptor Signaling Pathway (GO:0034121)	2020-01-01	0.338627	0.642217	2.52477	2.73396	TYRO3
Epithelial Cilium Movement Involved In Extracellular Fluid Movement (GO:0003351)	2020-01-01	0.338627	0.642217	2.52477	2.73396	CCDC40
Xenobiotic Transport (GO:0042908)	2020-01-01	0.338627	0.642217	2.52477	2.73396	ABCA8
Late Endosome To Vacuole Transport (GO:0045324)	2020-01-01	0.338627	0.642217	2.52477	2.73396	VPS4A
Long-Term Memory (GO:0007616)	2020-01-01	0.338627	0.642217	2.52477	2.73396	LRRC66
Long-Term Synaptic Potentiation (GO:0060291)	2020-01-01	0.338627	0.642217	2.52477	2.73396	PTK2B
Mitochondrial RNA Metabolic Process (GO:0000959)	2020-01-01	0.338627	0.642217	2.52477	2.73396	MTERF2
Monocarboxylic Acid Catabolic Process (GO:0072329)	2020-01-01	0.338627	0.642217	2.52477	2.73396	LPIN3
Negative Regulation Of Cytokine Production Involved In Inflammatory Response (GO:1900016)	2020-01-01	0.338627	0.642217	2.52477	2.73396	EXTL3
Negative Regulation Of Protein Localization To Cell Periphery (GO:1904376)	2020-01-01	0.338627	0.642217	2.52477	2.73396	LZTFL1
Nuclear-Transcribed mRNA poly(A) Tail Shortening (GO:0000289)	2020-01-01	0.338627	0.642217	2.52477	2.73396	TNKS1BP1
Positive Regulation Of Antigen Receptor-Mediated Signaling Pathway (GO:0050857)	2020-01-01	0.338627	0.642217	2.52477	2.73396	LCK
Positive Regulation Of Embryonic Development (GO:0040019)	2020-01-01	0.338627	0.642217	2.52477	2.73396	TENM4
Positive Regulation Of Lipid Storage (GO:0010884)	2020-01-01	0.338627	0.642217	2.52477	2.73396	MSR1
Positive Regulation Of Phospholipase Activity (GO:0010518)	2020-01-01	0.338627	0.642217	2.52477	2.73396	ARL1
Receptor Metabolic Process (GO:0043112)	2020-01-01	0.338627	0.642217	2.52477	2.73396	PHETA1
Axonogenesis (GO:0007409)	5/188	0.340346	0.642217	1.31256	1.41466	NOTCH3;TRIO;SLITRK2;BAIAP2;PAX2
Regulation Of miRNA Transcription (GO:1902893)	1959-02-01	0.340602	0.642217	1.68404	1.81378	SREBF1;SMAD3
Anterior/Posterior Pattern Specification (GO:0009952)	1959-02-01	0.340602	0.642217	1.68404	1.81378	BHLHE40;HOXC4
Chordate Embryonic Development (GO:0043009)	1959-02-01	0.340602	0.642217	1.68404	1.81378	IGF2;ZNF568
Glucose Metabolic Process (GO:0006006)	1959-02-01	0.340602	0.642217	1.68404	1.81378	G6PD;H6PD
Negative Regulation Of Protein-Containing Complex Assembly (GO:0031333)	1959-02-01	0.340602	0.642217	1.68404	1.81378	PEX5;LDLRAD4
protein-DNA Complex Assembly (GO:0065004)	1959-02-01	0.340602	0.642217	1.68404	1.81378	BRD2;DAXX
Regulation Of Cell Death (GO:0010941)	1959-02-01	0.340602	0.642217	1.68404	1.81378	VPS4A;HSPA1B
Positive Regulation Of Developmental Process (GO:0051094)	6/233	0.342156	0.644476	1.27003	1.3621	AGO2;NEURL1;DAB2IP;ARHGEF7;ELAPOR2;PAX2
Regulation Of Dendritic Spine Development (GO:0060998)	2021-01-01	0.352166	0.653147	2.39841	2.50311	NEURL1
Regulation Of Histone Deacetylation (GO:0031063)	2021-01-01	0.352166	0.653147	2.39841	2.50311	MBIP
Aminoglycan Biosynthetic Process (GO:0006023)	2021-01-01	0.352166	0.653147	2.39841	2.50311	XYLT2
Antigen Processing And Presentation Of Endogenous Peptide Antigen (GO:0002483)	2021-01-01	0.352166	0.653147	2.39841	2.50311	MICB
Chaperone-Mediated Protein Complex Assembly (GO:0051131)	2021-01-01	0.352166	0.653147	2.39841	2.50311	HSPA1A
Endocardial Cushion Morphogenesis (GO:0003203)	2021-01-01	0.352166	0.653147	2.39841	2.50311	TGFBR2
Focal Adhesion Assembly (GO:0048041)	2021-01-01	0.352166	0.653147	2.39841	2.50311	ARHGEF7
Maturation Of 5.8S rRNA From Tricistronic rRNA Transcript (SSU-rRNA, 5.8S rRNA, LSU-rRNA) (GO:0000466)	2021-01-01	0.352166	0.653147	2.39841	2.50311	LTB4R2
Negative Regulation Of GTPase Activity (GO:0034260)	2021-01-01	0.352166	0.653147	2.39841	2.50311	DAB2IP
Negative Regulation Of Biomineral Tissue Development (GO:0070168)	2021-01-01	0.352166	0.653147	2.39841	2.50311	PTK2B
Negative Regulation Of Osteoclast Differentiation (GO:0045671)	2021-01-01	0.352166	0.653147	2.39841	2.50311	FSTL3
Negative Regulation Of Reactive Oxygen Species Metabolic Process (GO:2000378)	2021-01-01	0.352166	0.653147	2.39841	2.50311	PAX2
Plasma Membrane Repair (GO:0001778)	2021-01-01	0.352166	0.653147	2.39841	2.50311	VPS4A
Positive Regulation Of Dendritic Spine Development (GO:0060999)	2021-01-01	0.352166	0.653147	2.39841	2.50311	NEURL1
Protein Mannosylation (GO:0035268)	2021-01-01	0.352166	0.653147	2.39841	2.50311	LARGE2
Regulation Of Pathway-Restricted SMAD Protein Phosphorylation (GO:0060393)	1961-02-01	0.355486	0.656615	1.62679	1.68254	LDLRAD4;TGFBR2
Negative Regulation Of Intrinsic Apoptotic Signaling Pathway (GO:2001243)	1961-02-01	0.355486	0.656615	1.62679	1.68254	HERPUD1;HSPA1A
Positive Regulation Of Cell Junction Assembly (GO:1901890)	1961-02-01	0.355486	0.656615	1.62679	1.68254	COL16A1;SLITRK2
Positive Regulation Of Interleukin-8 Production (GO:0032757)	1961-02-01	0.355486	0.656615	1.62679	1.68254	HSPA1B;HSPA1A
Positive Regulation Of Apoptotic Signaling Pathway (GO:2001235)	1962-02-01	0.362883	0.659517	1.59959	1.62147	LCK;DAB2IP
Negative Regulation Of DNA-binding Transcription Factor Activity (GO:0043433)	4/149	0.36343	0.659517	1.32455	1.34066	BHLHE40;DAB2IP;KEAP1;TRIM37
Negative Regulation Of Protein Phosphorylation (GO:0001933)	4/149	0.36343	0.659517	1.32455	1.34066	CAV3;DUSP19;DAB2IP;LDLRAD4
Regulation Of Histone Acetylation (GO:0035065)	2022-01-01	0.365428	0.659517	2.28408	2.29935	BAZ1B
Acylglycerol Biosynthetic Process (GO:0046463)	2022-01-01	0.365428	0.659517	2.28408	2.29935	LPIN3
Regulation Of Mononuclear Cell Migration (GO:0071675)	2022-01-01	0.365428	0.659517	2.28408	2.29935	IL34
Cellular Response To Cadmium Ion (GO:0071276)	2022-01-01	0.365428	0.659517	2.28408	2.29935	DAXX
Regulation Of Vascular Endothelial Growth Factor Receptor Signaling Pathway (GO:0030947)	2022-01-01	0.365428	0.659517	2.28408	2.29935	DAB2IP
Dendritic Cell Differentiation (GO:0097028)	2022-01-01	0.365428	0.659517	2.28408	2.29935	TGFBR2
Ribosomal Large Subunit Assembly (GO:0000027)	2022-01-01	0.365428	0.659517	2.28408	2.29935	DHX30
snRNA 3'-End Processing (GO:0034472)	2022-01-01	0.365428	0.659517	2.28408	2.29935	SAGE2P
Modulation By Host Of Viral Process (GO:0044788)	2022-01-01	0.365428	0.659517	2.28408	2.29935	FASN
Negative Regulation Of Cell Development (GO:0010721)	2022-01-01	0.365428	0.659517	2.28408	2.29935	CAV3
Negative Regulation Of Macroautophagy (GO:0016242)	2022-01-01	0.365428	0.659517	2.28408	2.29935	CLEC16A
Negative Regulation Of Myeloid Cell Differentiation (GO:0045638)	2022-01-01	0.365428	0.659517	2.28408	2.29935	PTK2B
Oxoacid Metabolic Process (GO:0043436)	2022-01-01	0.365428	0.659517	2.28408	2.29935	SULT1A2
Placenta Development (GO:0001890)	2022-01-01	0.365428	0.659517	2.28408	2.29935	IGF2
Platelet Dense Granule Organization (GO:0060155)	2022-01-01	0.365428	0.659517	2.28408	2.29935	AP1M1
Positive Regulation Of Excitatory Postsynaptic Potential (GO:2000463)	2022-01-01	0.365428	0.659517	2.28408	2.29935	PTK2B
Positive Regulation Of Protein Autophosphorylation (GO:0031954)	2022-01-01	0.365428	0.659517	2.28408	2.29935	TNKS1BP1
Positive Regulation Of Synaptic Transmission, Glutamatergic (GO:0051968)	2022-01-01	0.365428	0.659517	2.28408	2.29935	PTK2B
Regulation Of Cardiac Muscle Cell Membrane Repolarization (GO:0099623)	2022-01-01	0.365428	0.659517	2.28408	2.29935	CAV3
Regulation Of Catabolic Process (GO:0009894)	2022-01-01	0.365428	0.659517	2.28408	2.29935	PTK2B
Regulation Of Inflammatory Response (GO:0050727)	6/240	0.367603	0.662783	1.2316	1.23252	GSDMD;LRFN5;AKNA;SPHK1;TYRO3;EXTL3
Oxidative Phosphorylation (GO:0006119)	1963-02-01	0.370248	0.663148	1.57329	1.56319	ATP5PO;MTCO2P12
Regulation Of Cellular Catabolic Process (GO:0031329)	1963-02-01	0.370248	0.663148	1.57329	1.56319	KEAP1;PIK3R2
Regulation Of Autophagy (GO:0010506)	6/241	0.371248	0.663148	1.22629	1.21512	SREBF1;NPRL2;KEAP1;PIK3R2;VPS26B;AMBRA1
Positive Regulation Of T Cell Activation (GO:0050870)	3/107	0.374743	0.663148	1.38454	1.35895	LCK;FLOT2;CD276
Response To Metal Ion (GO:0010038)	1964-02-01	0.377579	0.663148	1.54783	1.50755	TFR2;SLC34A1
Protein N-linked Glycosylation (GO:0006487)	1964-02-01	0.377579	0.663148	1.54783	1.50755	DERL3;GFPT2
Negative Regulation Of Programmed Cell Death (GO:0043069)	9/381	0.377745	0.663148	1.16244	1.13168	ANKLE2;SHC1;SPHK1;PTK2B;LRP2;CARD14;PAX2;HSPA1B;HSPA1A
Regulation Of Cellular Response To Transforming Growth Factor Beta Stimulus (GO:1903844)	2023-01-01	0.378419	0.663148	2.18015	2.11856	SMAD3
Regulation Of Cholesterol Transport (GO:0032374)	2023-01-01	0.378419	0.663148	2.18015	2.11856	ABCA8
U2-type Prespliceosome Assembly (GO:1903241)	2023-01-01	0.378419	0.663148	2.18015	2.11856	PHF5A
Artery Development (GO:0060840)	2023-01-01	0.378419	0.663148	2.18015	2.11856	TGFBR2
Bile Acid And Bile Salt Transport (GO:0015721)	2023-01-01	0.378419	0.663148	2.18015	2.11856	SLC27A5
Cellular Lipid Catabolic Process (GO:0044242)	2023-01-01	0.378419	0.663148	2.18015	2.11856	LPIN3
Regulation Of Toll-Like Receptor 4 Signaling Pathway (GO:0034143)	2023-01-01	0.378419	0.663148	2.18015	2.11856	DAB2IP
Cholesterol Efflux (GO:0033344)	2023-01-01	0.378419	0.663148	2.18015	2.11856	ABCA8
Entrainment Of Circadian Clock By Photoperiod (GO:0043153)	2023-01-01	0.378419	0.663148	2.18015	2.11856	BHLHE40
Hepaticobiliary System Development (GO:0061008)	2023-01-01	0.378419	0.663148	2.18015	2.11856	PHF1
Immune Response-Activating Cell Surface Receptor Signaling Pathway (GO:0002429)	2023-01-01	0.378419	0.663148	2.18015	2.11856	MICB
Microtubule Nucleation (GO:0007020)	2023-01-01	0.378419	0.663148	2.18015	2.11856	TUBGCP3
Negative Regulation Of Actin Filament Polymerization (GO:0030837)	2023-01-01	0.378419	0.663148	2.18015	2.11856	PFN4
Negative Regulation Of Epidermal Growth Factor Receptor Signaling Pathway (GO:0042059)	2023-01-01	0.378419	0.663148	2.18015	2.11856	DAB2IP
Nuclear Membrane Reassembly (GO:0031468)	2023-01-01	0.378419	0.663148	2.18015	2.11856	VPS4A
Positive Regulation Of Cell-Substrate Junction Organization (GO:0150117)	2023-01-01	0.378419	0.663148	2.18015	2.11856	COL16A1
Positive Regulation Of Morphogenesis Of An Epithelium (GO:1905332)	2023-01-01	0.378419	0.663148	2.18015	2.11856	PAX2
Positive Regulation Of Oxidoreductase Activity (GO:0051353)	2023-01-01	0.378419	0.663148	2.18015	2.11856	PPM1H
Protein N-linked Glycosylation Via Asparagine (GO:0018279)	2023-01-01	0.378419	0.663148	2.18015	2.11856	DERL3
Protein Alkylation (GO:0008213)	2023-01-01	0.378419	0.663148	2.18015	2.11856	VCPKMT
Regulation Of T Cell Migration (GO:2000404)	2023-01-01	0.378419	0.663148	2.18015	2.11856	SPNS2
Regulation Of Cardiac Muscle Hypertrophy (GO:0010611)	2023-01-01	0.378419	0.663148	2.18015	2.11856	CAV3
Glycerophospholipid Biosynthetic Process (GO:0046474)	3/108	0.3803	0.6658	1.37129	1.32576	LCAT;PI4KB;SFI1
Fatty Acid Biosynthetic Process (GO:0006633)	1965-02-01	0.384875	0.669268	1.52319	1.45439	FASN;CYP2E1
Monocarboxylic Acid Biosynthetic Process (GO:0072330)	1965-02-01	0.384875	0.669268	1.52319	1.45439	FASN;SLC27A5
Positive Regulation Of T Cell Proliferation (GO:0042102)	1965-02-01	0.384875	0.669268	1.52319	1.45439	IGF2;CD276
Positive Regulation Of Programmed Cell Death (GO:0043068)	6/245	0.385836	0.669268	1.20552	1.14807	BIN1;NEURL1;DAB2IP;PNMA2;ARHGEF7;TGM2
Cell-Matrix Adhesion (GO:0007160)	3/109	0.385845	0.669268	1.35828	1.29352	ITGB6;ARHGEF7;FBLN5
Positive Regulation Of Intracellular Signal Transduction (GO:1902533)	12/525	0.388485	0.669268	1.1241	1.06284	MAP4K1;MC1R;SHC1;LCK;SPHK1;DAB2IP;DUSP19;IGF2;MIB2;LRP2;EXTL3;TGM2
Fc-gamma Receptor Signaling Pathway (GO:0038094)	2024-01-01	0.391145	0.669268	2.08525	1.95738	LCK
RNA Splicing, Via Transesterification Reactions (GO:0000375)	2024-01-01	0.391145	0.669268	2.08525	1.95738	PRPF8
Regulation Of Muscle Cell Differentiation (GO:0051147)	2024-01-01	0.391145	0.669268	2.08525	1.95738	IGF2
Regulation Of Proteolysis Involved In Protein Catabolic Process (GO:1903050)	2024-01-01	0.391145	0.669268	2.08525	1.95738	PTK2B
Regulation Of Viral Life Cycle (GO:1903900)	2024-01-01	0.391145	0.669268	2.08525	1.95738	TYRO3
Response To Copper Ion (GO:0046688)	2024-01-01	0.391145	0.669268	2.08525	1.95738	DAXX
Secondary Alcohol Biosynthetic Process (GO:1902653)	2024-01-01	0.391145	0.669268	2.08525	1.95738	G6PD
Ear Morphogenesis (GO:0042471)	2024-01-01	0.391145	0.669268	2.08525	1.95738	PAX2
Early Endosome To Late Endosome Transport (GO:0045022)	2024-01-01	0.391145	0.669268	2.08525	1.95738	FHIP1B
Fat-Soluble Vitamin Metabolic Process (GO:0006775)	2024-01-01	0.391145	0.669268	2.08525	1.95738	LRP2
Gliogenesis (GO:0042063)	2024-01-01	0.391145	0.669268	2.08525	1.95738	PAX2
Iron Ion Transport (GO:0006826)	2024-01-01	0.391145	0.669268	2.08525	1.95738	TFR2
Multivesicular Body Sorting Pathway (GO:0071985)	2024-01-01	0.391145	0.669268	2.08525	1.95738	VPS4A
Negative Regulation Of Ossification (GO:0030279)	2024-01-01	0.391145	0.669268	2.08525	1.95738	PTK2B
Neuromuscular Junction Development (GO:0007528)	2024-01-01	0.391145	0.669268	2.08525	1.95738	PPFIBP2
Photoperiodism (GO:0009648)	2024-01-01	0.391145	0.669268	2.08525	1.95738	BHLHE40
Positive Regulation Of BMP Signaling Pathway (GO:0030513)	2024-01-01	0.391145	0.669268	2.08525	1.95738	ELAPOR2
Positive Regulation Of Interleukin-17 Production (GO:0032740)	2024-01-01	0.391145	0.669268	2.08525	1.95738	SPHK1
Response To Reactive Oxygen Species (GO:0000302)	1966-02-01	0.392133	0.669694	1.49931	1.40358	PEX5;MPV17
Negative Regulation Of Endopeptidase Activity (GO:0010951)	1966-02-01	0.392133	0.669694	1.49931	1.40358	BIN1;SERPINA6
Regulation Of Cell Migration (GO:0030334)	10/434	0.395772	0.669728	1.13296	1.05016	MACF1;TCAF1;CD151;SPHK1;FSHB;PTK2B;LDLRAD4;SRGAP1;MYLK;AMOT
RNA Metabolic Process (GO:0016070)	3/111	0.3969	0.669728	1.33299	1.23178	AGO2;HNRNPH3;SIDT2
Cytoskeleton Organization (GO:0007010)	3/111	0.3969	0.669728	1.33299	1.23178	BIN1;MICAL3;SYNE3
Negative Regulation Of Inflammatory Response (GO:0050728)	3/111	0.3969	0.669728	1.33299	1.23178	LRFN5;TYRO3;EXTL3
Activation Of Cysteine-Type Endopeptidase Activity Involved In Apoptotic Process (GO:0006919)	1967-02-01	0.399352	0.669728	1.47617	1.35499	SMAD3;LCK
Cholesterol Metabolic Process (GO:0008203)	1967-02-01	0.399352	0.669728	1.47617	1.35499	G6PD;LCAT
Peptidyl-Tyrosine Phosphorylation (GO:0018108)	1967-02-01	0.399352	0.669728	1.47617	1.35499	LCK;PTK2B
Calcium Ion Transport (GO:0006816)	3/112	0.402408	0.669728	1.32069	1.20221	RAMP2;TRPV3;CACNA2D4
Negative Regulation Of Defense Response (GO:0031348)	3/112	0.402408	0.669728	1.32069	1.20221	LRFN5;TYRO3;EXTL3
ATP Biosynthetic Process (GO:0006754)	2025-01-01	0.403611	0.669728	1.99826	1.81303	ATP5PO
Regulation Of Double-Strand Break Repair Via Nonhomologous End Joining (GO:2001032)	2025-01-01	0.403611	0.669728	1.99826	1.81303	WRAP53
Regulation Of Hippo Signaling (GO:0035330)	2025-01-01	0.403611	0.669728	1.99826	1.81303	NEK8
Bile Acid Biosynthetic Process (GO:0006699)	2025-01-01	0.403611	0.669728	1.99826	1.81303	SLC27A5
Regulation Of Synapse Organization (GO:0050807)	2025-01-01	0.403611	0.669728	1.99826	1.81303	SLITRK2
Cellular Response To Hexose Stimulus (GO:0071331)	2025-01-01	0.403611	0.669728	1.99826	1.81303	PAX2
Cholesterol Biosynthetic Process (GO:0006695)	2025-01-01	0.403611	0.669728	1.99826	1.81303	G6PD
Secretory Granule Organization (GO:0033363)	2025-01-01	0.403611	0.669728	1.99826	1.81303	AP1M1
Vesicle Cargo Loading (GO:0035459)	2025-01-01	0.403611	0.669728	1.99826	1.81303	SEC24D
Vesicle-Mediated Transport Between Endosomal Compartments (GO:0098927)	2025-01-01	0.403611	0.669728	1.99826	1.81303	FHIP1B
Wound Healing, Spreading Of Cells (GO:0044319)	2025-01-01	0.403611	0.669728	1.99826	1.81303	CD151
Inner Ear Morphogenesis (GO:0042472)	2025-01-01	0.403611	0.669728	1.99826	1.81303	PAX2
Lamellipodium Assembly (GO:0030032)	2025-01-01	0.403611	0.669728	1.99826	1.81303	ARHGEF7
Long-Chain Fatty Acid Biosynthetic Process (GO:0042759)	2025-01-01	0.403611	0.669728	1.99826	1.81303	CYP2E1
Metanephros Development (GO:0001656)	2025-01-01	0.403611	0.669728	1.99826	1.81303	PAX2
Mitotic Cell Cycle Checkpoint Signaling (GO:0007093)	2025-01-01	0.403611	0.669728	1.99826	1.81303	VPS4A
Myotube Differentiation (GO:0014902)	2025-01-01	0.403611	0.669728	1.99826	1.81303	ERVFRD-1
Negative Regulation Of Protein Localization To Membrane (GO:1905476)	2025-01-01	0.403611	0.669728	1.99826	1.81303	LZTFL1
Negative Regulation Of Response To Wounding (GO:1903035)	2025-01-01	0.403611	0.669728	1.99826	1.81303	EXTL3
Negative Regulation Of Signaling Receptor Activity (GO:2000272)	2025-01-01	0.403611	0.669728	1.99826	1.81303	SLC6A9
Phosphatidylethanolamine Metabolic Process (GO:0046337)	2025-01-01	0.403611	0.669728	1.99826	1.81303	SFI1
Positive Regulation Of Interleukin-2 Production (GO:0032743)	2025-01-01	0.403611	0.669728	1.99826	1.81303	PDE4B
Neuropeptide Signaling Pathway (GO:0007218)	1968-02-01	0.406531	0.673957	1.45373	1.30849	LTB4R2;NXPH3
Response To Endoplasmic Reticulum Stress (GO:0034976)	3/114	0.41338	0.676365	1.29676	1.14555	DAB2IP;PIK3R2;HERPUD1
Phospholipid Metabolic Process (GO:0006644)	1969-02-01	0.413669	0.676365	1.43196	1.26397	LCAT;PGPEP1
Fc Receptor Signaling Pathway (GO:0038093)	2026-01-01	0.415823	0.676365	1.91824	1.68325	LCK
Regulation Of Epidermal Growth Factor-Activated Receptor Activity (GO:0007176)	2026-01-01	0.415823	0.676365	1.91824	1.68325	SHC1
L-amino Acid Transport (GO:0015807)	2026-01-01	0.415823	0.676365	1.91824	1.68325	SLC6A9
Wnt Signaling Pathway, Planar Cell Polarity Pathway (GO:0060071)	2026-01-01	0.415823	0.676365	1.91824	1.68325	CELSR3
Regulation Of Myeloid Cell Differentiation (GO:0045637)	2026-01-01	0.415823	0.676365	1.91824	1.68325	PTK2B
Regulation Of Potassium Ion Transmembrane Transporter Activity (GO:1901016)	2026-01-01	0.415823	0.676365	1.91824	1.68325	CAV3
Camera-Type Eye Development (GO:0043010)	2026-01-01	0.415823	0.676365	1.91824	1.68325	PAX2
Cellular Response To Xenobiotic Stimulus (GO:0071466)	2026-01-01	0.415823	0.676365	1.91824	1.68325	PDE4B
Establishment Or Maintenance Of Apical/Basal Cell Polarity (GO:0035088)	2026-01-01	0.415823	0.676365	1.91824	1.68325	MTCL1
miRNA-mediated Gene Silencing (GO:0035195)	2026-01-01	0.415823	0.676365	1.91824	1.68325	AGO2
Negative Regulation Of Endothelial Cell Apoptotic Process (GO:2000352)	2026-01-01	0.415823	0.676365	1.91824	1.68325	RAMP2
Negative Regulation Of Lipid Metabolic Process (GO:0045833)	2026-01-01	0.415823	0.676365	1.91824	1.68325	SREBF1
Nuclear Membrane Organization (GO:0071763)	2026-01-01	0.415823	0.676365	1.91824	1.68325	VPS4A
Organelle Membrane Fusion (GO:0090174)	2026-01-01	0.415823	0.676365	1.91824	1.68325	STX10
Plasma Membrane Invagination (GO:0099024)	2026-01-01	0.415823	0.676365	1.91824	1.68325	MSR1
Positive Regulation Of Microtubule Polymerization Or Depolymerization (GO:0031112)	2026-01-01	0.415823	0.676365	1.91824	1.68325	CAV3
Positive Regulation Of Nuclear Division (GO:0051785)	2026-01-01	0.415823	0.676365	1.91824	1.68325	IGF2
Protein Localization To Cell Surface (GO:0034394)	2026-01-01	0.415823	0.676365	1.91824	1.68325	FBLN5
Protein Targeting To Lysosome (GO:0006622)	2026-01-01	0.415823	0.676365	1.91824	1.68325	VPS4A
Negative Regulation Of Extrinsic Apoptotic Signaling Pathway (GO:2001237)	1970-02-01	0.420764	0.682179	1.41083	1.22133	HSPA1B;HSPA1A
Protein Autophosphorylation (GO:0046777)	4/162	0.423483	0.682179	1.21475	1.04377	MAP4K1;LCK;TYRO3;PTK2B
DNA Synthesis Involved In DNA Repair (GO:0000731)	2027-01-01	0.427784	0.682179	1.84436	1.56611	WRNIP1
GPI Anchor Metabolic Process (GO:0006505)	2027-01-01	0.427784	0.682179	1.84436	1.56611	PIGG
Cellular Response To Acid Chemical (GO:0071229)	2027-01-01	0.427784	0.682179	1.84436	1.56611	NEURL1
Regulation Of Transcription Regulatory Region DNA Binding (GO:2000677)	2027-01-01	0.427784	0.682179	1.84436	1.56611	RNF220
Respiratory Tube Development (GO:0030323)	2027-01-01	0.427784	0.682179	1.84436	1.56611	CCDC40
Ventricular Septum Morphogenesis (GO:0060412)	2027-01-01	0.427784	0.682179	1.84436	1.56611	TGFBR2
Microtubule Polymerization Or Depolymerization (GO:0031109)	2027-01-01	0.427784	0.682179	1.84436	1.56611	KIF2C
Negative Regulation Of Notch Signaling Pathway (GO:0045746)	2027-01-01	0.427784	0.682179	1.84436	1.56611	NEURL1
Peptide Cross-Linking (GO:0018149)	2027-01-01	0.427784	0.682179	1.84436	1.56611	TGM2
Peptidyl-Lysine Methylation (GO:0018022)	2027-01-01	0.427784	0.682179	1.84436	1.56611	VCPKMT
Positive Regulation Of TORC1 Signaling (GO:1904263)	2027-01-01	0.427784	0.682179	1.84436	1.56611	CLEC16A
Positive Regulation Of Filopodium Assembly (GO:0051491)	2027-01-01	0.427784	0.682179	1.84436	1.56611	NEURL1
Positive Regulation Of Mitotic Cell Cycle (GO:0045931)	2027-01-01	0.427784	0.682179	1.84436	1.56611	SPHK1
Positive Regulation Of Nitric Oxide Biosynthetic Process (GO:0045429)	2027-01-01	0.427784	0.682179	1.84436	1.56611	SMAD3
Positive Regulation Of Response To Wounding (GO:1903036)	2027-01-01	0.427784	0.682179	1.84436	1.56611	MYLK
Regulation Of Actin Polymerization Or Depolymerization (GO:0008064)	2027-01-01	0.427784	0.682179	1.84436	1.56611	COTL1
Lipid Biosynthetic Process (GO:0008610)	1971-02-01	0.427814	0.682179	1.39031	1.18046	SREBF1;FASN
Positive Regulation Of Cell-Substrate Adhesion (GO:0010811)	1971-02-01	0.427814	0.682179	1.39031	1.18046	PTK2B;ARHGEF7
Protein Autoubiquitination (GO:0051865)	1971-02-01	0.427814	0.682179	1.39031	1.18046	TRIM37;RNF220
Negative Regulation Of Cell Migration (GO:0030336)	4/163	0.428056	0.682179	1.20705	1.02418	TCAF1;DAB2IP;LDLRAD4;SRGAP1
Nitrogen Compound Transport (GO:0071705)	4/163	0.428056	0.682179	1.20705	1.02418	RAMP2;LRP2;SCAMP3;SLC7A3
Regulation Of Cellular Localization (GO:0060341)	1972-02-01	0.434819	0.687125	1.37038	1.14128	VPS4A;STX10
Cholesterol Homeostasis (GO:0042632)	1972-02-01	0.434819	0.687125	1.37038	1.14128	CAV3;LCAT
Positive Regulation Of Protein Localization To Nucleus (GO:1900182)	1972-02-01	0.434819	0.687125	1.37038	1.14128	SMAD3;PIK3R2
Regulation Of Small GTPase Mediated Signal Transduction (GO:0051056)	3/118	0.435125	0.687125	1.2514	1.04132	TRIO;ARHGAP19;TGM2
Golgi To Plasma Membrane Protein Transport (GO:0043001)	2028-01-01	0.439502	0.687125	1.77596	1.46004	MACF1
Regulation Of Nitric-Oxide Synthase Activity (GO:0050999)	2028-01-01	0.439502	0.687125	1.77596	1.46004	CAV3
Regulation Of Plasma Membrane Bounded Cell Projection Organization (GO:0120035)	2028-01-01	0.439502	0.687125	1.77596	1.46004	TBR1
Regulation Of Protein Localization To Membrane (GO:1905475)	2028-01-01	0.439502	0.687125	1.77596	1.46004	VPS4A
Cell-Substrate Junction Assembly (GO:0007044)	2028-01-01	0.439502	0.687125	1.77596	1.46004	ARHGEF7
Determination Of Bilateral Symmetry (GO:0009855)	2028-01-01	0.439502	0.687125	1.77596	1.46004	DNAH5
Diterpenoid Metabolic Process (GO:0016101)	2028-01-01	0.439502	0.687125	1.77596	1.46004	LRP2
Sterol Biosynthetic Process (GO:0016126)	2028-01-01	0.439502	0.687125	1.77596	1.46004	G6PD
Fatty Acid Derivative Biosynthetic Process (GO:1901570)	2028-01-01	0.439502	0.687125	1.77596	1.46004	SLC27A5
Transcription By RNA Polymerase III (GO:0006383)	2028-01-01	0.439502	0.687125	1.77596	1.46004	POLR2F
Vesicle Coating (GO:0006901)	2028-01-01	0.439502	0.687125	1.77596	1.46004	TRAPPC6A
Negative Regulation Of G2/M Transition Of Mitotic Cell Cycle (GO:0010972)	2028-01-01	0.439502	0.687125	1.77596	1.46004	VPS4A
Negative Regulation Of Cytoskeleton Organization (GO:0051494)	2028-01-01	0.439502	0.687125	1.77596	1.46004	CAV3
Positive Regulation Of Fibroblast Proliferation (GO:0048146)	2028-01-01	0.439502	0.687125	1.77596	1.46004	SPHK1
Positive Regulation Of Nitric Oxide Metabolic Process (GO:1904407)	2028-01-01	0.439502	0.687125	1.77596	1.46004	SMAD3
Protein Localization To Golgi Apparatus (GO:0034067)	2028-01-01	0.439502	0.687125	1.77596	1.46004	ARL1
Pyroptosis (GO:0070269)	2028-01-01	0.439502	0.687125	1.77596	1.46004	GSDMD
Regulation Of Calcium Ion-Dependent Exocytosis (GO:0017158)	2028-01-01	0.439502	0.687125	1.77596	1.46004	RPH3A
Regulation Of Protein-Containing Complex Assembly (GO:0043254)	3/119	0.440515	0.687523	1.24055	1.01702	PEX5;DAB2IP;SEPTIN8
Cellular Response To Tumor Necrosis Factor (GO:0071356)	3/119	0.440515	0.687523	1.24055	1.01702	DAB2IP;PTK2B;CARD14
Sterol Homeostasis (GO:0055092)	1973-02-01	0.441778	0.688307	1.35101	1.1037	CAV3;LCAT
Monocarboxylic Acid Transport (GO:0015718)	1973-02-01	0.441778	0.688307	1.35101	1.1037	SLC16A4;SLC27A5
Regulation Of GTPase Activity (GO:0043087)	5/214	0.445381	0.691351	1.14773	0.928315	SGSM2;DAB2IP;RGL4;ARHGEF7;TGM2
Import Into Nucleus (GO:0051170)	1974-02-01	0.448689	0.691351	1.33217	1.06764	RANGRF;SPRN
Negative Regulation Of Neuron Apoptotic Process (GO:0043524)	1974-02-01	0.448689	0.691351	1.33217	1.06764	TYRO3;PTK2B
Positive Regulation Of MAPK Cascade (GO:0043410)	7/310	0.449013	0.691351	1.10845	0.887541	MAP4K1;SHC1;IL34;IGF2;DAB2IP;DUSP19;PTK2B
Regulation Of Establishment Of Planar Polarity (GO:0090175)	2029-01-01	0.45098	0.691351	1.71245	1.36368	CELSR3
RNA-mediated Gene Silencing (GO:0031047)	2029-01-01	0.45098	0.691351	1.71245	1.36368	AGO2
Alpha-Amino Acid Metabolic Process (GO:1901605)	2029-01-01	0.45098	0.691351	1.71245	1.36368	CBS
Regulation Of Muscle Contraction (GO:0006937)	2029-01-01	0.45098	0.691351	1.71245	1.36368	TNNI1
Regulation Of Neuron Migration (GO:2001222)	2029-01-01	0.45098	0.691351	1.71245	1.36368	DAB2IP
Carbohydrate Derivative Biosynthetic Process (GO:1901137)	2029-01-01	0.45098	0.691351	1.71245	1.36368	G6PD
Regulation Of Voltage-Gated Calcium Channel Activity (GO:1901385)	2029-01-01	0.45098	0.691351	1.71245	1.36368	PDE4B
Response To Alcohol (GO:0097305)	2029-01-01	0.45098	0.691351	1.71245	1.36368	TGFBR2
Lipid Droplet Organization (GO:0034389)	2029-01-01	0.45098	0.691351	1.71245	1.36368	SFI1
Modified Amino Acid Transport (GO:0072337)	2029-01-01	0.45098	0.691351	1.71245	1.36368	SLC7A3
Multivesicular Body Assembly (GO:0036258)	2029-01-01	0.45098	0.691351	1.71245	1.36368	VPS4A
Positive Regulation Of Calcium Ion Transport (GO:0051928)	2029-01-01	0.45098	0.691351	1.71245	1.36368	MYLK
Positive Regulation Of Dephosphorylation (GO:0035306)	2029-01-01	0.45098	0.691351	1.71245	1.36368	ANKLE2
Positive Regulation Of Neural Precursor Cell Proliferation (GO:2000179)	2029-01-01	0.45098	0.691351	1.71245	1.36368	LRP2
Protein Acetylation (GO:0006473)	2029-01-01	0.45098	0.691351	1.71245	1.36368	SPHK1
Regulation Of Fat Cell Differentiation (GO:0045598)	1975-02-01	0.455552	0.69659	1.31386	1.03301	TRIO;SMAD3
Negative Regulation Of Phosphorylation (GO:0042326)	1975-02-01	0.455552	0.69659	1.31386	1.03301	NPRL2;DAB2IP
Nucleosome Organization (GO:0034728)	1975-02-01	0.455552	0.69659	1.31386	1.03301	BRD2;DAXX
Positive Regulation Of Transcription By RNA Polymerase II (GO:0045944)	20/938	0.456493	0.696964	1.04581	0.820104	SREBF1;AKNA;SMAD3;FSHB;DAB2IP;IGF2;ZNF76;TCF20;PIK3R2;BAZ1B;ZFX;PAX2;ETS2;FSTL3;MC1R;TFR2;AGO2;ZNF746;HOXC4;LPIN3
Positive Regulation Of Macromolecule Biosynthetic Process (GO:0010557)	3/122	0.456565	0.696964	1.20909	0.947956	SLC6A9;AGO2;IGF2
GPI Anchor Biosynthetic Process (GO:0006506)	1930-01-01	0.462224	0.69759	1.65331	1.27587	PIGG
Regulation Of Macrophage Derived Foam Cell Differentiation (GO:0010743)	1930-01-01	0.462224	0.69759	1.65331	1.27587	MSR1
Regulation Of Potassium Ion Transport (GO:0043266)	1930-01-01	0.462224	0.69759	1.65331	1.27587	PTK2B
Cardiac Muscle Cell Action Potential Involved In Contraction (GO:0086002)	1930-01-01	0.462224	0.69759	1.65331	1.27587	CAV3
Response To Amino Acid (GO:0043200)	1930-01-01	0.462224	0.69759	1.65331	1.27587	NEURL1
Intrinsic Apoptotic Signaling Pathway In Response To Endoplasmic Reticulum Stress (GO:0070059)	1930-01-01	0.462224	0.69759	1.65331	1.27587	DAB2IP
Lamellipodium Organization (GO:0097581)	1930-01-01	0.462224	0.69759	1.65331	1.27587	ARHGEF7
Maturation Of SSU-rRNA From Tricistronic rRNA Transcript (SSU-rRNA, 5.8S rRNA, LSU-rRNA) (GO:0000462)	1930-01-01	0.462224	0.69759	1.65331	1.27587	LTB4R2
Multivesicular Body Organization (GO:0036257)	1930-01-01	0.462224	0.69759	1.65331	1.27587	VPS4A
Negative Regulation Of Carbohydrate Metabolic Process (GO:0045912)	1930-01-01	0.462224	0.69759	1.65331	1.27587	PGPEP1
Negative Regulation Of Myeloid Leukocyte Differentiation (GO:0002762)	1930-01-01	0.462224	0.69759	1.65331	1.27587	FSTL3
Phagocytosis, Engulfment (GO:0006911)	1930-01-01	0.462224	0.69759	1.65331	1.27587	MSR1
Positive Regulation Of Lipid Kinase Activity (GO:0090218)	1930-01-01	0.462224	0.69759	1.65331	1.27587	PTK2B
Regulation Of Ras Protein Signal Transduction (GO:0046578)	1976-02-01	0.462365	0.69759	1.29604	0.999762	DAB2IP;RASAL3
Negative Regulation Of Growth (GO:0045926)	3/124	0.467157	0.704029	1.18898	0.904924	SMAD3;HSPA1B;HSPA1A
Cell-Cell Adhesion Via Plasma-Membrane Adhesion Molecules (GO:0098742)	4/172	0.468732	0.704029	1.14186	0.865213	LRFN5;TENM4;SLITRK2;TGFBR2
Embryonic Organ Development (GO:0048568)	1977-02-01	0.469128	0.704029	1.27869	0.967813	IGF2;TGFBR2
Negative Regulation Of Blood Vessel Morphogenesis (GO:2000181)	1977-02-01	0.469128	0.704029	1.27869	0.967813	DAB2IP;AMOT
Positive Regulation Of Response To Stimulus (GO:0048584)	1977-02-01	0.469128	0.704029	1.27869	0.967813	EXTL3;WRAP53
Positive Regulation Of Synaptic Transmission (GO:0050806)	1977-02-01	0.469128	0.704029	1.27869	0.967813	PTK2B;RAPSN
Negative Regulation Of Cell Growth (GO:0030308)	3/125	0.472418	0.704029	1.17918	0.884254	SMAD3;HSPA1B;HSPA1A
Positive Regulation Of Cell Motility (GO:2000147)	5/221	0.473128	0.704029	1.11014	0.830814	CD151;FSHB;SPHK1;PTK2B;MYLK
Regulation Of Centrosome Duplication (GO:0010824)	1931-01-01	0.473238	0.704029	1.59812	1.19564	SPICE1
Regulation Of Gluconeogenesis (GO:0006111)	1931-01-01	0.473238	0.704029	1.59812	1.19564	PGPEP1
Bile Acid Metabolic Process (GO:0008206)	1931-01-01	0.473238	0.704029	1.59812	1.19564	SLC27A5
Regulation Of Protein Autophosphorylation (GO:0031952)	1931-01-01	0.473238	0.704029	1.59812	1.19564	TNKS1BP1
Regulation Of Response To Biotic Stimulus (GO:0002831)	1931-01-01	0.473238	0.704029	1.59812	1.19564	TKFC
Endodermal Cell Differentiation (GO:0035987)	1931-01-01	0.473238	0.704029	1.59812	1.19564	COL7A1
Modulation Of Excitatory Postsynaptic Potential (GO:0098815)	1931-01-01	0.473238	0.704029	1.59812	1.19564	PTK2B
Positive Regulation Of Lamellipodium Organization (GO:1902745)	1931-01-01	0.473238	0.704029	1.59812	1.19564	ARHGEF7
Regulation Of Cell Morphogenesis (GO:0022604)	1931-01-01	0.473238	0.704029	1.59812	1.19564	MACF1
Regulation Of Apoptotic Process (GO:0042981)	15/705	0.474902	0.705007	1.04287	0.776571	ANKLE2;SHC1;SPHK1;DAB2IP;LRP2;PNMA2;PAX2;BIN1;NEURL1;PTK2B;ARHGEF7;CARD14;HSPA1B;HSPA1A;TGM2
Regulation Of Innate Immune Response (GO:0045088)	1978-02-01	0.475841	0.705007	1.2618	0.937104	TKFC;TYRO3
Cellular Response To Nutrient Levels (GO:0031669)	1978-02-01	0.475841	0.705007	1.2618	0.937104	SREBF1;CLEC16A
Long-Chain Fatty Acid Metabolic Process (GO:0001676)	1978-02-01	0.475841	0.705007	1.2618	0.937104	CYP2E1;RAPSN
Negative Regulation Of Protein Modification Process (GO:0031400)	1978-02-01	0.475841	0.705007	1.2618	0.937104	G6PD;DAB2IP
Positive Regulation Of Apoptotic Process (GO:0043065)	6/270	0.47627	0.705067	1.08995	0.808492	BIN1;NEURL1;DAB2IP;PNMA2;ARHGEF7;TGM2
Regulation Of Neuron Projection Development (GO:0010975)	4/174	0.477633	0.705597	1.12831	0.83372	SEZ6;DAB2IP;PTK2B;TBR1
Positive Regulation Of Cellular Biosynthetic Process (GO:0031328)	4/174	0.477633	0.705597	1.12831	0.83372	SREBF1;SMAD3;AGO2;IGF2
Regulation Of Neuron Differentiation (GO:0045664)	1979-02-01	0.482501	0.705597	1.24535	0.907575	ZFHX2;BIN1
Vesicle Fusion (GO:0006906)	1979-02-01	0.482501	0.705597	1.24535	0.907575	VPS4A;STX10
Positive Regulation Of Catabolic Process (GO:0009896)	1979-02-01	0.482501	0.705597	1.24535	0.907575	CAV3;DAB2IP
Positive Regulation Of Endocytosis (GO:0045807)	1979-02-01	0.482501	0.705597	1.24535	0.907575	CD151;TFR2
Protein Import Into Nucleus (GO:0006606)	1979-02-01	0.482501	0.705597	1.24535	0.907575	RANGRF;SPRN
NIK/NF-kappaB Signaling (GO:0038061)	1932-01-01	0.484027	0.705597	1.54649	1.12216	CARD14
Regulation Of Transcription By RNA Polymerase I (GO:0006356)	1932-01-01	0.484027	0.705597	1.54649	1.12216	BAZ1B
Chromosome Condensation (GO:0030261)	1932-01-01	0.484027	0.705597	1.54649	1.12216	SMC4
Respiratory System Development (GO:0060541)	1932-01-01	0.484027	0.705597	1.54649	1.12216	CCDC40
Female Gamete Generation (GO:0007292)	1932-01-01	0.484027	0.705597	1.54649	1.12216	FSHB
Transition Metal Ion Transport (GO:0000041)	1932-01-01	0.484027	0.705597	1.54649	1.12216	TFR2
Very Long-Chain Fatty Acid Metabolic Process (GO:0000038)	1932-01-01	0.484027	0.705597	1.54649	1.12216	SLC27A5
Vesicle Budding From Membrane (GO:0006900)	1932-01-01	0.484027	0.705597	1.54649	1.12216	VPS4A
Left/Right Pattern Formation (GO:0060972)	1932-01-01	0.484027	0.705597	1.54649	1.12216	DNAH5
Negative Regulation Of Proteasomal Ubiquitin-Dependent Protein Catabolic Process (GO:0032435)	1932-01-01	0.484027	0.705597	1.54649	1.12216	FHIT
Positive Regulation Of Synapse Assembly (GO:0051965)	1932-01-01	0.484027	0.705597	1.54649	1.12216	SLITRK2
Regulation Of Calcium Ion Transmembrane Transporter Activity (GO:1901019)	1932-01-01	0.484027	0.705597	1.54649	1.12216	CAV3
Positive Regulation Of Hydrolase Activity (GO:0051345)	4/176	0.486477	0.707757	1.11507	0.803483	SGSM2;RGL4;ARHGEF7;TGM2
Regulation Of Organelle Assembly (GO:1902115)	1980-02-01	0.489109	0.707757	1.22932	0.879172	TBC1D9B;SPICE1
Regulation Of Protein Localization To Plasma Membrane (GO:1903076)	1980-02-01	0.489109	0.707757	1.22932	0.879172	VPS4A;RANGRF
Negative Regulation Of Protein Serine/Threonine Kinase Activity (GO:0071901)	1980-02-01	0.489109	0.707757	1.22932	0.879172	CAV3;DAB2IP
Protein Homooligomerization (GO:0051260)	3/129	0.493222	0.707757	1.14151	0.806814	GSDMD;PEG10;ZNF746
Actin Filament Bundle Assembly (GO:0051017)	1933-01-01	0.494596	0.707757	1.49809	1.05467	BAIAP2
Actin Filament Bundle Organization (GO:0061572)	1933-01-01	0.494596	0.707757	1.49809	1.05467	BAIAP2
Regulation Of Protein Polymerization (GO:0032271)	1933-01-01	0.494596	0.707757	1.49809	1.05467	COTL1
Signal Transduction By P53 Class Mediator (GO:0072331)	1933-01-01	0.494596	0.707757	1.49809	1.05467	FHIT
Ubiquitin-Dependent Protein Catabolic Process Via The Multivesicular Body Sorting Pathway (GO:0043162)	1933-01-01	0.494596	0.707757	1.49809	1.05467	VPS4A
Ventricular Cardiac Muscle Tissue Morphogenesis (GO:0055010)	1933-01-01	0.494596	0.707757	1.49809	1.05467	LRP2
intra-Golgi Vesicle-Mediated Transport (GO:0006891)	1933-01-01	0.494596	0.707757	1.49809	1.05467	COPB2
Lung Development (GO:0030324)	1933-01-01	0.494596	0.707757	1.49809	1.05467	CCDC40
Negative Regulation Of Epithelial Cell Migration (GO:0010633)	1933-01-01	0.494596	0.707757	1.49809	1.05467	DAB2IP
Negative Regulation Of Small Molecule Metabolic Process (GO:0062014)	1933-01-01	0.494596	0.707757	1.49809	1.05467	PGPEP1
Positive Regulation Of RNA Metabolic Process (GO:0051254)	1933-01-01	0.494596	0.707757	1.49809	1.05467	HSPA1A
Positive Regulation Of T Cell Mediated Cytotoxicity (GO:0001916)	1933-01-01	0.494596	0.707757	1.49809	1.05467	MICB
Positive Regulation Of Chromosome Organization (GO:2001252)	1933-01-01	0.494596	0.707757	1.49809	1.05467	SMC4
Positive Regulation Of Ion Transmembrane Transporter Activity (GO:0032414)	1933-01-01	0.494596	0.707757	1.49809	1.05467	TCAF1
Positive Regulation Of Reproductive Process (GO:2000243)	1933-01-01	0.494596	0.707757	1.49809	1.05467	AGO2
Positive Regulation Of Telomerase Activity (GO:0051973)	1933-01-01	0.494596	0.707757	1.49809	1.05467	WRAP53
Regulation Of G0 To G1 Transition (GO:0070316)	1933-01-01	0.494596	0.707757	1.49809	1.05467	DAB2IP
Regulation Of Amyloid-Beta Formation (GO:1902003)	1933-01-01	0.494596	0.707757	1.49809	1.05467	BIN1
Regulation Of Interleukin-8 Production (GO:0032677)	1981-02-01	0.495664	0.707757	1.2137	0.851841	HSPA1B;HSPA1A
Spindle Assembly (GO:0051225)	1981-02-01	0.495664	0.707757	1.2137	0.851841	SPICE1;TUBGCP3
Negative Regulation Of NF-kappaB Transcription Factor Activity (GO:0032088)	1981-02-01	0.495664	0.707757	1.2137	0.851841	DAB2IP;TRIM37
Intracellular Protein Transport (GO:0006886)	7/325	0.49821	0.708727	1.05534	0.735294	COPB2;ARL1;RANGRF;VPS26B;SNX8;STX10;SPRN
Transmembrane Receptor Protein Serine/Threonine Kinase Signaling Pathway (GO:0007178)	3/130	0.498359	0.708727	1.13246	0.788685	SMAD3;FSHB;TGFBR2
Positive Regulation Of Peptidyl-Tyrosine Phosphorylation (GO:0050731)	3/130	0.498359	0.708727	1.13246	0.788685	IL34;IGF2;PTK2B
Apoptotic Process (GO:0006915)	5/228	0.500419	0.708727	1.0749	0.744164	IFI27L1;ESPL1;PTK2B;RELT;TGFBR2
Negative Regulation Of Apoptotic Signaling Pathway (GO:2001234)	1982-02-01	0.502166	0.708727	1.19846	0.825532	HERPUD1;HSPA1A
Synapse Organization (GO:0050808)	3/131	0.50347	0.708727	1.12356	0.771019	LRFN5;PPFIBP2;SLITRK2
Regulation Of Interleukin-17 Production (GO:0032660)	1934-01-01	0.504948	0.708727	1.45261	0.992571	SPHK1
Cellular Response To Glucose Stimulus (GO:0071333)	1934-01-01	0.504948	0.708727	1.45261	0.992571	PAX2
Cellular Response To Hydrogen Peroxide (GO:0070301)	1934-01-01	0.504948	0.708727	1.45261	0.992571	PAX2
Embryonic Skeletal System Development (GO:0048706)	1934-01-01	0.504948	0.708727	1.45261	0.992571	HOXC4
Establishment Of Mitotic Spindle Localization (GO:0040001)	1934-01-01	0.504948	0.708727	1.45261	0.992571	ESPL1
Glial Cell Differentiation (GO:0010001)	1934-01-01	0.504948	0.708727	1.45261	0.992571	PAX2
Transcription Initiation-Coupled Chromatin Remodeling (GO:0045815)	1934-01-01	0.504948	0.708727	1.45261	0.992571	PHF1
Microtubule Polymerization (GO:0046785)	1934-01-01	0.504948	0.708727	1.45261	0.992571	TUBGCP3
Negative Regulation Of JNK Cascade (GO:0046329)	1934-01-01	0.504948	0.708727	1.45261	0.992571	DUSP19
Organophosphate Biosynthetic Process (GO:0090407)	1934-01-01	0.504948	0.708727	1.45261	0.992571	G6PD
Positive Regulation Of Neuron Death (GO:1901216)	1934-01-01	0.504948	0.708727	1.45261	0.992571	DAXX
Positive Regulation Of Transcription By RNA Polymerase I (GO:0045943)	1934-01-01	0.504948	0.708727	1.45261	0.992571	BAZ1B
Protein Targeting To Vacuole (GO:0006623)	1934-01-01	0.504948	0.708727	1.45261	0.992571	VPS4A
Regulation Of T Cell Receptor Signaling Pathway (GO:0050856)	1934-01-01	0.504948	0.708727	1.45261	0.992571	LCK
Regulation Of Blood Circulation (GO:1903522)	1934-01-01	0.504948	0.708727	1.45261	0.992571	CAV3
Regulation Of calcineurin-NFAT Signaling Cascade (GO:0070884)	1934-01-01	0.504948	0.708727	1.45261	0.992571	CHERP
Protein-Containing Complex Assembly (GO:0065003)	7/328	0.507894	0.712309	1.04532	0.708186	GSDMD;TRAPPC6A;COL16A1;SMAD3;PTK2B;HSPA1A;CCDC40
Epithelial Cell Differentiation (GO:0030855)	3/132	0.508555	0.712685	1.11479	0.753801	HNRNPH3;OVOL1;PAX2
Negative Regulation Of Multicellular Organismal Process (GO:0051241)	5/231	0.511951	0.713019	1.06047	0.710012	BTN2A2;DAB2IP;TRPV3;LDLRAD4;ELAPOR2
Positive Regulation Of Phosphorylation (GO:0042327)	5/231	0.511951	0.713019	1.06047	0.710012	DAXX;IL34;TYRO3;IGF2;CARD14
Negative Regulation Of Cell Motility (GO:2000146)	3/133	0.513612	0.713019	1.10616	0.737019	TCAF1;LDLRAD4;SRGAP1
Adherens Junction Organization (GO:0034332)	1935-01-01	0.515089	0.713019	1.40982	0.935295	RAMP2
Regulation Of Regulated Secretory Pathway (GO:1903305)	1935-01-01	0.515089	0.713019	1.40982	0.935295	RPH3A
Cellular Response To Amino Acid Stimulus (GO:0071230)	1935-01-01	0.515089	0.713019	1.40982	0.935295	NEURL1
Regulation Of Sodium Ion Transport (GO:0002028)	1935-01-01	0.515089	0.713019	1.40982	0.935295	RANGRF
Regulatory ncRNA Processing (GO:0070918)	1935-01-01	0.515089	0.713019	1.40982	0.935295	AGO2
Glutamate Receptor Signaling Pathway (GO:0007215)	1935-01-01	0.515089	0.713019	1.40982	0.935295	PTK2B
Intrinsic Apoptotic Signaling Pathway By P53 Class Mediator (GO:0072332)	1935-01-01	0.515089	0.713019	1.40982	0.935295	FHIT
Neutral Amino Acid Transport (GO:0015804)	1935-01-01	0.515089	0.713019	1.40982	0.935295	SLC6A9
One-Carbon Compound Transport (GO:0019755)	1935-01-01	0.515089	0.713019	1.40982	0.935295	CYB5R2
Platelet Aggregation (GO:0070527)	1935-01-01	0.515089	0.713019	1.40982	0.935295	TYRO3
Positive Regulation Of Substrate Adhesion-Dependent Cell Spreading (GO:1900026)	1935-01-01	0.515089	0.713019	1.40982	0.935295	ARHGEF7
Protein Methylation (GO:0006479)	1935-01-01	0.515089	0.713019	1.40982	0.935295	VCPKMT
Regulation Of Axon Extension (GO:0030516)	1935-01-01	0.515089	0.713019	1.40982	0.935295	MACF1
Regulation Of Kinase Activity (GO:0043549)	1985-02-01	0.521342	0.720025	1.15497	0.752287	NPRL2;TYRO3
Establishment Of Protein Localization To Organelle (GO:0072594)	1985-02-01	0.521342	0.720025	1.15497	0.752287	RANGRF;SPRN
Macromolecule Catabolic Process (GO:0009057)	1985-02-01	0.521342	0.720025	1.15497	0.752287	DAB2IP;SIDT2
Regulation Of Trans-Synaptic Signaling (GO:0099177)	1936-01-01	0.525023	0.720713	1.36947	0.882366	IQSEC2
Substrate Adhesion-Dependent Cell Spreading (GO:0034446)	1936-01-01	0.525023	0.720713	1.36947	0.882366	TYRO3
Histone H3 Acetylation (GO:0043966)	1936-01-01	0.525023	0.720713	1.36947	0.882366	MBIP
Interstrand Cross-Link Repair (GO:0036297)	1936-01-01	0.525023	0.720713	1.36947	0.882366	FAAP100
Negative Regulation Of T Cell Proliferation (GO:0042130)	1936-01-01	0.525023	0.720713	1.36947	0.882366	BTN2A2
Positive Regulation Of RNA Splicing (GO:0033120)	1936-01-01	0.525023	0.720713	1.36947	0.882366	HSPA1A
Positive Regulation Of Double-Strand Break Repair Via Homologous Recombination (GO:1905168)	1936-01-01	0.525023	0.720713	1.36947	0.882366	WRAP53
Regulation Of T Cell Mediated Cytotoxicity (GO:0001914)	1936-01-01	0.525023	0.720713	1.36947	0.882366	MICB
Negative Regulation Of Apoptotic Process (GO:0043066)	10/482	0.526475	0.722159	1.0152	0.651302	ANKLE2;SHC1;SPHK1;TYRO3;PTK2B;LRP2;CARD14;PAX2;HSPA1B;HSPA1A
Exocytosis (GO:0006887)	1986-02-01	0.527624	0.722641	1.14116	0.729625	RPH3A;CADPS
Negative Regulation Of Angiogenesis (GO:0016525)	1986-02-01	0.527624	0.722641	1.14116	0.729625	DAB2IP;AMOT
Regulation Of Protein Kinase B Signaling (GO:0051896)	3/136	0.528615	0.723453	1.08104	0.689157	MC1R;IGF2;LRP2
Negative Regulation Of Macromolecule Metabolic Process (GO:0010605)	4/186	0.529725	0.723655	1.05326	0.66924	MSR1;DAXX;SMAD3;FLOT2
Protein Localization To Plasma Membrane (GO:0072659)	3/137	0.533559	0.723655	1.07292	0.673991	RAMP2;CAV3;FLOT2
Regulation Of Type II Interferon Production (GO:0032649)	1987-02-01	0.53385	0.723655	1.12768	0.707777	PDE4B;CD276
Regulation Of Defense Response To Virus By Host (GO:0050691)	1937-01-01	0.534754	0.723655	1.33136	0.833363	MICB
Aortic Valve Morphogenesis (GO:0003180)	1937-01-01	0.534754	0.723655	1.33136	0.833363	TGFBR2
Calcium Ion Import Across Plasma Membrane (GO:0098703)	1937-01-01	0.534754	0.723655	1.33136	0.833363	TRPV3
Spliceosomal snRNP Assembly (GO:0000387)	1937-01-01	0.534754	0.723655	1.33136	0.833363	PRPF8
Ventricular Septum Development (GO:0003281)	1937-01-01	0.534754	0.723655	1.33136	0.833363	TGFBR2
Melanosome Organization (GO:0032438)	1937-01-01	0.534754	0.723655	1.33136	0.833363	AP1M1
Negative Regulation Of Endothelial Cell Migration (GO:0010596)	1937-01-01	0.534754	0.723655	1.33136	0.833363	DAB2IP
Negative Regulation Of Stress-Activated MAPK Cascade (GO:0032873)	1937-01-01	0.534754	0.723655	1.33136	0.833363	DUSP19
Negative Regulation Of Transferase Activity (GO:0051348)	1937-01-01	0.534754	0.723655	1.33136	0.833363	NPRL2
Positive Regulation Of Receptor Signaling Pathway Via JAK-STAT (GO:0046427)	1937-01-01	0.534754	0.723655	1.33136	0.833363	PTK2B
Protein Acylation (GO:0043543)	1937-01-01	0.534754	0.723655	1.33136	0.833363	SPHK1
Regulation Of Cellular Component Biogenesis (GO:0044087)	1937-01-01	0.534754	0.723655	1.33136	0.833363	DAB2IP
Regulation Of Endothelial Cell Migration (GO:0010594)	1988-02-01	0.540019	0.729146	1.11451	0.686705	DAB2IP;PTK2B
Negative Regulation Of Neuron Death (GO:1901215)	1988-02-01	0.540019	0.729146	1.11451	0.686705	TYRO3;PTK2B
Positive Regulation Of Cell Adhesion (GO:0045785)	1988-02-01	0.540019	0.729146	1.11451	0.686705	TGM2;FSTL3
RNA 3'-End Processing (GO:0031123)	1938-01-01	0.544286	0.730552	1.29531	0.787913	SAGE2P
Response To Transforming Growth Factor Beta (GO:0071559)	1938-01-01	0.544286	0.730552	1.29531	0.787913	SMAD3
Establishment Of Protein Localization To Plasma Membrane (GO:0061951)	1938-01-01	0.544286	0.730552	1.29531	0.787913	MACF1
Membrane Assembly (GO:0071709)	1938-01-01	0.544286	0.730552	1.29531	0.787913	VPS4A
Membrane Fission (GO:0090148)	1938-01-01	0.544286	0.730552	1.29531	0.787913	VPS4A
Negative Regulation Of Epithelial Cell Apoptotic Process (GO:1904036)	1938-01-01	0.544286	0.730552	1.29531	0.787913	RAMP2
Positive Regulation Of Axonogenesis (GO:0050772)	1938-01-01	0.544286	0.730552	1.29531	0.787913	MACF1
Positive Regulation Of Protein Tyrosine Kinase Activity (GO:0061098)	1938-01-01	0.544286	0.730552	1.29531	0.787913	IL34
Sensory Perception Of Mechanical Stimulus (GO:0050954)	1989-02-01	0.546131	0.731386	1.10164	0.666378	SPNS2;LRP2
Sodium Ion Transport (GO:0006814)	1989-02-01	0.546131	0.731386	1.10164	0.666378	SLC6A9;SLC34A1
Positive Regulation Of Peptidyl-Serine Phosphorylation (GO:0033138)	1989-02-01	0.546131	0.731386	1.10164	0.666378	SH2D3A;TNKS1BP1
Intracellular Monoatomic Cation Homeostasis (GO:0030003)	4/190	0.546522	0.731386	1.0304	0.622548	TFR2;LCK;SLC8B1;CHERP
Regulation Of Peptidyl-Tyrosine Phosphorylation (GO:0050730)	1990-02-01	0.552187	0.733844	1.08907	0.646762	IGF2;PTK2B
Regulation Of Phosphatidylinositol 3-Kinase Signaling (GO:0014066)	1990-02-01	0.552187	0.733844	1.08907	0.646762	DAB2IP;EXTL3
Regulation Of Monoatomic Cation Transmembrane Transport (GO:1904062)	1939-01-01	0.553623	0.733844	1.26116	0.745688	RANGRF
Regulation Of Nitric Oxide Biosynthetic Process (GO:0045428)	1939-01-01	0.553623	0.733844	1.26116	0.745688	SMAD3
Regulation Of Protein Targeting To Mitochondrion (GO:1903214)	1939-01-01	0.553623	0.733844	1.26116	0.745688	SREBF1
Digestive Tract Development (GO:0048565)	1939-01-01	0.553623	0.733844	1.26116	0.745688	CCDC40
Vesicle Cytoskeletal Trafficking (GO:0099518)	1939-01-01	0.553623	0.733844	1.26116	0.745688	MYO15A
Vitamin Transport (GO:0051180)	1939-01-01	0.553623	0.733844	1.26116	0.745688	LRP2
Negative Regulation Of Mitochondrion Organization (GO:0010823)	1939-01-01	0.553623	0.733844	1.26116	0.745688	HSPA1A
Negative Regulation Of Proteasomal Protein Catabolic Process (GO:1901799)	1939-01-01	0.553623	0.733844	1.26116	0.745688	FHIT
Negative Regulation Of Ubiquitin-Dependent Protein Catabolic Process (GO:2000059)	1939-01-01	0.553623	0.733844	1.26116	0.745688	FHIT
Nuclear-Transcribed mRNA Catabolic Process, Deadenylation-Dependent Decay (GO:0000288)	1939-01-01	0.553623	0.733844	1.26116	0.745688	TNKS1BP1
Positive Regulation Of Intrinsic Apoptotic Signaling Pathway (GO:2001244)	1939-01-01	0.553623	0.733844	1.26116	0.745688	LCK
Protein Localization To Membrane (GO:0072657)	4/192	0.554803	0.73487	1.01933	0.600533	RAMP2;CAV3;FLOT2;SYNE3
Cilium Assembly (GO:0060271)	5/243	0.556916	0.735211	1.00638	0.589073	RSPH1;DNAH5;CFAP47;SPATA6;CCDC40
Protein Localization To Cell Periphery (GO:1990778)	3/142	0.557832	0.735211	1.03406	0.603577	RAMP2;CAV3;FLOT2
Regulation Of Epithelial Cell Proliferation (GO:0050678)	1991-02-01	0.558186	0.735211	1.07677	0.627828	DAB2IP;PAX2
Lymphocyte Differentiation (GO:0030098)	1991-02-01	0.558186	0.735211	1.07677	0.627828	LCK;PIK3R2
Regulation Of Actin Cytoskeleton Organization (GO:0032956)	1991-02-01	0.558186	0.735211	1.07677	0.627828	PTK2B;BAIAP2
Regulation Of Cell Differentiation (GO:0045595)	4/193	0.558913	0.735211	1.01389	0.589841	ZFHX2;BIN1;IGF2;FLOT2
Positive Regulation Of Transferase Activity (GO:0051347)	3/143	0.562595	0.735211	1.02662	0.590507	TYRO3;IGF2;WRAP53
Notch Signaling Pathway (GO:0007219)	1940-01-01	0.562769	0.735211	1.22876	0.706396	NOTCH3
Regulation Of Microtubule Polymerization (GO:0031113)	1940-01-01	0.562769	0.735211	1.22876	0.706396	CAV3
Aortic Valve Development (GO:0003176)	1940-01-01	0.562769	0.735211	1.22876	0.706396	TGFBR2
Regulation Of Protein Dephosphorylation (GO:0035304)	1940-01-01	0.562769	0.735211	1.22876	0.706396	ANKLE2
Cyclic-Nucleotide-Mediated Signaling (GO:0019935)	1940-01-01	0.562769	0.735211	1.22876	0.706396	GUCY1B2
Retinoid Metabolic Process (GO:0001523)	1940-01-01	0.562769	0.735211	1.22876	0.706396	LRP2
Establishment Or Maintenance Of Epithelial Cell Apical/Basal Polarity (GO:0045197)	1940-01-01	0.562769	0.735211	1.22876	0.706396	MTCL1
Negative Regulation Of Cell-Cell Adhesion (GO:0022408)	1940-01-01	0.562769	0.735211	1.22876	0.706396	AKNA
Positive Regulation Of Catalytic Activity (GO:0043085)	1940-01-01	0.562769	0.735211	1.22876	0.706396	IGF2
Positive Regulation Of Monoatomic Ion Transport (GO:0043270)	1940-01-01	0.562769	0.735211	1.22876	0.706396	MYLK
Positive Regulation Of Myeloid Leukocyte Differentiation (GO:0002763)	1940-01-01	0.562769	0.735211	1.22876	0.706396	IL34
Positive Regulation Of Wound Healing (GO:0090303)	1940-01-01	0.562769	0.735211	1.22876	0.706396	MYLK
Sensory Perception Of Sound (GO:0007605)	1992-02-01	0.564127	0.735394	1.06476	0.609547	SPNS2;LRP2
Steroid Metabolic Process (GO:0008202)	1992-02-01	0.564127	0.735394	1.06476	0.609547	CYP2E1;LRP2
Positive Regulation Of Neuron Projection Development (GO:0010976)	1992-02-01	0.564127	0.735394	1.06476	0.609547	DAB2IP;PTK2B
Actin Filament Organization (GO:0007015)	3/144	0.567327	0.738924	1.01929	0.577751	MYO15A;BAIAP2;SHROOM4
Regulation Of Peptidyl-Serine Phosphorylation (GO:0033135)	1993-02-01	0.570011	0.738924	1.053	0.591892	SH2D3A;TNKS1BP1
Negative Regulation Of Amide Metabolic Process (GO:0034249)	1993-02-01	0.570011	0.738924	1.053	0.591892	BIN1;SPHK1
Protein O-linked Glycosylation (GO:0006493)	1993-02-01	0.570011	0.738924	1.053	0.591892	GALNT17;LARGE2
Positive Regulation Of Protein Metabolic Process (GO:0051247)	4/196	0.57112	0.738924	0.997891	0.558975	SLC6A9;TFR2;AGO2;DAB2IP
Regulation Of Heart Rate By Cardiac Conduction (GO:0086091)	1941-01-01	0.571728	0.738924	1.19798	0.669779	BIN1
Acylglycerol Metabolic Process (GO:0006639)	1941-01-01	0.571728	0.738924	1.19798	0.669779	CAV3
Regulation Of Microtubule-Based Process (GO:0032886)	1941-01-01	0.571728	0.738924	1.19798	0.669779	MACF1
Stem Cell Differentiation (GO:0048863)	1941-01-01	0.571728	0.738924	1.19798	0.669779	PAX2
Heart Contraction (GO:0060047)	1941-01-01	0.571728	0.738924	1.19798	0.669779	RANGRF
Non-Canonical Wnt Signaling Pathway (GO:0035567)	1941-01-01	0.571728	0.738924	1.19798	0.669779	CELSR3
Positive Regulation Of Viral Process (GO:0048524)	1941-01-01	0.571728	0.738924	1.19798	0.669779	TYRO3
Sphingolipid Metabolic Process (GO:0006665)	1994-02-01	0.575837	0.742684	1.0415	0.574837	SPHK1;SPNS2
Negative Regulation Of Response To External Stimulus (GO:0032102)	3/146	0.576695	0.742684	1.00493	0.553153	LRFN5;TYRO3;EXTL3
Positive Regulation Of Cellular Catabolic Process (GO:0031331)	3/146	0.576695	0.742684	1.00493	0.553153	NPRL2;ZSWIM8;AMBRA1
Amino Acid Transmembrane Transport (GO:0003333)	1942-01-01	0.580504	0.742684	1.1687	0.635606	LRRC8E
Regulation Of Neurotransmitter Receptor Activity (GO:0099601)	1942-01-01	0.580504	0.742684	1.1687	0.635606	PTK2B
Regulation Of Osteoclast Differentiation (GO:0045670)	1942-01-01	0.580504	0.742684	1.1687	0.635606	FSTL3
Cardiac Ventricle Morphogenesis (GO:0003208)	1942-01-01	0.580504	0.742684	1.1687	0.635606	TGFBR2
Cellular Response To Glucose Starvation (GO:0042149)	1942-01-01	0.580504	0.742684	1.1687	0.635606	SZT2
Substantia Nigra Development (GO:0021762)	1942-01-01	0.580504	0.742684	1.1687	0.635606	G6PD
Lipid Modification (GO:0030258)	1942-01-01	0.580504	0.742684	1.1687	0.635606	CYP2E1
Modulation By Host Of Symbiont Process (GO:0051851)	1942-01-01	0.580504	0.742684	1.1687	0.635606	FASN
Monoatomic Cation Transport (GO:0006812)	1942-01-01	0.580504	0.742684	1.1687	0.635606	LRP2
Negative Regulation Of I-kappaB kinase/NF-kappaB Signaling (GO:0043124)	1942-01-01	0.580504	0.742684	1.1687	0.635606	DAB2IP
Organic Hydroxy Compound Biosynthetic Process (GO:1901617)	1942-01-01	0.580504	0.742684	1.1687	0.635606	SLC27A5
Dephosphorylation (GO:0016311)	3/147	0.581332	0.742684	0.997896	0.541292	DUSP4;PTPRA;PPM1H
Protein Glycosylation (GO:0006486)	3/147	0.581332	0.742684	0.997896	0.541292	GFPT2;GALNT17;LARGE2
Positive Regulation Of Transmembrane Receptor Protein Serine/Threonine Kinase Signaling Pathway (GO:0090100)	1995-02-01	0.581605	0.742684	1.03025	0.558358	ELAPOR2;TGFBR2
Regulation Of Endothelial Cell Apoptotic Process (GO:2000351)	1943-01-01	0.589101	0.746992	1.14081	0.603671	RAMP2
Regulation Of Filopodium Assembly (GO:0051489)	1943-01-01	0.589101	0.746992	1.14081	0.603671	NEURL1
Skeletal System Morphogenesis (GO:0048705)	1943-01-01	0.589101	0.746992	1.14081	0.603671	HOXC4
Ephrin Receptor Signaling Pathway (GO:0048013)	1943-01-01	0.589101	0.746992	1.14081	0.603671	ARHGEF7
Glycolipid Biosynthetic Process (GO:0009247)	1943-01-01	0.589101	0.746992	1.14081	0.603671	PIGG
Intracellular Steroid Hormone Receptor Signaling Pathway (GO:0030518)	1943-01-01	0.589101	0.746992	1.14081	0.603671	DAXX
mRNA Destabilization (GO:0061157)	1943-01-01	0.589101	0.746992	1.14081	0.603671	AGO2
Neurotransmitter Secretion (GO:0007269)	1943-01-01	0.589101	0.746992	1.14081	0.603671	RPH3A
Positive Regulation Of T Cell Mediated Immunity (GO:0002711)	1943-01-01	0.589101	0.746992	1.14081	0.603671	MICB
Regulation Of Cellular Component Size (GO:0032535)	1943-01-01	0.589101	0.746992	1.14081	0.603671	RAP1GAP2
Negative Regulation Of Nucleic Acid-Templated Transcription (GO:1903507)	9/456	0.590015	0.747628	0.963624	0.508415	DAXX;SHC1;NACC1;BHLHE40;DAB2IP;ZNF746;ZNF568;TBR1;PAX2
Skeletal System Development (GO:0001501)	3/149	0.590508	0.74773	0.984125	0.518409	COL10A1;ETS2;TGM2
Cellular Response To Oxygen-Containing Compound (GO:1901701)	8/406	0.592015	0.748752	0.962067	0.504337	PEX5;NEURL1;DAB2IP;PDE4B;PTK2B;MPV17;PAX2;TGM2
Regulation Of Defense Response (GO:0031347)	1997-02-01	0.592968	0.748752	1.00846	0.527034	AKNA;TKFC
Regulation Of Protein Localization (GO:0032880)	1997-02-01	0.592968	0.748752	1.00846	0.527034	VPS4A;STX10
Monocarboxylic Acid Metabolic Process (GO:0032787)	1997-02-01	0.592968	0.748752	1.00846	0.527034	FASN;CPT1C
Regulation Of Insulin Receptor Signaling Pathway (GO:0046626)	1944-01-01	0.597522	0.750839	1.11423	0.573787	IGF2
Bone Development (GO:0060348)	1944-01-01	0.597522	0.750839	1.11423	0.573787	TGM2
Cellular Response To Ketone (GO:1901655)	1944-01-01	0.597522	0.750839	1.11423	0.573787	MAP4K1
Embryonic Organ Morphogenesis (GO:0048562)	1944-01-01	0.597522	0.750839	1.11423	0.573787	HOXC4
Mitotic Spindle Assembly (GO:0090307)	1944-01-01	0.597522	0.750839	1.11423	0.573787	SPICE1
Nucleobase-Containing Compound Catabolic Process (GO:0034655)	1944-01-01	0.597522	0.750839	1.11423	0.573787	SIDT2
Positive Regulation Of Leukocyte Cell-Cell Adhesion (GO:1903039)	1944-01-01	0.597522	0.750839	1.11423	0.573787	LCK
RNA Splicing (GO:0008380)	1998-02-01	0.598563	0.751626	0.997901	0.512146	HNRNPH3;PRPF8
Cellular Response To Organic Cyclic Compound (GO:0071407)	3/152	0.604028	0.756483	0.964162	0.486067	HSPA1B;TGM2;HSPA1A
Regulation Of Cellular Metabolic Process (GO:0031323)	1945-01-01	0.605771	0.756483	1.08885	0.545789	MPV17
I-kappaB kinase/NF-kappaB Signaling (GO:0007249)	1945-01-01	0.605771	0.756483	1.08885	0.545789	DAB2IP
Regulation Of Telomerase Activity (GO:0051972)	1945-01-01	0.605771	0.756483	1.08885	0.545789	WRAP53
Establishment Of Protein Localization To Extracellular Region (GO:0035592)	1945-01-01	0.605771	0.756483	1.08885	0.545789	GSDMD
Negative Regulation Of Response To Biotic Stimulus (GO:0002832)	1945-01-01	0.605771	0.756483	1.08885	0.545789	TYRO3
Organic Hydroxy Compound Transport (GO:0015850)	1945-01-01	0.605771	0.756483	1.08885	0.545789	SLC27A5
Regulation Of Apoptotic Signaling Pathway (GO:2001233)	1945-01-01	0.605771	0.756483	1.08885	0.545789	DAB2IP
Regulation Of Cellular Component Organization (GO:0051128)	3/153	0.608469	0.759329	0.957685	0.475787	SLITRK2;SPHK1;DAB2IP
B Cell Receptor Signaling Pathway (GO:0050853)	1946-01-01	0.613851	0.759766	1.0646	0.519527	LCK
Regulation Of Cytokine Production Involved In Inflammatory Response (GO:1900015)	1946-01-01	0.613851	0.759766	1.0646	0.519527	EXTL3
Regulation Of Epidermal Growth Factor Receptor Signaling Pathway (GO:0042058)	1946-01-01	0.613851	0.759766	1.0646	0.519527	DAB2IP
Antiviral Innate Immune Response (GO:0140374)	1946-01-01	0.613851	0.759766	1.0646	0.519527	TRIM7
Cardiac Conduction (GO:0061337)	1946-01-01	0.613851	0.759766	1.0646	0.519527	BIN1
Response To Glucose (GO:0009749)	1946-01-01	0.613851	0.759766	1.0646	0.519527	PAX2
Response To Hydrogen Peroxide (GO:0042542)	1946-01-01	0.613851	0.759766	1.0646	0.519527	PAX2
Development Of Primary Male Sexual Characteristics (GO:0046546)	1946-01-01	0.613851	0.759766	1.0646	0.519527	LRP2
Vacuolar Transport (GO:0007034)	1946-01-01	0.613851	0.759766	1.0646	0.519527	HSPA1A
Homotypic Cell-Cell Adhesion (GO:0034109)	1946-01-01	0.613851	0.759766	1.0646	0.519527	TYRO3
Male Gonad Development (GO:0008584)	1946-01-01	0.613851	0.759766	1.0646	0.519527	LRP2
Positive Regulation Of Peptide Hormone Secretion (GO:0090277)	1946-01-01	0.613851	0.759766	1.0646	0.519527	TFR2
Visual Perception (GO:0007601)	2/101	0.615	0.760669	0.967513	0.47034	CACNA2D4;PAX2
Protein Modification By Small Protein Conjugation (GO:0032446)	7/364	0.618009	0.761243	0.938152	0.451488	TRIM7;ZSWIM8;MIB2;RNF39;KEAP1;RNF220;BSPRY
Calcium Ion Homeostasis (GO:0055074)	2/102	0.620363	0.761243	0.957789	0.457297	SLC8B1;CHERP
Protein Catabolic Process (GO:0030163)	2/102	0.620363	0.761243	0.957789	0.457297	DAB2IP;SFI1
Regulation Of RNA Splicing (GO:0043484)	2/102	0.620363	0.761243	0.957789	0.457297	HNRNPH3;HSPA1A
Golgi To Plasma Membrane Transport (GO:0006893)	1947-01-01	0.621766	0.761243	1.0414	0.494865	MACF1
Regulation Of Interleukin-2 Production (GO:0032663)	1947-01-01	0.621766	0.761243	1.0414	0.494865	PDE4B
Bicellular Tight Junction Assembly (GO:0070830)	1947-01-01	0.621766	0.761243	1.0414	0.494865	RAMP2
Regulation Of Wound Healing (GO:0061041)	1947-01-01	0.621766	0.761243	1.0414	0.494865	MYLK
Cognition (GO:0050890)	1947-01-01	0.621766	0.761243	1.0414	0.494865	SHROOM4
Secondary Alcohol Metabolic Process (GO:1902652)	1947-01-01	0.621766	0.761243	1.0414	0.494865	LCAT
Negative Regulation Of Hydrolase Activity (GO:0051346)	1947-01-01	0.621766	0.761243	1.0414	0.494865	DAB2IP
Negative Regulation Of Tumor Necrosis Factor Production (GO:0032720)	1947-01-01	0.621766	0.761243	1.0414	0.494865	MC1R
Positive Regulation Of TOR Signaling (GO:0032008)	1947-01-01	0.621766	0.761243	1.0414	0.494865	CLEC16A
Positive Regulation Of Lymphocyte Activation (GO:0051251)	1947-01-01	0.621766	0.761243	1.0414	0.494865	LCK
Regulation Of T Cell Differentiation (GO:0045580)	1947-01-01	0.621766	0.761243	1.0414	0.494865	ZNF683
Supramolecular Fiber Organization (GO:0097435)	6/316	0.629357	0.767107	0.926007	0.428793	MYO15A;KRT7;KIF2C;TUBGCP3;FBLN5;SHROOM4
Cellular Response To Radiation (GO:0071478)	1948-01-01	0.629519	0.767107	1.01919	0.471681	TNKS1BP1
Cytoplasmic Microtubule Organization (GO:0031122)	1948-01-01	0.629519	0.767107	1.01919	0.471681	TUBGCP3
Retrograde Vesicle-Mediated Transport, Golgi To Endoplasmic Reticulum (GO:0006890)	1948-01-01	0.629519	0.767107	1.01919	0.471681	COPB2
Positive Regulation Of Reactive Oxygen Species Metabolic Process (GO:2000379)	1948-01-01	0.629519	0.767107	1.01919	0.471681	TGFBR2
Post-Translational Protein Modification (GO:0043687)	1948-01-01	0.629519	0.767107	1.01919	0.471681	BAZ1B
Regulation Of DNA Binding (GO:0051101)	1948-01-01	0.629519	0.767107	1.01919	0.471681	RNF220
Macroautophagy (GO:0016236)	2/104	0.630917	0.768294	0.938912	0.432446	VPS4A;TECPR1
Regulation Of Protein Phosphorylation (GO:0001932)	5/265	0.633597	0.770147	0.920173	0.419914	DAXX;IL34;IGF2;DAB2IP;CARD14
Regulation Of Neuron Apoptotic Process (GO:0043523)	2/105	0.636107	0.770147	0.929749	0.420608	TYRO3;PTK2B
Intrinsic Apoptotic Signaling Pathway (GO:0097193)	2/105	0.636107	0.770147	0.929749	0.420608	DAB2IP;FHIT
Regulation Of Mitotic Metaphase/Anaphase Transition (GO:0030071)	1949-01-01	0.637113	0.770147	0.997906	0.449864	ESPL1
Unsaturated Fatty Acid Metabolic Process (GO:0033559)	1949-01-01	0.637113	0.770147	0.997906	0.449864	RAPSN
Heterophilic Cell-Cell Adhesion Via Plasma Membrane Cell Adhesion Molecules (GO:0007157)	1949-01-01	0.637113	0.770147	0.997906	0.449864	TENM4
Negative Regulation Of Cysteine-Type Endopeptidase Activity Involved In Apoptotic Process (GO:0043154)	1949-01-01	0.637113	0.770147	0.997906	0.449864	PAX2
Negative Regulation Of Tumor Necrosis Factor Superfamily Cytokine Production (GO:1903556)	1949-01-01	0.637113	0.770147	0.997906	0.449864	MC1R
Positive Regulation Of Pathway-Restricted SMAD Protein Phosphorylation (GO:0010862)	1949-01-01	0.637113	0.770147	0.997906	0.449864	TGFBR2
Proton Transmembrane Transport (GO:1902600)	1949-01-01	0.637113	0.770147	0.997906	0.449864	ATP5PO
Regulation Of Cell Communication (GO:0010646)	1949-01-01	0.637113	0.770147	0.997906	0.449864	ITGB6
Proteasome-Mediated Ubiquitin-Dependent Protein Catabolic Process (GO:0043161)	6/319	0.638415	0.771205	0.916988	0.411514	RHBDD2;DERL3;ZSWIM8;AMBRA1;ANAPC1;HERPUD1
mRNA Processing (GO:0006397)	4/214	0.640196	0.772841	0.911511	0.406517	PHF5A;HNRNPH3;PRPF8;CMTR2
Positive Regulation Of Cell Growth (GO:0030307)	2/106	0.64124	0.773463	0.920762	0.409141	MACF1;SPHK1
G Protein-Coupled Receptor Signaling Pathway, Coupled To Cyclic Nucleotide Second Messenger (GO:0007187)	1950-01-01	0.644553	0.773463	0.977491	0.429313	MC1R
Blood Circulation (GO:0008015)	1950-01-01	0.644553	0.773463	0.977491	0.429313	RANGRF
Dicarboxylic Acid Metabolic Process (GO:0043648)	1950-01-01	0.644553	0.773463	0.977491	0.429313	GPT2
Steroid Biosynthetic Process (GO:0006694)	1950-01-01	0.644553	0.773463	0.977491	0.429313	SLC27A5
Intracellular Iron Ion Homeostasis (GO:0006879)	1950-01-01	0.644553	0.773463	0.977491	0.429313	TFR2
Positive Regulation Of Cell Death (GO:0010942)	1950-01-01	0.644553	0.773463	0.977491	0.429313	DAXX
Positive Regulation Of Developmental Growth (GO:0048639)	1950-01-01	0.644553	0.773463	0.977491	0.429313	MACF1
Positive Regulation Of Fat Cell Differentiation (GO:0045600)	1950-01-01	0.644553	0.773463	0.977491	0.429313	FNDC5
Monoatomic Ion Transport (GO:0006811)	2/107	0.646316	0.775022	0.911946	0.398033	SLC34A1;SLC8B1
Mitochondrion Organization (GO:0007005)	3/162	0.646927	0.775022	0.903058	0.393302	CLUH;MPV17;SFI1
Adenylate Cyclase-Modulating G Protein-Coupled Receptor Signaling Pathway (GO:0007188)	3/163	0.651031	0.775022	0.897368	0.385149	RAMP2;MC1R;CCR3
Response To Tumor Necrosis Factor (GO:0034612)	2/108	0.651336	0.775022	0.903296	0.38727	SPHK1;DAB2IP
SMAD Protein Signal Transduction (GO:0060395)	1951-01-01	0.65184	0.775022	0.957892	0.409936	SMAD3
Amide Biosynthetic Process (GO:0043604)	1951-01-01	0.65184	0.775022	0.957892	0.409936	ABCA8
Regulation Of Release Of Sequestered Calcium Ion Into Cytosol (GO:0051279)	1951-01-01	0.65184	0.775022	0.957892	0.409936	PTK2B
Regulation Of Stress-Activated MAPK Cascade (GO:0032872)	1951-01-01	0.65184	0.775022	0.957892	0.409936	DAB2IP
Regulation Of Substrate Adhesion-Dependent Cell Spreading (GO:1900024)	1951-01-01	0.65184	0.775022	0.957892	0.409936	ARHGEF7
Negative Regulation Of Gene Expression, Epigenetic (GO:0045814)	1951-01-01	0.65184	0.775022	0.957892	0.409936	TRIM37
Positive Regulation Of DNA Recombination (GO:0045911)	1951-01-01	0.65184	0.775022	0.957892	0.409936	WRAP53
Positive Regulation Of Leukocyte Mediated Cytotoxicity (GO:0001912)	1951-01-01	0.65184	0.775022	0.957892	0.409936	MICB
Positive Regulation Of Protein Localization To Cell Periphery (GO:1904377)	1951-01-01	0.65184	0.775022	0.957892	0.409936	RANGRF
Positive Regulation Of Protein Localization To Plasma Membrane (GO:1903078)	1951-01-01	0.65184	0.775022	0.957892	0.409936	RANGRF
Cellular Response To Salt (GO:1902075)	2/109	0.656298	0.77879	0.894808	0.37684	DAXX;TGM2
Positive Regulation Of Wnt Signaling Pathway (GO:0030177)	2/109	0.656298	0.77879	0.894808	0.37684	MACF1;RNF220
Positive Regulation Of Cysteine-Type Endopeptidase Activity Involved In Apoptotic Process (GO:0043280)	2/109	0.656298	0.77879	0.894808	0.37684	SMAD3;LCK
Positive Regulation Of Cell Population Proliferation (GO:0008284)	9/483	0.658085	0.779418	0.907453	0.379697	SHC1;SPHK1;FSHB;IL34;NACC1;IGF2;PTK2B;PAX2;TGFBR2
Arachidonic Acid Metabolic Process (GO:0019369)	1952-01-01	0.658978	0.779418	0.939062	0.39165	CYP2E1
Cellular Response To Ionizing Radiation (GO:0071479)	1952-01-01	0.658978	0.779418	0.939062	0.39165	TNKS1BP1
Negative Regulation Of Innate Immune Response (GO:0045824)	1952-01-01	0.658978	0.779418	0.939062	0.39165	TYRO3
Regulation Of Cell Development (GO:0060284)	1952-01-01	0.658978	0.779418	0.939062	0.39165	BHLHE40
Negative Regulation Of Cell Population Proliferation (GO:0008285)	7/379	0.659731	0.779799	0.899622	0.374174	SMAD3;NEURL1;DAB2IP;PTK2B;HSPA1B;HSPA1A;CHERP
Adenylate Cyclase-Activating G Protein-Coupled Receptor Signaling Pathway (GO:0007189)	2/110	0.661204	0.780522	0.886477	0.366729	RAMP2;MC1R
Response To Lipid (GO:0033993)	2/110	0.661204	0.780522	0.886477	0.366729	PAQR8;MICB
NADH Dehydrogenase Complex Assembly (GO:0010257)	1953-01-01	0.66597	0.780555	0.920956	0.374379	NDUFAF3
Actin Polymerization Or Depolymerization (GO:0008154)	1953-01-01	0.66597	0.780555	0.920956	0.374379	MICAL3
Regulation Of Proteasomal Protein Catabolic Process (GO:0061136)	1953-01-01	0.66597	0.780555	0.920956	0.374379	DAB2IP
Cellular Response To Alcohol (GO:0097306)	1953-01-01	0.66597	0.780555	0.920956	0.374379	MAP4K1
Spermatid Development (GO:0007286)	1953-01-01	0.66597	0.780555	0.920956	0.374379	RSPH1
Tight Junction Assembly (GO:0120192)	1953-01-01	0.66597	0.780555	0.920956	0.374379	RAMP2
Gonad Development (GO:0008406)	1953-01-01	0.66597	0.780555	0.920956	0.374379	LRP2
Mitochondrial Respiratory Chain Complex I Assembly (GO:0032981)	1953-01-01	0.66597	0.780555	0.920956	0.374379	NDUFAF3
Negative Regulation Of Cysteine-Type Endopeptidase Activity (GO:2000117)	1953-01-01	0.66597	0.780555	0.920956	0.374379	PAX2
Positive Regulation Of NIK/NF-kappaB Signaling (GO:1901224)	1953-01-01	0.66597	0.780555	0.920956	0.374379	SPHK1
Proton Motive Force-Driven Mitochondrial ATP Synthesis (GO:0042776)	1953-01-01	0.66597	0.780555	0.920956	0.374379	ATP5PO
Regulation Of Cytokine Production (GO:0001817)	3/167	0.667105	0.780875	0.8753	0.354328	BTNL9;BTN2A2;CD276
Membrane Organization (GO:0061024)	3/167	0.667105	0.780875	0.8753	0.354328	CAV3;BIN1;VPS4A
Regulation Of Protein Serine/Threonine Kinase Activity (GO:0071900)	2/112	0.670847	0.783514	0.87027	0.347424	DUSP19;DAB2IP
Regulation Of Exocytosis (GO:0017157)	1954-01-01	0.672819	0.783514	0.903533	0.358051	CADPS
Apical Junction Assembly (GO:0043297)	1954-01-01	0.672819	0.783514	0.903533	0.358051	RAMP2
Regulation Of Myoblast Differentiation (GO:0045661)	1954-01-01	0.672819	0.783514	0.903533	0.358051	FLOT2
Epidermal Cell Differentiation (GO:0009913)	1954-01-01	0.672819	0.783514	0.903533	0.358051	OVOL1
Monoatomic Anion Transmembrane Transport (GO:0098656)	1954-01-01	0.672819	0.783514	0.903533	0.358051	LRRC8E
Negative Regulation Of Protein Catabolic Process (GO:0042177)	1954-01-01	0.672819	0.783514	0.903533	0.358051	DAB2IP
Positive Regulation Of Leukocyte Chemotaxis (GO:0002690)	1954-01-01	0.672819	0.783514	0.903533	0.358051	IL34
Positive Regulation Of Cellular Process (GO:0048522)	11/594	0.673602	0.783923	0.901109	0.356042	TENM4;SHC1;SPHK1;FSHB;IL34;NACC1;IGF2;PTK2B;NCMAP;TGM2;TGFBR2
Phosphatidylcholine Metabolic Process (GO:0046470)	1955-01-01	0.679528	0.789804	0.886756	0.342604	LCAT
Purine Ribonucleotide Biosynthetic Process (GO:0009152)	1955-01-01	0.679528	0.789804	0.886756	0.342604	ATP5PO
Metal Ion Transport (GO:0030001)	3/171	0.682634	0.792906	0.854284	0.326163	RAMP2;SLC34A1;LRP2
Regulation Of Cell Growth (GO:0001558)	4/227	0.685341	0.794893	0.857798	0.32411	SMAD3;SPHK1;HSPA1B;HSPA1A
Regulation Of Mitotic Nuclear Division (GO:0007088)	1956-01-01	0.6861	0.794893	0.870588	0.327979	IGF2
Positive Regulation Of Cellular Metabolic Process (GO:0031325)	1956-01-01	0.6861	0.794893	0.870588	0.327979	TGFBR2
post-Golgi Vesicle-Mediated Transport (GO:0006892)	1956-01-01	0.6861	0.794893	0.870588	0.327979	SCAMP3
Chemokine-Mediated Signaling Pathway (GO:0070098)	1957-01-01	0.692537	0.800444	0.854998	0.314121	PTK2B
Striated Muscle Contraction (GO:0006941)	1957-01-01	0.692537	0.800444	0.854998	0.314121	TNNI1
Positive Regulation Of Interleukin-1 Beta Production (GO:0032731)	1957-01-01	0.692537	0.800444	0.854998	0.314121	GSDMD
Cellular Response To Molecule Of Bacterial Origin (GO:0071219)	2/117	0.693984	0.800444	0.832219	0.304015	PDE4B;DAB2IP
Positive Regulation Of Protein Serine/Threonine Kinase Activity (GO:0071902)	2/117	0.693984	0.800444	0.832219	0.304015	IL34;DAB2IP
Positive Regulation Of Cell Cycle Process (GO:0090068)	2/118	0.698447	0.800444	0.825002	0.29609	IGF2;SMC4
Positive Regulation Of Cell Projection Organization (GO:0031346)	2/118	0.698447	0.800444	0.825002	0.29609	DAB2IP;PTK2B
Regulation Of Neuron Death (GO:1901214)	1958-01-01	0.698842	0.800444	0.839955	0.300981	DAXX
Renal System Development (GO:0072001)	1958-01-01	0.698842	0.800444	0.839955	0.300981	PAX2
Response To Organic Cyclic Compound (GO:0014070)	1958-01-01	0.698842	0.800444	0.839955	0.300981	PAQR8
Eye Development (GO:0001654)	1958-01-01	0.698842	0.800444	0.839955	0.300981	PAX2
Glycosaminoglycan Biosynthetic Process (GO:0006024)	1958-01-01	0.698842	0.800444	0.839955	0.300981	XYLT2
Inorganic Anion Transport (GO:0015698)	1958-01-01	0.698842	0.800444	0.839955	0.300981	SLC34A1
mRNA Transport (GO:0051028)	1958-01-01	0.698842	0.800444	0.839955	0.300981	PEG10
Memory (GO:0007613)	1958-01-01	0.698842	0.800444	0.839955	0.300981	LRRC66
Muscle Organ Development (GO:0007517)	1958-01-01	0.698842	0.800444	0.839955	0.300981	CAV3
Peptidyl-Threonine Phosphorylation (GO:0018107)	1958-01-01	0.698842	0.800444	0.839955	0.300981	TGFBR2
Regulation Of Bone Mineralization (GO:0030500)	1958-01-01	0.698842	0.800444	0.839955	0.300981	PTK2B
Regulation Of Multicellular Organismal Development (GO:2000026)	1959-01-01	0.705019	0.804974	0.825431	0.288513	MBIP
Cellular Response To Chemokine (GO:1990869)	1959-01-01	0.705019	0.804974	0.825431	0.288513	PTK2B
Microtubule Cytoskeleton Organization Involved In Mitosis (GO:1902850)	1959-01-01	0.705019	0.804974	0.825431	0.288513	ESPL1
Mitotic Cytokinesis (GO:0000281)	1959-01-01	0.705019	0.804974	0.825431	0.288513	ESPL1
Phospholipid Transport (GO:0015914)	1959-01-01	0.705019	0.804974	0.825431	0.288513	ABCA3
Sterol Metabolic Process (GO:0016125)	1960-01-01	0.711069	0.809332	0.811399	0.276675	LCAT
Histone Acetylation (GO:0016573)	1960-01-01	0.711069	0.809332	0.811399	0.276675	MBIP
Negative Regulation Of Peptidase Activity (GO:0010466)	1960-01-01	0.711069	0.809332	0.811399	0.276675	SERPINA6
protein-DNA Complex Organization (GO:0071824)	1960-01-01	0.711069	0.809332	0.811399	0.276675	PHF1
Proton Motive Force-Driven ATP Synthesis (GO:0015986)	1960-01-01	0.711069	0.809332	0.811399	0.276675	ATP5PO
DNA Repair (GO:0006281)	5/291	0.713003	0.811024	0.835396	0.282589	ALKBH2;MC1R;TNKS1BP1;WRNIP1;FAAP100
RNA Splicing, Via Transesterification Reactions With Bulged Adenosine As Nucleophile (GO:0000377)	3/180	0.715589	0.813142	0.81047	0.271224	PHF5A;HNRNPH3;PRPF8
Protein Localization To Nucleus (GO:0034504)	2/122	0.715762	0.813142	0.797338	0.266636	RANGRF;SPRN
Fatty Acid Catabolic Process (GO:0009062)	1961-01-01	0.716996	0.814033	0.797835	0.265428	LPIN3
Regulation Of Cell Motility (GO:2000145)	2/123	0.719959	0.816885	0.790708	0.259796	MACF1;AMOT
Positive Regulation Of DNA-templated Transcription (GO:0045893)	23/1243	0.720864	0.816983	0.89725	0.293675	SREBF1;AKNA;SMAD3;SHC1;FSHB;DAB2IP;IGF2;ZNF76;TCF20;PIK3R2;BAZ1B;ZFX;PAX2;ETS2;FSTL3;NSD3;PHF5A;MC1R;TFR2;AGO2;ZNF746;HOXC4;LPIN3
Regulation Of Embryonic Development (GO:0045995)	1962-01-01	0.722801	0.816983	0.784716	0.254736	MBIP
Cell Junction Organization (GO:0034330)	1962-01-01	0.722801	0.816983	0.784716	0.254736	SMAD3
Spliceosomal Complex Assembly (GO:0000245)	1962-01-01	0.722801	0.816983	0.784716	0.254736	PHF5A
Protein Lipidation (GO:0006497)	1962-01-01	0.722801	0.816983	0.784716	0.254736	PIGG
Regulation Of T Cell Activation (GO:0050863)	1962-01-01	0.722801	0.816983	0.784716	0.254736	LCK
Cellular Response To Lipopolysaccharide (GO:0071222)	2/124	0.724103	0.816983	0.784187	0.253152	PDE4B;DAB2IP
Neuron Projection Guidance (GO:0097485)	2/124	0.724103	0.816983	0.784187	0.253152	NOTCH3;TRIO
Protein Dephosphorylation (GO:0006470)	2/124	0.724103	0.816983	0.784187	0.253152	PTPRA;PPM1H
Regulation Of Mitotic Cell Cycle (GO:0007346)	2/125	0.728196	0.819887	0.777771	0.246698	SPHK1;ANAPC1
Inorganic Anion Transmembrane Transport (GO:0098661)	1963-01-01	0.728487	0.819887	0.772019	0.244565	SLC37A3
Phosphatidylinositol Metabolic Process (GO:0046488)	1963-01-01	0.728487	0.819887	0.772019	0.244565	PI4KB
Positive Regulation Of Mitotic Cell Cycle Phase Transition (GO:1901992)	1963-01-01	0.728487	0.819887	0.772019	0.244565	ESPL1
Regulation Of Intracellular Signal Transduction (GO:1902531)	5/297	0.729494	0.820511	0.817976	0.257993	NEK8;TRIO;SEZ6;DAB2IP;ARHGAP19
Positive Regulation Of T Cell Differentiation (GO:0045582)	1964-01-01	0.734057	0.824109	0.759726	0.234884	AMBRA1
Positive Regulation Of Interleukin-1 Production (GO:0032732)	1964-01-01	0.734057	0.824109	0.759726	0.234884	GSDMD
Positive Regulation Of Macroautophagy (GO:0016239)	1964-01-01	0.734057	0.824109	0.759726	0.234884	AMBRA1
Regulation Of Response To External Stimulus (GO:0032101)	2/127	0.736226	0.826032	0.765248	0.234332	AKNA;TKFC
Regulation Of ERK1 And ERK2 Cascade (GO:0070372)	4/244	0.738147	0.827674	0.796337	0.241778	DUSP4;SHC1;DAB2IP;PTK2B
Positive Regulation Of DNA Biosynthetic Process (GO:2000573)	1965-01-01	0.739513	0.828181	0.747817	0.225664	WRAP53
Positive Regulation Of Cell Cycle (GO:0045787)	1965-01-01	0.739513	0.828181	0.747817	0.225664	SPHK1
Regulation Of Transcription By RNA Polymerase II (GO:0006357)	38/2028	0.740661	0.828955	0.905929	0.271971	AKNA;PHF1;TCF20;PIK3R2;ZBTB22;ETS2;FSTL3;SALL4;ZSCAN32;NACC1;MBIP;ZNF746;HOXC4;ZNF568;ZNF683;BRD2;ZNF660;SREBF1;SMAD3;ZFHX2;FSHB;PAX4;DAB2IP;IGF2;ZNF76;TBR1;BAZ1B;OVOL1;ZFX;PAX2;MC1R;BIN1;TFR2;AGO2;BHLHE40;TRIM37;LPIN3;HSPA1A
Negative Regulation Of Immune Response (GO:0050777)	1966-01-01	0.744857	0.832623	0.736275	0.216879	TYRO3
Peptidyl-Threonine Modification (GO:0018210)	1966-01-01	0.744857	0.832623	0.736275	0.216879	TGFBR2
Golgi Organization (GO:0007030)	2/130	0.747893	0.834986	0.747197	0.217057	ARL1;ARHGEF7
Regulation Of Cell Cycle Process (GO:0010564)	2/130	0.747893	0.834986	0.747197	0.217057	BIN1;KIF2C
Protein Secretion (GO:0009306)	1967-01-01	0.750092	0.836925	0.725082	0.208504	GSDMD
Organelle Organization (GO:0006996)	7/418	0.754495	0.839771	0.812604	0.228916	CLUH;BIN1;VPS4A;ARL1;MICAL3;ARHGEF7;SYNE3
B Cell Differentiation (GO:0030183)	1968-01-01	0.75522	0.839771	0.714223	0.200516	PIK3R2
Cell-Cell Junction Organization (GO:0045216)	1968-01-01	0.75522	0.839771	0.714223	0.200516	SMAD3
Intermediate Filament Organization (GO:0045109)	1968-01-01	0.75522	0.839771	0.714223	0.200516	KRT7
Modification-Dependent Protein Catabolic Process (GO:0019941)	3/192	0.755335	0.839771	0.758542	0.212842	UBE3C;KEAP1;HERPUD1
Circulatory System Development (GO:0072359)	2/132	0.755423	0.839771	0.735627	0.206326	RAMP2;TGFBR2
DNA-templated DNA Replication (GO:0006261)	1969-01-01	0.760243	0.842544	0.703684	0.192892	WRNIP1
Regulation Of Endopeptidase Activity (GO:0052548)	1969-01-01	0.760243	0.842544	0.703684	0.192892	SERPINA6
Regulation Of Heart Contraction (GO:0008016)	1969-01-01	0.760243	0.842544	0.703684	0.192892	CAV3
Establishment Of Protein Localization To Membrane (GO:0090150)	1969-01-01	0.760243	0.842544	0.703684	0.192892	SYNE3
Positive Regulation Of Phosphatidylinositol 3-Kinase Signaling (GO:0014068)	1969-01-01	0.760243	0.842544	0.703684	0.192892	EXTL3
Ubiquitin-Dependent Protein Catabolic Process (GO:0006511)	6/367	0.764472	0.844896	0.793082	0.212998	UBE3C;VPS4A;ZSWIM8;KEAP1;AMBRA1;HERPUD1
Negative Regulation Of Epithelial Cell Proliferation (GO:0050680)	1970-01-01	0.765163	0.844896	0.69345	0.185614	DAB2IP
Neutrophil Chemotaxis (GO:0030593)	1970-01-01	0.765163	0.844896	0.69345	0.185614	PDE4B
Protein K48-linked Ubiquitination (GO:0070936)	1970-01-01	0.765163	0.844896	0.69345	0.185614	UBE3C
Regulation Of Notch Signaling Pathway (GO:0008593)	1970-01-01	0.765163	0.844896	0.69345	0.185614	NEURL1
Regulation Of Actin Filament-Based Process (GO:0032970)	1970-01-01	0.765163	0.844896	0.69345	0.185614	BAIAP2
Cellular Response To Metal Ion (GO:0071248)	2/135	0.766354	0.845068	0.718923	0.191313	DAXX;TFR2
Non-Membrane-Bounded Organelle Assembly (GO:0140694)	2/135	0.766354	0.845068	0.718923	0.191313	TUBGCP3;SFI1
Positive Regulation Of Gene Expression (GO:0010628)	8/480	0.768751	0.845068	0.808107	0.212523	RAMP2;SMAD3;TFR2;PHF1;AGO2;MBIP;HSPA1B;HSPA1A
Regulation Of Cilium Assembly (GO:1902017)	1971-01-01	0.769982	0.845068	0.683508	0.178661	TBC1D9B
Regulation Of Double-Strand Break Repair Via Homologous Recombination (GO:0010569)	1971-01-01	0.769982	0.845068	0.683508	0.178661	WRAP53
Regulation Of Hydrolase Activity (GO:0051336)	1971-01-01	0.769982	0.845068	0.683508	0.178661	DAB2IP
Cell-Cell Junction Assembly (GO:0007043)	1971-01-01	0.769982	0.845068	0.683508	0.178661	RAMP2
Kidney Development (GO:0001822)	1971-01-01	0.769982	0.845068	0.683508	0.178661	PAX2
Myeloid Leukocyte Differentiation (GO:0002573)	1971-01-01	0.769982	0.845068	0.683508	0.178661	TGFBR2
Negative Regulation Of Supramolecular Fiber Organization (GO:1902904)	1971-01-01	0.769982	0.845068	0.683508	0.178661	CAV3
Protein Localization To Organelle (GO:0033365)	2/137	0.773404	0.847682	0.708199	0.181974	ARL1;CNTLN
Response To Ionizing Radiation (GO:0010212)	1972-01-01	0.774703	0.847682	0.673847	0.172017	TNKS1BP1
Second-Messenger-Mediated Signaling (GO:0019932)	1972-01-01	0.774703	0.847682	0.673847	0.172017	SPHK1
Negative Regulation Of Catabolic Process (GO:0009895)	1972-01-01	0.774703	0.847682	0.673847	0.172017	DAB2IP
Protein Targeting To Membrane (GO:0006612)	1972-01-01	0.774703	0.847682	0.673847	0.172017	PEX5
Phosphorylation (GO:0016310)	7/429	0.7775	0.850229	0.790968	0.199064	MAP4K1;BRD2;TKFC;LCK;SPHK1;PTK2B;TGFBR2
DNA Replication (GO:0006260)	1973-01-01	0.779326	0.850686	0.664454	0.165665	WRNIP1
Granulocyte Chemotaxis (GO:0071621)	1973-01-01	0.779326	0.850686	0.664454	0.165665	PDE4B
Positive Regulation Of Secretion By Cell (GO:1903532)	1973-01-01	0.779326	0.850686	0.664454	0.165665	CADPS
Cellular Component Assembly (GO:0022607)	4/260	0.781478	0.852521	0.745949	0.183928	RSPH1;PTK2B;BAIAP2;CCDC40
Gland Development (GO:0048732)	1974-01-01	0.783856	0.853574	0.655318	0.15959	PHF1
Positive Regulation Of Lymphocyte Proliferation (GO:0050671)	1974-01-01	0.783856	0.853574	0.655318	0.15959	CD276
Regulation Of Cell Cycle G1/S Phase Transition (GO:1902806)	1974-01-01	0.783856	0.853574	0.655318	0.15959	AMBRA1
Nervous System Development (GO:0007399)	7/433	0.785461	0.854808	0.783378	0.189174	DHX30;ANKLE2;SZT2;NEURL1;TYRO3;ZNF76;CHERP
Positive Regulation Of Cytokine Production (GO:0001819)	5/320	0.786334	0.855244	0.757347	0.182046	SPHK1;PDE4B;HSPA1B;HSPA1A;CD276
Regulation Of Plasma Membrane Bounded Cell Projection Assembly (GO:0120032)	1975-01-01	0.788292	0.856346	0.64643	0.153777	TBC1D9B
Defense Response To Gram-negative Bacterium (GO:0050829)	1975-01-01	0.788292	0.856346	0.64643	0.153777	GSDMD
Organelle Assembly (GO:0070925)	5/322	0.790808	0.858564	0.752491	0.17661	DNAH5;VPS4A;CFAP47;AMBRA1;AP1M1
Regulation Of Cell Population Proliferation (GO:0042127)	13/766	0.791601	0.85891	0.821274	0.19193	SMAD3;SHC1;FSHB;IL34;DAB2IP;IGF2;CHERP;TGFBR2;NACC1;NEURL1;PTK2B;HSPA1B;HSPA1A
Positive Regulation Of Signal Transduction (GO:0009967)	4/266	0.796191	0.861559	0.72864	0.166069	MACF1;IGF2;DAB2IP;PTK2B
Regulation Of Cell Adhesion (GO:0030155)	2/144	0.796635	0.861559	0.673046	0.153022	PTK2B;TGM2
Monoatomic Cation Homeostasis (GO:0055080)	1977-01-01	0.796895	0.861559	0.629354	0.142884	TFR2
Neutrophil Migration (GO:1990266)	1977-01-01	0.796895	0.861559	0.629354	0.142884	PDE4B
Positive Regulation Of Endothelial Cell Proliferation (GO:0001938)	1977-01-01	0.796895	0.861559	0.629354	0.142884	IGF2
Regulation Of T Cell Proliferation (GO:0042129)	1977-01-01	0.796895	0.861559	0.629354	0.142884	CD276
Negative Regulation Of Signal Transduction (GO:0009968)	4/267	0.798564	0.862849	0.725832	0.163269	NEURL1;TYRO3;DAB2IP;FSTL3
Chromatin Organization (GO:0006325)	4/268	0.800915	0.863491	0.723045	0.160517	BRD2;DAXX;PHF1;BAZ1B
Organonitrogen Compound Catabolic Process (GO:1901565)	1978-01-01	0.801064	0.863491	0.621148	0.13778	DAB2IP
Proteolysis Involved In Protein Catabolic Process (GO:0051603)	1978-01-01	0.801064	0.863491	0.621148	0.13778	VPS4A
Regulation Of TOR Signaling (GO:0032006)	1978-01-01	0.801064	0.863491	0.621148	0.13778	NPRL2
Cellular Response To UV (GO:0034644)	1979-01-01	0.805148	0.866862	0.613154	0.132888	MC1R
Positive Regulation Of Protein Modification By Small Protein Conjugation Or Removal (GO:1903322)	1979-01-01	0.805148	0.866862	0.613154	0.132888	SPHK1
Negative Regulation Of Protein Metabolic Process (GO:0051248)	2/147	0.805931	0.867189	0.659019	0.142188	DAB2IP;FLOT2
mRNA Splicing, Via Spliceosome (GO:0000398)	3/211	0.808995	0.869619	0.688578	0.145952	PHF5A;HNRNPH3;PRPF8
Regulation Of Cytokinesis (GO:0032465)	1980-01-01	0.809149	0.869619	0.605361	0.128199	VPS4A
Axon Guidance (GO:0007411)	2/149	0.811916	0.872076	0.649986	0.13543	NOTCH3;TRIO
Cellular Response To Interleukin-1 (GO:0071347)	1981-01-01	0.813067	0.872278	0.597763	0.123702	DAB2IP
Positive Regulation Of Growth (GO:0045927)	1981-01-01	0.813067	0.872278	0.597763	0.123702	SPHK1
Plasma Membrane Bounded Cell Projection Assembly (GO:0120031)	4/275	0.816756	0.874325	0.704114	0.142523	DNAH5;CFAP47;ARHGEF7;MYLK
Regulation Of Phosphorylation (GO:0042325)	1982-01-01	0.816906	0.874325	0.590353	0.119388	ANKLE2
Cellular Response To Organic Substance (GO:0071310)	1982-01-01	0.816906	0.874325	0.590353	0.119388	RAMP2
Sodium Ion Transmembrane Transport (GO:0035725)	1982-01-01	0.816906	0.874325	0.590353	0.119388	SLC6A9
Regulation Of Nucleic Acid-Templated Transcription (GO:1903506)	7/452	0.820387	0.876279	0.749187	0.148323	NSD3;DAXX;SMAD3;PHF1;BHLHE40;MBIP;IGF2
Phospholipase C-activating G Protein-Coupled Receptor Signaling Pathway (GO:0007200)	1983-01-01	0.820665	0.876279	0.583124	0.115249	TGM2
Regulation Of NIK/NF-kappaB Signaling (GO:1901222)	1983-01-01	0.820665	0.876279	0.583124	0.115249	SPHK1
Regulation Of Cell Division (GO:0051302)	1983-01-01	0.820665	0.876279	0.583124	0.115249	MBIP
Regulation Of Cysteine-Type Endopeptidase Activity Involved In Apoptotic Process (GO:0043281)	1984-01-01	0.824348	0.876829	0.576069	0.111275	PAX2
Regulation Of Interleukin-1 Beta Production (GO:0032651)	1984-01-01	0.824348	0.876829	0.576069	0.111275	GSDMD
Positive Regulation Of Double-Strand Break Repair (GO:2000781)	1984-01-01	0.824348	0.876829	0.576069	0.111275	WRAP53
Positive Regulation Of Protein Ubiquitination (GO:0031398)	1984-01-01	0.824348	0.876829	0.576069	0.111275	SPHK1
Epithelium Development (GO:0060429)	2/154	0.826166	0.876829	0.628443	0.120007	HNRNPH3;PAX2
Calcium-Mediated Signaling (GO:0019722)	1985-01-01	0.827955	0.876829	0.569182	0.107459	SPHK1
Response To Interleukin-1 (GO:0070555)	1985-01-01	0.827955	0.876829	0.569182	0.107459	DAB2IP
Defense Response To Gram-positive Bacterium (GO:0050830)	1985-01-01	0.827955	0.876829	0.569182	0.107459	GSDMD
Mitotic Spindle Organization (GO:0007052)	1985-01-01	0.827955	0.876829	0.569182	0.107459	SPICE1
Nuclear-Transcribed mRNA Catabolic Process (GO:0000956)	1985-01-01	0.827955	0.876829	0.569182	0.107459	TNKS1BP1
Positive Regulation Of Amide Metabolic Process (GO:0034250)	1985-01-01	0.827955	0.876829	0.569182	0.107459	AGO2
Positive Regulation Of Canonical Wnt Signaling Pathway (GO:0090263)	1985-01-01	0.827955	0.876829	0.569182	0.107459	RNF220
Positive Regulation Of Endothelial Cell Migration (GO:0010595)	1985-01-01	0.827955	0.876829	0.569182	0.107459	PTK2B
Positive Regulation Of Protein Localization (GO:1903829)	1985-01-01	0.827955	0.876829	0.569182	0.107459	RANGRF
Monoatomic Cation Transmembrane Transport (GO:0098655)	4/281	0.829499	0.877951	0.688648	0.128731	SLC6A9;ATP5PO;TRPV3;CACNA2D4
Regulation Of Mitotic Cell Cycle Phase Transition (GO:1901990)	1986-01-01	0.831488	0.879543	0.562457	0.103795	AMBRA1
Positive Regulation Of Cell Differentiation (GO:0045597)	4/283	0.83358	0.881241	0.683641	0.12444	MSR1;SMAD3;PAX2;TGFBR2
Regulation Of Insulin Secretion (GO:0050796)	1987-01-01	0.834949	0.882174	0.555888	0.100273	SLC8B1
Inorganic Cation Transmembrane Transport (GO:0098662)	4/284	0.83559	0.882336	0.681164	0.122349	SLC6A9;ATP5PO;TRPV3;CACNA2D4
Peptidyl-Serine Phosphorylation (GO:0018105)	2/158	0.836859	0.883162	0.612203	0.109033	MAP4K1;TGFBR2
Regulation Of Double-Strand Break Repair (GO:2000779)	1988-01-01	0.838339	0.883695	0.54947	0.0968894	WRAP53
Positive Regulation Of Plasma Membrane Bounded Cell Projection Assembly (GO:0120034)	1988-01-01	0.838339	0.883695	0.54947	0.0968894	NEURL1
Response To Lipopolysaccharide (GO:0032496)	2/159	0.839438	0.884338	0.608272	0.106461	PDE4B;DAB2IP
Regulation Of Vesicle-Mediated Transport (GO:0060627)	1989-01-01	0.84166	0.885649	0.543199	0.0936362	SPHK1
Positive Regulation Of DNA Repair (GO:0045739)	1989-01-01	0.84166	0.885649	0.543199	0.0936362	WRAP53
Mitochondrial Respiratory Chain Complex Assembly (GO:0033108)	1990-01-01	0.844912	0.888556	0.537068	0.0905079	NDUFAF3
Regulation Of Macromolecule Metabolic Process (GO:0060255)	2/162	0.846955	0.890013	0.596775	0.0991287	ZNF683;DAXX
rRNA Metabolic Process (GO:0016072)	1991-01-01	0.848098	0.890013	0.531073	0.087499	WDR55
Regulation Of RNA Metabolic Process (GO:0051252)	1991-01-01	0.848098	0.890013	0.531073	0.087499	HNRNPH3
Chromatin Remodeling (GO:0006338)	3/228	0.848263	0.890013	0.635993	0.104662	DAXX;PHF1;BAZ1B
B Cell Activation (GO:0042113)	1992-01-01	0.851219	0.892081	0.52521	0.084604	PIK3R2
Positive Regulation Of Protein Catabolic Process (GO:0045732)	1992-01-01	0.851219	0.892081	0.52521	0.084604	DAB2IP
Peptidyl-Serine Modification (GO:0018209)	2/166	0.856481	0.896866	0.5821	0.0901807	MAP4K1;TGFBR2
Muscle Contraction (GO:0006936)	1994-01-01	0.857269	0.896866	0.513863	0.0791364	MYLK
Peptidyl-Lysine Modification (GO:0018205)	1994-01-01	0.857269	0.896866	0.513863	0.0791364	VCPKMT
Positive Regulation Of Epithelial Cell Migration (GO:0010634)	1995-01-01	0.860202	0.899415	0.50837	0.0765545	PTK2B
Regulation Of Cell Cycle (GO:0051726)	4/298	0.86166	0.900012	0.648257	0.0965223	BIN1;DAB2IP;MBIP;ANAPC1
Negative Regulation Of Cellular Process (GO:0048523)	8/537	0.861766	0.900012	0.718883	0.106949	SMAD3;VPS4A;NEURL1;DAB2IP;PTK2B;HSPA1B;HSPA1A;CHERP
Heart Development (GO:0007507)	2/171	0.867627	0.905611	0.564733	0.0801884	RAMP2;TGFBR2
Positive Regulation Of Protein-Containing Complex Assembly (GO:0031334)	1998-01-01	0.868644	0.905766	0.492571	0.0693649	DAB2IP
Positive Regulation Of Macromolecule Metabolic Process (GO:0010604)	5/364	0.868775	0.905766	0.663008	0.0932658	RAMP2;SMAD3;MBIP;HSPA1B;HSPA1A
Response To UV (GO:0009411)	1/100	0.873987	0.910152	0.482571	0.0649971	MC1R
ncRNA Processing (GO:0034470)	1/100	0.873987	0.910152	0.482571	0.0649971	WDR55
rRNA Processing (GO:0006364)	1/101	0.876577	0.912325	0.477721	0.0629303	WDR55
Regulation Of Protein Secretion (GO:0050708)	1/102	0.879114	0.913915	0.472966	0.0609373	SLC8B1
Sensory Perception Of Light Stimulus (GO:0050953)	1/102	0.879114	0.913915	0.472966	0.0609373	PAX2
Inorganic Cation Import Across Plasma Membrane (GO:0098659)	1/103	0.881599	0.915761	0.468305	0.059015	TRPV3
Negative Regulation Of Cytokine Production (GO:0001818)	2/178	0.8819	0.915761	0.542076	0.0681263	BTN2A2;EXTL3
Positive Regulation Of ERK1 And ERK2 Cascade (GO:0070374)	2/179	0.883819	0.916924	0.538986	0.0665663	SHC1;PTK2B
Positive Regulation Of Inflammatory Response (GO:0050729)	1/104	0.884033	0.916924	0.463735	0.0571606	GSDMD
Cellular Response To Organonitrogen Compound (GO:0071417)	1/105	0.886417	0.918871	0.459252	0.0553713	NEURL1
Regulation Of G1/S Transition Of Mitotic Cell Cycle (GO:2000045)	1/106	0.888752	0.920443	0.454855	0.0536445	AMBRA1
Protein Phosphorylation (GO:0006468)	7/500	0.888948	0.920443	0.674548	0.0794051	MAP4K1;BRD2;LCK;TYRO3;DAB2IP;PTK2B;TGFBR2
Negative Regulation Of Translation (GO:0017148)	1/107	0.891039	0.921206	0.450541	0.0519778	AGO2
Positive Regulation Of Autophagy (GO:0010508)	1/107	0.891039	0.921206	0.450541	0.0519778	NPRL2
RNA Processing (GO:0006396)	2/183	0.891211	0.921206	0.526966	0.060693	HNRNPH3;PRPF8
Positive Regulation Of DNA Metabolic Process (GO:0051054)	1/108	0.893279	0.922817	0.446307	0.0503687	WRAP53
Negative Regulation Of Developmental Process (GO:0051093)	1/109	0.895473	0.92403	0.442152	0.048815	ELAPOR2
Regulation Of Wnt Signaling Pathway (GO:0030111)	1/109	0.895473	0.92403	0.442152	0.048815	MACF1
Cytokine-Mediated Signaling Pathway (GO:0019221)	3/257	0.899194	0.927342	0.562536	0.0597732	IL34;PTK2B;CARD14
Mitotic Cell Cycle Phase Transition (GO:0044772)	1/111	0.899727	0.927364	0.434069	0.0458651	ANAPC1
Small GTPase Mediated Signal Transduction (GO:0007264)	1/112	0.901789	0.928433	0.430136	0.044465	RGL4
Protein Deubiquitination (GO:0016579)	1/112	0.901789	0.928433	0.430136	0.044465	USP32
Regulation Of Cytoskeleton Organization (GO:0051493)	1/114	0.905787	0.930408	0.42248	0.0418046	BAIAP2
Negative Regulation Of Canonical Wnt Signaling Pathway (GO:0090090)	1/114	0.905787	0.930408	0.42248	0.0418046	DAB2IP
Protein Modification By Small Protein Removal (GO:0070646)	1/114	0.905787	0.930408	0.42248	0.0418046	USP32
Transcription By RNA Polymerase II (GO:0006366)	2/192	0.906275	0.930408	0.501772	0.0493807	TAF1A;POLR2F
Neuron Projection Development (GO:0031175)	2/192	0.906275	0.930408	0.501772	0.0493807	TRIO;DAB2IP
Regulation Of DNA-templated Transcription (GO:0006355)	32/1922	0.910207	0.933915	0.794959	0.0747926	SHC1;PHF1;TCF20;ZBTB22;ETS2;FSTL3;NSD3;SALL4;ZSCAN32;NACC1;MBIP;ZNF746;HOXC4;ZNF568;ZNF683;BRD2;ZNF660;SREBF1;DAXX;SMAD3;ZFHX2;PAX4;DAB2IP;IGF2;ZNF76;TBR1;BAZ1B;OVOL1;ZFX;PAX2;PHF5A;BHLHE40
Regulation Of Programmed Cell Death (GO:0043067)	2/195	0.910848	0.934044	0.493896	0.0461199	PAX2;TGM2
DNA-templated Transcription (GO:0006351)	2/199	0.91662	0.938901	0.483768	0.0421178	TAF1A;POLR2F
Anterograde Trans-Synaptic Signaling (GO:0098916)	2/199	0.91662	0.938901	0.483768	0.0421178	GABRR2;RAPSN
Protein Modification Process (GO:0036211)	10/711	0.919802	0.940992	0.675369	0.0564589	MAP4K1;BRD2;PTPRA;LCK;MACROD1;PPM1H;PTK2B;BAZ1B;TGM2;TGFBR2
Chemical Synaptic Transmission (GO:0007268)	3/273	0.920179	0.940992	0.528763	0.0439861	GABRR2;SLC6A9;RAPSN
Regulation Of Protein Catabolic Process (GO:0042176)	1/122	0.92022	0.940992	0.394385	0.0327902	DAB2IP
Positive Regulation Of Epithelial Cell Proliferation (GO:0050679)	1/123	0.921861	0.942139	0.391132	0.0318227	PAX2
Defense Response To Bacterium (GO:0042742)	2/204	0.923343	0.942188	0.471671	0.0376177	GSDMD;SHC1
Positive Regulation Of Defense Response (GO:0031349)	1/124	0.923469	0.942188	0.387932	0.0308864	GSDMD
Regulation Of DNA Metabolic Process (GO:0051052)	1/124	0.923469	0.942188	0.387932	0.0308864	MPV17
Response To Cytokine (GO:0034097)	1/125	0.925044	0.943264	0.384784	0.0299801	SPHK1
Protein-Containing Complex Organization (GO:0043933)	1/126	0.926586	0.944012	0.381686	0.0291028	PTK2B
Regulation Of Canonical Wnt Signaling Pathway (GO:0060828)	2/207	0.927129	0.944012	0.464697	0.0351601	DAB2IP;RNF220
Regulation Of Gene Expression (GO:0010468)	17/1127	0.927341	0.944012	0.722047	0.0544671	ZNF683;BTNL9;MSR1;DAXX;RAMP2;SMAD3;BTN2A2;PHF1;IGF2;NSD3;BHLHE40;MBIP;FLOT2;HNRNPH3;HSPA1B;HSPA1A;CD276
Regulation Of Tumor Necrosis Factor Production (GO:0032680)	1/127	0.928097	0.944252	0.378638	0.0282535	MC1R
Regulation Of DNA Repair (GO:0006282)	1/129	0.931026	0.9467	0.372683	0.0266348	WRAP53
Negative Regulation Of DNA-templated Transcription (GO:0045892)	15/1025	0.934423	0.949621	0.700395	0.0475052	DAXX;SMAD3;SHC1;DAB2IP;IGF2;TBR1;PAX2;ETS2;BIN1;NACC1;BHLHE40;ZNF746;ZNF568;TRIM37;HSPA1A
Proteasomal Protein Catabolic Process (GO:0010498)	2/220	0.941586	0.955842	0.436693	0.0262845	ZSWIM8;AMBRA1
Negative Regulation Of Cellular Biosynthetic Process (GO:0031327)	1/137	0.9416	0.955842	0.350616	0.0210984	PGPEP1
Gene Expression (GO:0010467)	3/296	0.943416	0.95715	0.486676	0.0283477	AGO2;HNRNPH3;TGM2
Negative Regulation Of Wnt Signaling Pathway (GO:0030178)	1/140	0.945134	0.958356	0.342996	0.0193549	DAB2IP
Protein Polyubiquitination (GO:0000209)	2/226	0.947299	0.960014	0.424864	0.0230023	UBE3C;ANAPC1
Cilium Organization (GO:0044782)	2/228	0.949082	0.961186	0.421061	0.0220045	DNAH5;CFAP47
Ras Protein Signal Transduction (GO:0007265)	1/144	0.949516	0.961186	0.333333	0.0172677	RGL4
Regulation Of Cold-Induced Thermogenesis (GO:0120161)	1/146	0.951574	0.962571	0.328702	0.016316	SLC25A44
Negative Regulation Of Transcription By RNA Polymerase II (GO:0000122)	10/763	0.95231	0.962571	0.626999	0.0306379	SMAD3;BIN1;BHLHE40;DAB2IP;ZNF746;IGF2;ZNF568;TRIM37;ETS2;HSPA1A
Regulation Of I-kappaB kinase/NF-kappaB Signaling (GO:0043122)	2/232	0.952478	0.962571	0.413652	0.0201399	DAB2IP;MIB2
Neuron Development (GO:0048666)	1/150	0.955443	0.964171	0.319812	0.0145771	TENM4
protein-RNA Complex Assembly (GO:0022618)	1/150	0.955443	0.964171	0.319812	0.0145771	AGO2
Inflammatory Response (GO:0006954)	2/236	0.955657	0.964171	0.406497	0.0184371	LTB4R2;CCR3
Positive Regulation Of Multicellular Organismal Process (GO:0051240)	4/387	0.958014	0.96601	0.495323	0.021246	SMAD3;AGO2;PAX2;TGFBR2
Ribosome Biogenesis (GO:0042254)	1/155	0.959848	0.966784	0.309349	0.0126772	WDR55
Positive Regulation Of Response To External Stimulus (GO:0032103)	1/155	0.959848	0.966784	0.309349	0.0126772	GSDMD
Peptide Biosynthetic Process (GO:0043043)	1/158	0.96228	0.968695	0.303391	0.0116653	AGO2
Double-Strand Break Repair (GO:0006302)	1/168	0.969373	0.975294	0.285077	0.0088675	TNKS1BP1
Neuron Differentiation (GO:0030182)	1/173	0.972404	0.9778	0.276719	0.00774374	TENM4
Positive Regulation Of I-kappaB kinase/NF-kappaB Signaling (GO:0043123)	1/175	0.97353	0.97839	0.27351	0.00733721	MIB2
Macromolecule Biosynthetic Process (GO:0009059)	1/183	0.977597	0.981932	0.26138	0.00592237	AGO2
Defense Response To Virus (GO:0051607)	1/189	0.980232	0.984033	0.252959	0.00505067	TRIM7
Regulation Of Signal Transduction (GO:0009966)	1/193	0.981814	0.985076	0.247638	0.00454495	CAV3
DNA Damage Response (GO:0006974)	3/384	0.985931	0.988659	0.372561	0.00527866	PHF1;MACROD1;BAZ1B
Positive Regulation Of Nucleic Acid-Templated Transcription (GO:1903508)	5/557	0.989782	0.991971	0.426868	0.00438432	NSD3;PHF5A;SMAD3;SHC1;PAX2
Proteolysis (GO:0006508)	2/330	0.99173	0.993371	0.288593	0.00239662	CAPN13;ADAM11
Translation (GO:0006412)	1/234	0.992275	0.993371	0.203631	0.00157918	AGO2
DNA Metabolic Process (GO:0006259)	1/288	0.997504	0.998055	0.164856	0.000411959	CBS
Cellular Response To Cytokine Stimulus (GO:0071345)	1/308	0.998358	0.998358	0.153957	0.00025294	DAB2IP
